# Supplementary material for: Lipidomic characteristics and clinical findings of epileptic patients treated with valproic acid
Source: PubMed Central journal article supplement (PMC6714506; doi:10.1111/jcmm.14464), 2019-06-04
Supplement: JCMM-23-6017-s001.pdf [file JCMM-23-6017-s001.pdf]

| ID       | ratio    | t.test_p.val | wilcox.test | t.test_p.val | wilcox.test | roc | lowROC | upROC |
|----------|----------|--------------|-------------|--------------|-------------|-----|--------|-------|
| M1005T10 | 45.947   | 0.04929      | 0.1         | 0.593499     | 0.544554    | 1   | 1      | 1     |
| M1007T24 | 0.502312 | 0.005709     | 0.1         | 0.593499     | 0.544554    | 1   | 1      | 1     |
| M1018T40 | 1.768539 | 0.012081     | 0.1         | 0.593499     | 0.544554    | 1   | 1      | 1     |
| M1030T80 | 0.537951 | 0.022197     | 0.1         | 0.593499     | 0.544554    | 1   | 1      | 1     |
| M1051T39 | 0.655341 | 0.039162     | 0.1         | 0.593499     | 0.544554    | 1   | 1      | 1     |
| M1064T11 | 5.609563 | 0.043189     | 0.1         | 0.593499     | 0.544554    | 1   | 1      | 1     |
| M1068T21 | 9.691391 | 0.019873     | 0.1         | 0.593499     | 0.544554    | 1   | 1      | 1     |
| M1086T69 | 0.222146 | 0.011246     | 0.1         | 0.593499     | 0.544554    | 1   | 1      | 1     |
| M1087T69 | 0.181507 | 0.01743      | 0.1         | 0.593499     | 0.544554    | 1   | 1      | 1     |
| M1121T11 | 27.36325 | 0.040431     | 0.1         | 0.593499     | 0.544554    | 1   | 1      | 1     |
| M1150T27 | 0.571087 | 0.024205     | 0.1         | 0.593499     | 0.544554    | 1   | 1      | 1     |
| M1159T29 | 1.902675 | 0.013293     | 0.1         | 0.593499     | 0.544554    | 1   | 1      | 1     |
| M1160T29 | 2.1316   | 0.000261     | 0.1         | 0.593499     | 0.544554    | 1   | 1      | 1     |
| M1164T27 | 1.615054 | 0.036908     | 0.1         | 0.593499     | 0.544554    | 1   | 1      | 1     |
| M1230T25 | 9.006731 | 0.03818      | 0.1         | 0.593499     | 0.544554    | 1   | 1      | 1     |
| M1426T23 | 0.189862 | 0.0148       | 0.1         | 0.593499     | 0.544554    | 1   | 1      | 1     |
| M1466T29 | 0.400832 | 0.015467     | 0.1         | 0.593499     | 0.544554    | 1   | 1      | 1     |
| M1469T29 | 0.451958 | 0.001423     | 0.1         | 0.593499     | 0.544554    | 1   | 1      | 1     |
| M1475T27 | 0.603532 | 0.023306     | 0.1         | 0.593499     | 0.544554    | 1   | 1      | 1     |
| M1475T29 | 0.218502 | 0.012839     | 0.1         | 0.593499     | 0.544554    | 1   | 1      | 1     |
| M1482T23 | 0.224149 | 0.026988     | 0.1         | 0.593499     | 0.544554    | 1   | 1      | 1     |
| M1486T26 | 2.095666 | 0.017222     | 0.1         | 0.593499     | 0.544554    | 1   | 1      | 1     |
| M1502T29 | 0.483998 | 0.006942     | 0.1         | 0.593499     | 0.544554    | 1   | 1      | 1     |
| M1505T23 | 0.110378 | 0.003094     | 0.1         | 0.593499     | 0.544554    | 1   | 1      | 1     |
| M1509T25 | 0.40174  | 0.017917     | 0.1         | 0.593499     | 0.544554    | 1   | 1      | 1     |
| M1510T25 | 0.392089 | 0.006187     | 0.1         | 0.593499     | 0.544554    | 1   | 1      | 1     |
| M1511T25 | 0.567697 | 0.015116     | 0.1         | 0.593499     | 0.544554    | 1   | 1      | 1     |
| M1513T26 | 0.616302 | 0.00877      | 0.1         | 0.593499     | 0.544554    | 1   | 1      | 1     |
| M1561T24 | 0.193929 | 0.037034     | 0.1         | 0.593499     | 0.544554    | 1   | 1      | 1     |
| M1571T32 | 0.612653 | 0.035039     | 0.1         | 0.593499     | 0.544554    | 1   | 1      | 1     |
| M1596T32 | 0.49668  | 0.003945     | 0.1         | 0.593499     | 0.544554    | 1   | 1      | 1     |
| M1600T34 | 0.558411 | 0.017186     | 0.1         | 0.593499     | 0.544554    | 1   | 1      | 1     |
| M1612T25 | 0.225487 | 0.010578     | 0.1         | 0.593499     | 0.544554    | 1   | 1      | 1     |
| M1613T25 | 0.284469 | 0.024931     | 0.1         | 0.593499     | 0.544554    | 1   | 1      | 1     |
| M1614T25 | 0.303948 | 0.042529     | 0.1         | 0.593499     | 0.544554    | 1   | 1      | 1     |
| M1621T29 | 0.46221  | 0.043625     | 0.1         | 0.593499     | 0.544554    | 1   | 1      | 1     |
| M1627T34 | 0.460472 | 0.021997     | 0.1         | 0.593499     | 0.544554    | 1   | 1      | 1     |
| M1629T28 | 0.52599  | 0.029043     | 0.1         | 0.593499     | 0.544554    | 1   | 1      | 1     |
| M1636T25 | 0.255274 | 0.026092     | 0.1         | 0.593499     | 0.544554    | 1   | 1      | 1     |
| M1650T34 | 0.555874 | 0.044335     | 0.1         | 0.593499     | 0.544554    | 1   | 1      | 1     |
| M220T473 | 1.892892 | 0.040647     | 0.1         | 0.593499     | 0.544554    | 1   | 1      | 1     |
| M282T320 | 0.441617 | 0.016709     | 0.1         | 0.593499     | 0.544554    | 1   | 1      | 1     |
| M282T348 | 0.431493 | 0.021367     | 0.1         | 0.593499     | 0.544554    | 1   | 1      | 1     |
| M310T143 | 1.576962 | 0.047448     | 0.1         | 0.593499     | 0.544554    | 1   | 1      | 1     |
| M324T200 | 0.609165 | 0.029314     | 0.1         | 0.593499     | 0.544554    | 1   | 1      | 1     |
| M326T186 | 0.457678 | 0.038704     | 0.1         | 0.593499     | 0.544554    | 1   | 1      | 1     |
| M339T357 | 2.3509   | 0.033578     | 0.1         | 0.593499     | 0.544554    | 1   | 1      | 1     |
| M341T60  | 1.757575 | 0.023206     | 0.1         | 0.593499     | 0.544554    | 1   | 1      | 1     |
| M342T230 | 0.57428  | 0.039036     | 0.1         | 0.593499     | 0.544554    | 1   | 1      | 1     |
| M343T231 | 0.605525 | 0.020207     | 0.1         | 0.593499     | 0.544554    | 1   | 1      | 1     |
| M355T55  | 4.455121 | 0.014497     | 0.1         | 0.593499     | 0.544554    | 1   | 1      | 1     |
| M361T70  | 0.461109 | 0.040523     | 0.1         | 0.593499     | 0.544554    | 1   | 1      | 1     |
| M363T304 | 3.263292 | 0.02237      | 0.1         | 0.593499     | 0.544554    | 1   | 1      | 1     |
| M363T327 | 0.620474 | 0.002266     | 0.1         | 0.593499     | 0.544554    | 1   | 1      | 1     |
| M364T124 | 0.551013 | 0.028476     | 0.1         | 0.593499     | 0.544554    | 1   | 1      | 1     |
| M365T48  | 3.589384 | 0.020366     | 0.1         | 0.593499     | 0.544554    | 1   | 1      | 1     |
| M367T69  | 2.097913 | 0.01671      | 0.1         | 0.593499     | 0.544554    | 1   | 1      | 1     |

|          |          |          |     |          |          |   |   |   |
|----------|----------|----------|-----|----------|----------|---|---|---|
| M369T452 | 0.130363 | 0.003223 | 0.1 | 0.593499 | 0.544554 | 1 | 1 | 1 |
| M370T452 | 0.158741 | 0.006933 | 0.1 | 0.593499 | 0.544554 | 1 | 1 | 1 |
| M385T67  | 0.406017 | 0.006335 | 0.1 | 0.593499 | 0.544554 | 1 | 1 | 1 |
| M386T220 | 0.596045 | 0.008297 | 0.1 | 0.593499 | 0.544554 | 1 | 1 | 1 |
| M390T69  | 0.641455 | 0.024954 | 0.1 | 0.593499 | 0.544554 | 1 | 1 | 1 |
| M399T272 | 1.764638 | 0.045117 | 0.1 | 0.593499 | 0.544554 | 1 | 1 | 1 |
| M401T99  | 0.367316 | 0.017556 | 0.1 | 0.593499 | 0.544554 | 1 | 1 | 1 |
| M402T108 | 7.385541 | 0.014519 | 0.1 | 0.593499 | 0.544554 | 1 | 1 | 1 |
| M407T89  | 0.640872 | 0.035277 | 0.1 | 0.593499 | 0.544554 | 1 | 1 | 1 |
| M411T49  | 0.622128 | 0.040069 | 0.1 | 0.593499 | 0.544554 | 1 | 1 | 1 |
| M412T279 | 2.037312 | 0.025186 | 0.1 | 0.593499 | 0.544554 | 1 | 1 | 1 |
| M412T279 | 1.93212  | 0.02611  | 0.1 | 0.593499 | 0.544554 | 1 | 1 | 1 |
| M422T46  | 81.39351 | 0.034959 | 0.1 | 0.593499 | 0.544554 | 1 | 1 | 1 |
| M424T70  | 0.503388 | 0.034522 | 0.1 | 0.593499 | 0.544554 | 1 | 1 | 1 |
| M425T70  | 0.573357 | 0.035125 | 0.1 | 0.593499 | 0.544554 | 1 | 1 | 1 |
| M425T94  | 0.367141 | 0.046492 | 0.1 | 0.593499 | 0.544554 | 1 | 1 | 1 |
| M426T309 | 4.896884 | 0.016325 | 0.1 | 0.593499 | 0.544554 | 1 | 1 | 1 |
| M428T105 | 0.627521 | 0.02287  | 0.1 | 0.593499 | 0.544554 | 1 | 1 | 1 |
| M428T46  | 5.571569 | 0.000509 | 0.1 | 0.593499 | 0.544554 | 1 | 1 | 1 |
| M429T106 | 0.600362 | 0.022989 | 0.1 | 0.593499 | 0.544554 | 1 | 1 | 1 |
| M433T131 | 1.553583 | 0.022498 | 0.1 | 0.593499 | 0.544554 | 1 | 1 | 1 |
| M439T425 | 7.88944  | 0.023371 | 0.1 | 0.593499 | 0.544554 | 1 | 1 | 1 |
| M444T128 | 2.713254 | 0.014077 | 0.1 | 0.593499 | 0.544554 | 1 | 1 | 1 |
| M444T201 | 0.639079 | 0.04434  | 0.1 | 0.593499 | 0.544554 | 1 | 1 | 1 |
| M447T121 | 0.243268 | 0.022475 | 0.1 | 0.593499 | 0.544554 | 1 | 1 | 1 |
| M456T57  | 2.190471 | 0.046412 | 0.1 | 0.593499 | 0.544554 | 1 | 1 | 1 |
| M467T136 | 0.552783 | 0.001658 | 0.1 | 0.593499 | 0.544554 | 1 | 1 | 1 |
| M476T43  | 1.561817 | 0.045638 | 0.1 | 0.593499 | 0.544554 | 1 | 1 | 1 |
| M480T143 | 0.659314 | 0.004014 | 0.1 | 0.593499 | 0.544554 | 1 | 1 | 1 |
| M480T285 | 0.488946 | 0.027238 | 0.1 | 0.593499 | 0.544554 | 1 | 1 | 1 |
| M480T78  | 2.420499 | 0.034116 | 0.1 | 0.593499 | 0.544554 | 1 | 1 | 1 |
| M483T70  | 0.324045 | 0.026891 | 0.1 | 0.593499 | 0.544554 | 1 | 1 | 1 |
| M484T70  | 0.383973 | 0.03455  | 0.1 | 0.593499 | 0.544554 | 1 | 1 | 1 |
| M488T59  | 5.356131 | 0.049145 | 0.1 | 0.593499 | 0.544554 | 1 | 1 | 1 |
| M492T112 | 0.352353 | 0.016745 | 0.1 | 0.593499 | 0.544554 | 1 | 1 | 1 |
| M494T52  | 1.861601 | 0.049915 | 0.1 | 0.593499 | 0.544554 | 1 | 1 | 1 |
| M495T454 | 6.971054 | 0.045677 | 0.1 | 0.593499 | 0.544554 | 1 | 1 | 1 |
| M500T230 | 0.587258 | 0.048234 | 0.1 | 0.593499 | 0.544554 | 1 | 1 | 1 |
| M501T223 | 0.590629 | 0.023008 | 0.1 | 0.593499 | 0.544554 | 1 | 1 | 1 |
| M502T288 | 0.552739 | 0.041339 | 0.1 | 0.593499 | 0.544554 | 1 | 1 | 1 |
| M502T70_ | 0.345123 | 0.021132 | 0.1 | 0.593499 | 0.544554 | 1 | 1 | 1 |
| M503T70_ | 0.406746 | 0.037742 | 0.1 | 0.593499 | 0.544554 | 1 | 1 | 1 |
| M512T123 | 0.603439 | 0.026167 | 0.1 | 0.593499 | 0.544554 | 1 | 1 | 1 |
| M519T444 | 3.501917 | 0.032932 | 0.1 | 0.593499 | 0.544554 | 1 | 1 | 1 |
| M519T70  | 0.403782 | 0.046527 | 0.1 | 0.593499 | 0.544554 | 1 | 1 | 1 |
| M520T70_ | 0.317585 | 0.01867  | 0.1 | 0.593499 | 0.544554 | 1 | 1 | 1 |
| M520T70_ | 0.324494 | 0.033925 | 0.1 | 0.593499 | 0.544554 | 1 | 1 | 1 |
| M521T70  | 0.345015 | 0.03481  | 0.1 | 0.593499 | 0.544554 | 1 | 1 | 1 |
| M522T296 | 1.598774 | 0.002559 | 0.1 | 0.593499 | 0.544554 | 1 | 1 | 1 |
| M522T455 | 10.79288 | 0.037613 | 0.1 | 0.593499 | 0.544554 | 1 | 1 | 1 |
| M522T69  | 0.382761 | 0.020471 | 0.1 | 0.593499 | 0.544554 | 1 | 1 | 1 |
| M523T256 | 0.606894 | 0.011307 | 0.1 | 0.593499 | 0.544554 | 1 | 1 | 1 |
| M526T67  | 0.369277 | 0.045554 | 0.1 | 0.593499 | 0.544554 | 1 | 1 | 1 |
| M526T68  | 0.506375 | 0.027887 | 0.1 | 0.593499 | 0.544554 | 1 | 1 | 1 |
| M527T282 | 0.445609 | 0.002403 | 0.1 | 0.593499 | 0.544554 | 1 | 1 | 1 |
| M531T479 | 2.799277 | 0.044495 | 0.1 | 0.593499 | 0.544554 | 1 | 1 | 1 |
| M531T66  | 0.481937 | 0.028862 | 0.1 | 0.593499 | 0.544554 | 1 | 1 | 1 |
| M531T96  | 2.302112 | 0.002699 | 0.1 | 0.593499 | 0.544554 | 1 | 1 | 1 |

|          |          |          |     |          |          |   |   |   |
|----------|----------|----------|-----|----------|----------|---|---|---|
| M535T321 | 0.531319 | 0.024972 | 0.1 | 0.593499 | 0.544554 | 1 | 1 | 1 |
| M536T186 | 0.417871 | 0.021081 | 0.1 | 0.593499 | 0.544554 | 1 | 1 | 1 |
| M539T159 | 0.399057 | 0.019685 | 0.1 | 0.593499 | 0.544554 | 1 | 1 | 1 |
| M539T51  | 2.194877 | 0.046907 | 0.1 | 0.593499 | 0.544554 | 1 | 1 | 1 |
| M540T256 | 0.464116 | 0.016414 | 0.1 | 0.593499 | 0.544554 | 1 | 1 | 1 |
| M540T78  | 1.685906 | 0.020329 | 0.1 | 0.593499 | 0.544554 | 1 | 1 | 1 |
| M542T159 | 2.126077 | 0.03557  | 0.1 | 0.593499 | 0.544554 | 1 | 1 | 1 |
| M542T259 | 1.631632 | 0.016791 | 0.1 | 0.593499 | 0.544554 | 1 | 1 | 1 |
| M542T70  | 0.315399 | 0.030069 | 0.1 | 0.593499 | 0.544554 | 1 | 1 | 1 |
| M543T70  | 0.331924 | 0.027686 | 0.1 | 0.593499 | 0.544554 | 1 | 1 | 1 |
| M544T68  | 0.434026 | 0.026424 | 0.1 | 0.593499 | 0.544554 | 1 | 1 | 1 |
| M545T68  | 0.48844  | 0.02393  | 0.1 | 0.593499 | 0.544554 | 1 | 1 | 1 |
| M548T68  | 0.49229  | 0.018358 | 0.1 | 0.593499 | 0.544554 | 1 | 1 | 1 |
| M549T331 | 2.341016 | 0.042827 | 0.1 | 0.593499 | 0.544554 | 1 | 1 | 1 |
| M550T66  | 0.409211 | 0.001418 | 0.1 | 0.593499 | 0.544554 | 1 | 1 | 1 |
| M550T88  | 1.732986 | 0.004584 | 0.1 | 0.593499 | 0.544554 | 1 | 1 | 1 |
| M551T258 | 0.496398 | 0.018466 | 0.1 | 0.593499 | 0.544554 | 1 | 1 | 1 |
| M559T70  | 0.511674 | 0.024954 | 0.1 | 0.593499 | 0.544554 | 1 | 1 | 1 |
| M560T122 | 0.656058 | 0.036528 | 0.1 | 0.593499 | 0.544554 | 1 | 1 | 1 |
| M561T246 | 0.328693 | 0.035617 | 0.1 | 0.593499 | 0.544554 | 1 | 1 | 1 |
| M562T132 | 0.361684 | 0.035442 | 0.1 | 0.593499 | 0.544554 | 1 | 1 | 1 |
| M564T344 | 2.17781  | 0.039889 | 0.1 | 0.593499 | 0.544554 | 1 | 1 | 1 |
| M564T499 | 1.743802 | 0.014891 | 0.1 | 0.593499 | 0.544554 | 1 | 1 | 1 |
| M565T469 | 6.01537  | 0.042953 | 0.1 | 0.593499 | 0.544554 | 1 | 1 | 1 |
| M565T470 | 0.533031 | 0.03434  | 0.1 | 0.593499 | 0.544554 | 1 | 1 | 1 |
| M566T68  | 0.374937 | 0.007983 | 0.1 | 0.593499 | 0.544554 | 1 | 1 | 1 |
| M567T68  | 0.369833 | 0.003341 | 0.1 | 0.593499 | 0.544554 | 1 | 1 | 1 |
| M568T258 | 0.390402 | 0.043437 | 0.1 | 0.593499 | 0.544554 | 1 | 1 | 1 |
| M568T66  | 0.317588 | 0.047922 | 0.1 | 0.593499 | 0.544554 | 1 | 1 | 1 |
| M569T66  | 0.346148 | 0.019916 | 0.1 | 0.593499 | 0.544554 | 1 | 1 | 1 |
| M570T108 | 1.71753  | 0.006965 | 0.1 | 0.593499 | 0.544554 | 1 | 1 | 1 |
| M570T71  | 0.532305 | 0.019999 | 0.1 | 0.593499 | 0.544554 | 1 | 1 | 1 |
| M571T71  | 0.632199 | 0.038236 | 0.1 | 0.593499 | 0.544554 | 1 | 1 | 1 |
| M578T302 | 2.241179 | 0.046448 | 0.1 | 0.593499 | 0.544554 | 1 | 1 | 1 |
| M584T387 | 1.86294  | 0.010196 | 0.1 | 0.593499 | 0.544554 | 1 | 1 | 1 |
| M589T109 | 1.836628 | 0.044468 | 0.1 | 0.593499 | 0.544554 | 1 | 1 | 1 |
| M589T353 | 0.645871 | 0.003896 | 0.1 | 0.593499 | 0.544554 | 1 | 1 | 1 |
| M590T169 | 0.521511 | 0.019258 | 0.1 | 0.593499 | 0.544554 | 1 | 1 | 1 |
| M590T332 | 1.701256 | 0.009693 | 0.1 | 0.593499 | 0.544554 | 1 | 1 | 1 |
| M592T71  | 0.467533 | 0.032894 | 0.1 | 0.593499 | 0.544554 | 1 | 1 | 1 |
| M595T441 | 1.622863 | 0.036805 | 0.1 | 0.593499 | 0.544554 | 1 | 1 | 1 |
| M596T371 | 0.309158 | 0.024558 | 0.1 | 0.593499 | 0.544554 | 1 | 1 | 1 |
| M597T87  | 0.567346 | 0.011269 | 0.1 | 0.593499 | 0.544554 | 1 | 1 | 1 |
| M604T358 | 2.193003 | 0.049896 | 0.1 | 0.593499 | 0.544554 | 1 | 1 | 1 |
| M605T381 | 1.538049 | 0.035555 | 0.1 | 0.593499 | 0.544554 | 1 | 1 | 1 |
| M610T133 | 0.185561 | 0.006089 | 0.1 | 0.593499 | 0.544554 | 1 | 1 | 1 |
| M615T88  | 2.921661 | 0.006104 | 0.1 | 0.593499 | 0.544554 | 1 | 1 | 1 |
| M616T401 | 1.857899 | 0.045759 | 0.1 | 0.593499 | 0.544554 | 1 | 1 | 1 |
| M619T363 | 0.429112 | 0.000399 | 0.1 | 0.593499 | 0.544554 | 1 | 1 | 1 |
| M624T70  | 0.279233 | 0.046969 | 0.1 | 0.593499 | 0.544554 | 1 | 1 | 1 |
| M628T160 | 0.600064 | 0.037394 | 0.1 | 0.593499 | 0.544554 | 1 | 1 | 1 |
| M629T317 | 0.394785 | 0.001399 | 0.1 | 0.593499 | 0.544554 | 1 | 1 | 1 |
| M631T337 | 0.489858 | 0.006985 | 0.1 | 0.593499 | 0.544554 | 1 | 1 | 1 |
| M632T189 | 0.470659 | 0.040618 | 0.1 | 0.593499 | 0.544554 | 1 | 1 | 1 |
| M632T481 | 5.709785 | 0.045114 | 0.1 | 0.593499 | 0.544554 | 1 | 1 | 1 |
| M632T53  | 3.171898 | 0.01616  | 0.1 | 0.593499 | 0.544554 | 1 | 1 | 1 |
| M638T314 | 0.435833 | 0.034992 | 0.1 | 0.593499 | 0.544554 | 1 | 1 | 1 |
| M642T105 | 0.650855 | 0.034273 | 0.1 | 0.593499 | 0.544554 | 1 | 1 | 1 |

|          |          |          |     |          |          |   |   |   |
|----------|----------|----------|-----|----------|----------|---|---|---|
| M644T160 | 0.578705 | 0.049398 | 0.1 | 0.593499 | 0.544554 | 1 | 1 | 1 |
| M645T502 | 1.525407 | 0.027996 | 0.1 | 0.593499 | 0.544554 | 1 | 1 | 1 |
| M648T519 | 3.254043 | 0.001236 | 0.1 | 0.593499 | 0.544554 | 1 | 1 | 1 |
| M650T496 | 1.593602 | 0.028914 | 0.1 | 0.593499 | 0.544554 | 1 | 1 | 1 |
| M652T310 | 1.885038 | 0.033837 | 0.1 | 0.593499 | 0.544554 | 1 | 1 | 1 |
| M652T435 | 1.72381  | 0.031769 | 0.1 | 0.593499 | 0.544554 | 1 | 1 | 1 |
| M655T156 | 1.726943 | 0.026219 | 0.1 | 0.593499 | 0.544554 | 1 | 1 | 1 |
| M656T475 | 3.123356 | 0.033325 | 0.1 | 0.593499 | 0.544554 | 1 | 1 | 1 |
| M667T341 | 0.410916 | 0.015812 | 0.1 | 0.593499 | 0.544554 | 1 | 1 | 1 |
| M670T364 | 1.659862 | 0.015614 | 0.1 | 0.593499 | 0.544554 | 1 | 1 | 1 |
| M670T393 | 2.85074  | 0.022031 | 0.1 | 0.593499 | 0.544554 | 1 | 1 | 1 |
| M674T288 | 0.51923  | 0.033643 | 0.1 | 0.593499 | 0.544554 | 1 | 1 | 1 |
| M682T382 | 1.941336 | 0.033964 | 0.1 | 0.593499 | 0.544554 | 1 | 1 | 1 |
| M682T389 | 0.583614 | 0.007002 | 0.1 | 0.593499 | 0.544554 | 1 | 1 | 1 |
| M684T230 | 0.540591 | 0.038977 | 0.1 | 0.593499 | 0.544554 | 1 | 1 | 1 |
| M687T235 | 0.48545  | 0.033393 | 0.1 | 0.593499 | 0.544554 | 1 | 1 | 1 |
| M687T488 | 2.420876 | 0.045528 | 0.1 | 0.593499 | 0.544554 | 1 | 1 | 1 |
| M693T282 | 0.464469 | 0.015231 | 0.1 | 0.593499 | 0.544554 | 1 | 1 | 1 |
| M698T474 | 1.770149 | 0.01792  | 0.1 | 0.593499 | 0.544554 | 1 | 1 | 1 |
| M699T475 | 2.058142 | 0.016834 | 0.1 | 0.593499 | 0.544554 | 1 | 1 | 1 |
| M705T287 | 0.624975 | 0.004773 | 0.1 | 0.593499 | 0.544554 | 1 | 1 | 1 |
| M706T287 | 0.505065 | 0.012595 | 0.1 | 0.593499 | 0.544554 | 1 | 1 | 1 |
| M709T259 | 0.569368 | 0.034947 | 0.1 | 0.593499 | 0.544554 | 1 | 1 | 1 |
| M711T275 | 44.74693 | 0.027906 | 0.1 | 0.593499 | 0.544554 | 1 | 1 | 1 |
| M711T303 | 0.399085 | 0.027816 | 0.1 | 0.593499 | 0.544554 | 1 | 1 | 1 |
| M711T314 | 0.615439 | 0.008033 | 0.1 | 0.593499 | 0.544554 | 1 | 1 | 1 |
| M712T264 | 0.535475 | 0.026046 | 0.1 | 0.593499 | 0.544554 | 1 | 1 | 1 |
| M716T248 | 0.650356 | 0.00294  | 0.1 | 0.593499 | 0.544554 | 1 | 1 | 1 |
| M717T201 | 5.05075  | 0.018926 | 0.1 | 0.593499 | 0.544554 | 1 | 1 | 1 |
| M717T247 | 0.414555 | 0.044386 | 0.1 | 0.593499 | 0.544554 | 1 | 1 | 1 |
| M718T283 | 0.48208  | 0.014015 | 0.1 | 0.593499 | 0.544554 | 1 | 1 | 1 |
| M719T287 | 0.521149 | 0.021278 | 0.1 | 0.593499 | 0.544554 | 1 | 1 | 1 |
| M719T303 | 2.387353 | 0.021429 | 0.1 | 0.593499 | 0.544554 | 1 | 1 | 1 |
| M719T307 | 0.353107 | 0.001094 | 0.1 | 0.593499 | 0.544554 | 1 | 1 | 1 |
| M720T277 | 43.62795 | 0.021346 | 0.1 | 0.593499 | 0.544554 | 1 | 1 | 1 |
| M720T287 | 0.513622 | 0.003225 | 0.1 | 0.593499 | 0.544554 | 1 | 1 | 1 |
| M720T303 | 2.101726 | 0.018141 | 0.1 | 0.593499 | 0.544554 | 1 | 1 | 1 |
| M720T307 | 0.387838 | 0.003546 | 0.1 | 0.593499 | 0.544554 | 1 | 1 | 1 |
| M721T230 | 0.498303 | 0.035808 | 0.1 | 0.593499 | 0.544554 | 1 | 1 | 1 |
| M721T230 | 0.406498 | 0.032163 | 0.1 | 0.593499 | 0.544554 | 1 | 1 | 1 |
| M721T312 | 0.465547 | 0.005416 | 0.1 | 0.593499 | 0.544554 | 1 | 1 | 1 |
| M722T312 | 0.484347 | 0.002979 | 0.1 | 0.593499 | 0.544554 | 1 | 1 | 1 |
| M723T312 | 0.470903 | 0.01573  | 0.1 | 0.593499 | 0.544554 | 1 | 1 | 1 |
| M726T401 | 2.389016 | 0.049778 | 0.1 | 0.593499 | 0.544554 | 1 | 1 | 1 |
| M728T238 | 0.351624 | 0.006362 | 0.1 | 0.593499 | 0.544554 | 1 | 1 | 1 |
| M729T238 | 0.400817 | 0.0444   | 0.1 | 0.593499 | 0.544554 | 1 | 1 | 1 |
| M729T291 | 0.507942 | 0.043286 | 0.1 | 0.593499 | 0.544554 | 1 | 1 | 1 |
| M730T264 | 0.441636 | 0.036957 | 0.1 | 0.593499 | 0.544554 | 1 | 1 | 1 |
| M730T282 | 0.511787 | 0.008017 | 0.1 | 0.593499 | 0.544554 | 1 | 1 | 1 |
| M731T264 | 0.46476  | 0.028849 | 0.1 | 0.593499 | 0.544554 | 1 | 1 | 1 |
| M732T264 | 0.473823 | 0.028668 | 0.1 | 0.593499 | 0.544554 | 1 | 1 | 1 |
| M733T291 | 0.520711 | 0.045756 | 0.1 | 0.593499 | 0.544554 | 1 | 1 | 1 |
| M734T57  | 6.971431 | 0.001479 | 0.1 | 0.593499 | 0.544554 | 1 | 1 | 1 |
| M737T411 | 5.861296 | 0.00204  | 0.1 | 0.593499 | 0.544554 | 1 | 1 | 1 |
| M738T484 | 2.240689 | 0.04078  | 0.1 | 0.593499 | 0.544554 | 1 | 1 | 1 |
| M738T57  | 6.472234 | 0.043321 | 0.1 | 0.593499 | 0.544554 | 1 | 1 | 1 |
| M739T484 | 2.080047 | 0.008602 | 0.1 | 0.593499 | 0.544554 | 1 | 1 | 1 |
| M742T276 | 1.73623  | 0.028505 | 0.1 | 0.593499 | 0.544554 | 1 | 1 | 1 |

|          |          |          |     |          |          |   |   |   |
|----------|----------|----------|-----|----------|----------|---|---|---|
| M743T287 | 0.407949 | 0.014022 | 0.1 | 0.593499 | 0.544554 | 1 | 1 | 1 |
| M743T312 | 0.519872 | 0.002811 | 0.1 | 0.593499 | 0.544554 | 1 | 1 | 1 |
| M744T287 | 0.433575 | 0.016432 | 0.1 | 0.593499 | 0.544554 | 1 | 1 | 1 |
| M744T425 | 7.512844 | 0.027901 | 0.1 | 0.593499 | 0.544554 | 1 | 1 | 1 |
| M744T499 | 2.023583 | 0.048053 | 0.1 | 0.593499 | 0.544554 | 1 | 1 | 1 |
| M745T310 | 0.445252 | 0.036083 | 0.1 | 0.593499 | 0.544554 | 1 | 1 | 1 |
| M746T310 | 0.460134 | 0.008927 | 0.1 | 0.593499 | 0.544554 | 1 | 1 | 1 |
| M747T314 | 0.519617 | 0.007568 | 0.1 | 0.593499 | 0.544554 | 1 | 1 | 1 |
| M748T315 | 0.531523 | 0.017508 | 0.1 | 0.593499 | 0.544554 | 1 | 1 | 1 |
| M749T315 | 0.581325 | 0.010968 | 0.1 | 0.593499 | 0.544554 | 1 | 1 | 1 |
| M750T237 | 0.498276 | 0.039703 | 0.1 | 0.593499 | 0.544554 | 1 | 1 | 1 |
| M750T281 | 13.82299 | 0.039963 | 0.1 | 0.593499 | 0.544554 | 1 | 1 | 1 |
| M750T314 | 0.61579  | 0.006231 | 0.1 | 0.593499 | 0.544554 | 1 | 1 | 1 |
| M750T340 | 0.462464 | 0.012713 | 0.1 | 0.593499 | 0.544554 | 1 | 1 | 1 |
| M750T400 | 1.962051 | 0.011186 | 0.1 | 0.593499 | 0.544554 | 1 | 1 | 1 |
| M754T475 | 0.454254 | 0.039598 | 0.1 | 0.593499 | 0.544554 | 1 | 1 | 1 |
| M756T334 | 1.819714 | 0.031274 | 0.1 | 0.593499 | 0.544554 | 1 | 1 | 1 |
| M760T315 | 0.665162 | 0.015944 | 0.1 | 0.593499 | 0.544554 | 1 | 1 | 1 |
| M765T287 | 0.626614 | 0.040007 | 0.1 | 0.593499 | 0.544554 | 1 | 1 | 1 |
| M766T384 | 2.780331 | 0.048294 | 0.1 | 0.593499 | 0.544554 | 1 | 1 | 1 |
| M766T393 | 1.511628 | 0.023224 | 0.1 | 0.593499 | 0.544554 | 1 | 1 | 1 |
| M767T281 | 0.467103 | 0.02472  | 0.1 | 0.593499 | 0.544554 | 1 | 1 | 1 |
| M768T281 | 0.498054 | 0.018323 | 0.1 | 0.593499 | 0.544554 | 1 | 1 | 1 |
| M768T401 | 3.144032 | 0.034894 | 0.1 | 0.593499 | 0.544554 | 1 | 1 | 1 |
| M769T258 | 0.55753  | 0.032244 | 0.1 | 0.593499 | 0.544554 | 1 | 1 | 1 |
| M770T258 | 0.347891 | 0.002273 | 0.1 | 0.593499 | 0.544554 | 1 | 1 | 1 |
| M772T316 | 0.435185 | 0.034148 | 0.1 | 0.593499 | 0.544554 | 1 | 1 | 1 |
| M773T287 | 0.656683 | 0.038206 | 0.1 | 0.593499 | 0.544554 | 1 | 1 | 1 |
| M773T320 | 0.491456 | 0.004971 | 0.1 | 0.593499 | 0.544554 | 1 | 1 | 1 |
| M774T287 | 0.650735 | 0.049201 | 0.1 | 0.593499 | 0.544554 | 1 | 1 | 1 |
| M774T320 | 0.508768 | 0.001576 | 0.1 | 0.593499 | 0.544554 | 1 | 1 | 1 |
| M775T320 | 0.390279 | 0.001251 | 0.1 | 0.593499 | 0.544554 | 1 | 1 | 1 |
| M775T323 | 0.634451 | 0.020128 | 0.1 | 0.593499 | 0.544554 | 1 | 1 | 1 |
| M776T343 | 0.530155 | 0.00839  | 0.1 | 0.593499 | 0.544554 | 1 | 1 | 1 |
| M780T226 | 0.498363 | 0.018675 | 0.1 | 0.593499 | 0.544554 | 1 | 1 | 1 |
| M781T364 | 0.348256 | 0.001342 | 0.1 | 0.593499 | 0.544554 | 1 | 1 | 1 |
| M781T426 | 5.96052  | 0.043758 | 0.1 | 0.593499 | 0.544554 | 1 | 1 | 1 |
| M782T363 | 0.317132 | 0.000851 | 0.1 | 0.593499 | 0.544554 | 1 | 1 | 1 |
| M784T358 | 0.577785 | 0.042922 | 0.1 | 0.593499 | 0.544554 | 1 | 1 | 1 |
| M785T184 | 0.345581 | 0.048812 | 0.1 | 0.593499 | 0.544554 | 1 | 1 | 1 |
| M785T352 | 0.591134 | 0.01154  | 0.1 | 0.593499 | 0.544554 | 1 | 1 | 1 |
| M792T399 | 2.556018 | 0.046755 | 0.1 | 0.593499 | 0.544554 | 1 | 1 | 1 |
| M793T237 | 0.408973 | 0.024087 | 0.1 | 0.593499 | 0.544554 | 1 | 1 | 1 |
| M793T243 | 0.376078 | 0.038748 | 0.1 | 0.593499 | 0.544554 | 1 | 1 | 1 |
| M793T284 | 0.50849  | 0.048462 | 0.1 | 0.593499 | 0.544554 | 1 | 1 | 1 |
| M793T352 | 0.647724 | 0.044923 | 0.1 | 0.593499 | 0.544554 | 1 | 1 | 1 |
| M793T433 | 2.07701  | 0.035042 | 0.1 | 0.593499 | 0.544554 | 1 | 1 | 1 |
| M794T284 | 0.549801 | 0.038652 | 0.1 | 0.593499 | 0.544554 | 1 | 1 | 1 |
| M794T352 | 0.533614 | 0.01456  | 0.1 | 0.593499 | 0.544554 | 1 | 1 | 1 |
| M796T345 | 0.641253 | 0.040363 | 0.1 | 0.593499 | 0.544554 | 1 | 1 | 1 |
| M796T374 | 0.540438 | 0.044673 | 0.1 | 0.593499 | 0.544554 | 1 | 1 | 1 |
| M798T271 | 1.511959 | 0.008171 | 0.1 | 0.593499 | 0.544554 | 1 | 1 | 1 |
| M799T316 | 0.498962 | 0.015102 | 0.1 | 0.593499 | 0.544554 | 1 | 1 | 1 |
| M800T337 | 0.480152 | 0.008939 | 0.1 | 0.593499 | 0.544554 | 1 | 1 | 1 |
| M800T454 | 6.533502 | 0.03445  | 0.1 | 0.593499 | 0.544554 | 1 | 1 | 1 |
| M801T337 | 0.47705  | 0.011076 | 0.1 | 0.593499 | 0.544554 | 1 | 1 | 1 |
| M802T213 | 0.38755  | 0.030044 | 0.1 | 0.593499 | 0.544554 | 1 | 1 | 1 |
| M802T336 | 0.505095 | 0.030956 | 0.1 | 0.593499 | 0.544554 | 1 | 1 | 1 |

|          |          |          |     |          |          |   |   |   |
|----------|----------|----------|-----|----------|----------|---|---|---|
| M803T336 | 0.524014 | 0.027652 | 0.1 | 0.593499 | 0.544554 | 1 | 1 | 1 |
| M804T228 | 0.330521 | 0.021461 | 0.1 | 0.593499 | 0.544554 | 1 | 1 | 1 |
| M804T258 | 0.35954  | 0.004404 | 0.1 | 0.593499 | 0.544554 | 1 | 1 | 1 |
| M805T227 | 0.372313 | 0.006559 | 0.1 | 0.593499 | 0.544554 | 1 | 1 | 1 |
| M807T258 | 0.359934 | 0.014592 | 0.1 | 0.593499 | 0.544554 | 1 | 1 | 1 |
| M808T258 | 0.353764 | 0.022161 | 0.1 | 0.593499 | 0.544554 | 1 | 1 | 1 |
| M811T296 | 0.597364 | 0.031769 | 0.1 | 0.593499 | 0.544554 | 1 | 1 | 1 |
| M812T296 | 0.607952 | 0.02864  | 0.1 | 0.593499 | 0.544554 | 1 | 1 | 1 |
| M812T323 | 0.495583 | 0.003453 | 0.1 | 0.593499 | 0.544554 | 1 | 1 | 1 |
| M812T346 | 0.608391 | 0.004598 | 0.1 | 0.593499 | 0.544554 | 1 | 1 | 1 |
| M813T323 | 0.523475 | 0.003733 | 0.1 | 0.593499 | 0.544554 | 1 | 1 | 1 |
| M813T346 | 0.529668 | 0.01903  | 0.1 | 0.593499 | 0.544554 | 1 | 1 | 1 |
| M814T323 | 0.567015 | 0.007449 | 0.1 | 0.593499 | 0.544554 | 1 | 1 | 1 |
| M814T345 | 0.625519 | 0.029062 | 0.1 | 0.593499 | 0.544554 | 1 | 1 | 1 |
| M815T323 | 0.540063 | 0.038997 | 0.1 | 0.593499 | 0.544554 | 1 | 1 | 1 |
| M815T345 | 0.632074 | 0.024551 | 0.1 | 0.593499 | 0.544554 | 1 | 1 | 1 |
| M816T345 | 0.644142 | 0.035555 | 0.1 | 0.593499 | 0.544554 | 1 | 1 | 1 |
| M819T280 | 0.420761 | 0.025104 | 0.1 | 0.593499 | 0.544554 | 1 | 1 | 1 |
| M820T315 | 0.638261 | 0.001577 | 0.1 | 0.593499 | 0.544554 | 1 | 1 | 1 |
| M821T258 | 0.449346 | 0.023356 | 0.1 | 0.593499 | 0.544554 | 1 | 1 | 1 |
| M821T363 | 0.303153 | 0.003417 | 0.1 | 0.593499 | 0.544554 | 1 | 1 | 1 |
| M822T337 | 0.506817 | 0.027204 | 0.1 | 0.593499 | 0.544554 | 1 | 1 | 1 |
| M823T337 | 0.491314 | 0.017119 | 0.1 | 0.593499 | 0.544554 | 1 | 1 | 1 |
| M825T239 | 110.571  | 0.018019 | 0.1 | 0.593499 | 0.544554 | 1 | 1 | 1 |
| M825T342 | 0.453318 | 0.046671 | 0.1 | 0.593499 | 0.544554 | 1 | 1 | 1 |
| M828T224 | 0.261354 | 0.038097 | 0.1 | 0.593499 | 0.544554 | 1 | 1 | 1 |
| M829T258 | 0.498016 | 0.015191 | 0.1 | 0.593499 | 0.544554 | 1 | 1 | 1 |
| M830T258 | 0.488326 | 0.009821 | 0.1 | 0.593499 | 0.544554 | 1 | 1 | 1 |
| M832T237 | 0.357686 | 0.048851 | 0.1 | 0.593499 | 0.544554 | 1 | 1 | 1 |
| M832T333 | 0.65871  | 0.039759 | 0.1 | 0.593499 | 0.544554 | 1 | 1 | 1 |
| M833T236 | 0.468881 | 0.035771 | 0.1 | 0.593499 | 0.544554 | 1 | 1 | 1 |
| M833T333 | 0.623112 | 0.03269  | 0.1 | 0.593499 | 0.544554 | 1 | 1 | 1 |
| M833T351 | 0.64566  | 0.010771 | 0.1 | 0.593499 | 0.544554 | 1 | 1 | 1 |
| M834T323 | 0.591822 | 0.019277 | 0.1 | 0.593499 | 0.544554 | 1 | 1 | 1 |
| M835T262 | 0.522232 | 0.045577 | 0.1 | 0.593499 | 0.544554 | 1 | 1 | 1 |
| M835T323 | 0.594075 | 0.014624 | 0.1 | 0.593499 | 0.544554 | 1 | 1 | 1 |
| M836T309 | 1.622053 | 0.045208 | 0.1 | 0.593499 | 0.544554 | 1 | 1 | 1 |
| M836T373 | 0.634491 | 0.040705 | 0.1 | 0.593499 | 0.544554 | 1 | 1 | 1 |
| M840T243 | 78.04586 | 0.01211  | 0.1 | 0.593499 | 0.544554 | 1 | 1 | 1 |
| M840T348 | 0.589413 | 0.033085 | 0.1 | 0.593499 | 0.544554 | 1 | 1 | 1 |
| M841T348 | 0.554411 | 0.0128   | 0.1 | 0.593499 | 0.544554 | 1 | 1 | 1 |
| M846T256 | 0.541968 | 0.048919 | 0.1 | 0.593499 | 0.544554 | 1 | 1 | 1 |
| M846T284 | 0.467362 | 0.009518 | 0.1 | 0.593499 | 0.544554 | 1 | 1 | 1 |
| M847T322 | 2.24962  | 0.027566 | 0.1 | 0.593499 | 0.544554 | 1 | 1 | 1 |
| M848T242 | 34.25883 | 0.042107 | 0.1 | 0.593499 | 0.544554 | 1 | 1 | 1 |
| M849T319 | 0.353274 | 0.029067 | 0.1 | 0.593499 | 0.544554 | 1 | 1 | 1 |
| M851T310 | 2.024148 | 0.007111 | 0.1 | 0.593499 | 0.544554 | 1 | 1 | 1 |
| M854T349 | 0.433947 | 0.038949 | 0.1 | 0.593499 | 0.544554 | 1 | 1 | 1 |
| M856T369 | 0.490814 | 0.048497 | 0.1 | 0.593499 | 0.544554 | 1 | 1 | 1 |
| M858T267 | 2.513727 | 0.043072 | 0.1 | 0.593499 | 0.544554 | 1 | 1 | 1 |
| M861T277 | 45.93709 | 0.024863 | 0.1 | 0.593499 | 0.544554 | 1 | 1 | 1 |
| M864T474 | 3.188264 | 0.047067 | 0.1 | 0.593499 | 0.544554 | 1 | 1 | 1 |
| M865T467 | 2.956862 | 0.031866 | 0.1 | 0.593499 | 0.544554 | 1 | 1 | 1 |
| M871T483 | 2.925601 | 0.033392 | 0.1 | 0.593499 | 0.544554 | 1 | 1 | 1 |
| M877T344 | 0.343559 | 0.030063 | 0.1 | 0.593499 | 0.544554 | 1 | 1 | 1 |
| M877T479 | 2.386593 | 0.039474 | 0.1 | 0.593499 | 0.544554 | 1 | 1 | 1 |
| M877T525 | 1.542309 | 0.008665 | 0.1 | 0.593499 | 0.544554 | 1 | 1 | 1 |
| M878T295 | 2.3844   | 0.020574 | 0.1 | 0.593499 | 0.544554 | 1 | 1 | 1 |

|          |          |          |     |          |          |   |   |   |
|----------|----------|----------|-----|----------|----------|---|---|---|
| M878T344 | 0.330228 | 0.018991 | 0.1 | 0.593499 | 0.544554 | 1 | 1 | 1 |
| M880T478 | 2.225292 | 0.034907 | 0.1 | 0.593499 | 0.544554 | 1 | 1 | 1 |
| M884T280 | 43.53897 | 0.026868 | 0.1 | 0.593499 | 0.544554 | 1 | 1 | 1 |
| M887T302 | 1.622523 | 0.038959 | 0.1 | 0.593499 | 0.544554 | 1 | 1 | 1 |
| M890T256 | 0.529569 | 0.009234 | 0.1 | 0.593499 | 0.544554 | 1 | 1 | 1 |
| M894T459 | 2.02615  | 0.0201   | 0.1 | 0.593499 | 0.544554 | 1 | 1 | 1 |
| M896T282 | 12.18692 | 0.039688 | 0.1 | 0.593499 | 0.544554 | 1 | 1 | 1 |
| M897T310 | 2.611834 | 0.045082 | 0.1 | 0.593499 | 0.544554 | 1 | 1 | 1 |
| M897T469 | 1.575582 | 0.046329 | 0.1 | 0.593499 | 0.544554 | 1 | 1 | 1 |
| M900T344 | 0.413407 | 0.049532 | 0.1 | 0.593499 | 0.544554 | 1 | 1 | 1 |
| M901T336 | 0.333063 | 0.044322 | 0.1 | 0.593499 | 0.544554 | 1 | 1 | 1 |
| M902T248 | 7.703587 | 0.009464 | 0.1 | 0.593499 | 0.544554 | 1 | 1 | 1 |
| M905T322 | 3.143854 | 0.049951 | 0.1 | 0.593499 | 0.544554 | 1 | 1 | 1 |
| M908T283 | 11.62555 | 0.012389 | 0.1 | 0.593499 | 0.544554 | 1 | 1 | 1 |
| M915T370 | 2.226187 | 0.03269  | 0.1 | 0.593499 | 0.544554 | 1 | 1 | 1 |
| M919T284 | 42.69699 | 0.042218 | 0.1 | 0.593499 | 0.544554 | 1 | 1 | 1 |
| M919T285 | 41.84278 | 0.044096 | 0.1 | 0.593499 | 0.544554 | 1 | 1 | 1 |
| M922T424 | 2.052355 | 0.048158 | 0.1 | 0.593499 | 0.544554 | 1 | 1 | 1 |
| M923T229 | 9.608232 | 0.023472 | 0.1 | 0.593499 | 0.544554 | 1 | 1 | 1 |
| M930T309 | 3.058545 | 0.035173 | 0.1 | 0.593499 | 0.544554 | 1 | 1 | 1 |
| M941T260 | 19.50602 | 0.018965 | 0.1 | 0.593499 | 0.544554 | 1 | 1 | 1 |
| M944T309 | 1.745405 | 0.028649 | 0.1 | 0.593499 | 0.544554 | 1 | 1 | 1 |
| M951T344 | 0.215721 | 0.002691 | 0.1 | 0.593499 | 0.544554 | 1 | 1 | 1 |
| M954T317 | 0.348762 | 0.0255   | 0.1 | 0.593499 | 0.544554 | 1 | 1 | 1 |
| M955T337 | 0.502084 | 0.02761  | 0.1 | 0.593499 | 0.544554 | 1 | 1 | 1 |
| M956T337 | 0.586692 | 0.010446 | 0.1 | 0.593499 | 0.544554 | 1 | 1 | 1 |
| M967T224 | 21.93492 | 0.038982 | 0.1 | 0.593499 | 0.544554 | 1 | 1 | 1 |
| M970T301 | 0.600506 | 0.000292 | 0.1 | 0.593499 | 0.544554 | 1 | 1 | 1 |
| M973T337 | 0.588214 | 0.042368 | 0.1 | 0.593499 | 0.544554 | 1 | 1 | 1 |
| M980T228 | 540.9661 | 0.03453  | 0.1 | 0.593499 | 0.544554 | 1 | 1 | 1 |
| M981T228 | 162.3644 | 0.036574 | 0.1 | 0.593499 | 0.544554 | 1 | 1 | 1 |
| M990T259 | 0.459981 | 0.012108 | 0.1 | 0.593499 | 0.544554 | 1 | 1 | 1 |
| M993T317 | 0.427343 | 0.005926 | 0.1 | 0.593499 | 0.544554 | 1 | 1 | 1 |
| M994T296 | 0.328953 | 0.02434  | 0.1 | 0.593499 | 0.544554 | 1 | 1 | 1 |
| M995T337 | 0.457312 | 0.034403 | 0.1 | 0.593499 | 0.544554 | 1 | 1 | 1 |
| M996T338 | 0.265662 | 0.012885 | 0.1 | 0.593499 | 0.544554 | 1 | 1 | 1 |

| sample    | rawCV    | cv       | regulated | QC_1     | QC_2     | QC_3     | QC_4     | QC_5     |
|-----------|----------|----------|-----------|----------|----------|----------|----------|----------|
| VPA:Contr | 0.07878  | 0.077657 | up        | 4304.935 | 3475.001 | 3705.209 | 3408.468 | 3737.968 |
| VPA:Contr | 0.085429 | 0.068787 | down      | 2412.405 | 2443.82  | 2615.004 | 2715.148 | 2177.63  |
| VPA:Contr | 0.104361 | 0.09291  | up        | 1829.016 | 2127.766 | 1966.272 | 1554.658 | 1966.809 |
| VPA:Contr | 0.603635 | 0.285894 | down      | 1253.232 | 844.248  | 1960.113 | 1034.68  | 1109.963 |
| VPA:Contr | 0.232292 | 1.91E-11 | down      | 3446.332 | 3446.332 | 3446.332 | 3446.332 | 3446.332 |
| VPA:Contr | 0.196863 | 0.181803 | up        | 1722.296 | 1865.354 | 2555.229 | 1477.963 | 2135.656 |
| VPA:Contr | 0.125563 | 0.093223 | up        | 1583.906 | 1940.225 | 1679.179 | 1888.215 | 1612.56  |
| VPA:Contr | 0.216712 | 1.92E-12 | down      | 1878.168 | 1878.168 | 1878.168 | 1878.168 | 1878.168 |
| VPA:Contr | 0.286377 | 0.199894 | down      | 1231.444 | 1317.676 | 1584.598 | 791.278  | 1482.014 |
| VPA:Contr | 0.140131 | 0.134623 | up        | 1115.741 | 934.7094 | 1333.133 | 1000.068 | 1156.122 |
| VPA:Contr | 0.185805 | 0.158052 | down      | 2299.222 | 1882.793 | 1679.282 | 1665.253 | 1493.34  |
| VPA:Contr | 0.168524 | 0.087724 | up        | 2266.137 | 2511.447 | 1853.241 | 2331.24  | 2267.415 |
| VPA:Contr | 0.24702  | 0.2289   | up        | 1708.723 | 2634.143 | 2441.072 | 1315.047 | 2039.178 |
| VPA:Contr | 0.104495 | 0.048181 | up        | 7611.696 | 7420.455 | 8432.788 | 7254.645 | 7655.056 |
| VPA:Contr | 0.187978 | 0.145204 | up        | 1716.452 | 1213.898 | 1511.836 | 1115.328 | 1539.794 |
| VPA:Contr | 0.26113  | 0.096188 | down      | 676.1948 | 713.9579 | 781.1004 | 572.7838 | 760.081  |
| VPA:Contr | 0.274996 | 0.145424 | down      | 2790.585 | 2880.396 | 3824.75  | 2383.828 | 3089.463 |
| VPA:Contr | 0.176707 | 9.92E-12 | down      | 2477.076 | 2477.076 | 2477.076 | 2477.076 | 2477.076 |
| VPA:Contr | 0.134109 | 0.133815 | down      | 2412.898 | 1699.054 | 1690.975 | 1908.973 | 1707.516 |
| VPA:Contr | 0.266236 | 7.55E-12 | down      | 2453.364 | 2453.364 | 2453.364 | 2453.364 | 2453.364 |
| VPA:Contr | 0.329226 | 0.227018 | down      | 1071.671 | 1064.077 | 1078.914 | 823.3916 | 1273.42  |
| VPA:Contr | 0.318712 | 1.22E-12 | up        | 10129.77 | 10129.77 | 10129.77 | 10129.77 | 10129.77 |
| VPA:Contr | 0.196124 | 0.193735 | down      | 4040.024 | 2725.799 | 4494.375 | 2853.62  | 3691.705 |
| VPA:Contr | 0.356804 | 0.296016 | down      | 778.6411 | 1171.711 | 700.48   | 517.2791 | 1103.473 |
| VPA:Contr | 0.07534  | 0.065168 | down      | 57828.71 | 47054.52 | 52712.77 | 55058.97 | 50767.94 |
| VPA:Contr | 0.050061 | 0.039367 | down      | 50834.52 | 48082.03 | 49242.84 | 47035.77 | 45235.36 |
| VPA:Contr | 0.101112 | 0.100909 | down      | 38688.36 | 33649.52 | 28503.28 | 31542.7  | 37487.93 |
| VPA:Contr | 0.395247 | 0.274504 | down      | 10559.53 | 7226.541 | 11352    | 16656.17 | 8914.781 |
| VPA:Contr | 0.227687 | 0.140534 | down      | 6053.472 | 6498.757 | 7278.69  | 5673.308 | 8506.323 |
| VPA:Contr | 0.141793 | 0.129362 | down      | 5269.34  | 4105.177 | 4643.016 | 5309.253 | 4224.375 |
| VPA:Contr | 0.136876 | 0.136881 | down      | 7005.249 | 4551.425 | 5926.685 | 5995.11  | 6809.462 |
| VPA:Contr | 0.126358 | 0.083306 | down      | 9683.517 | 7967.474 | 8063.639 | 8855.137 | 8854.321 |
| VPA:Contr | 0.104548 | 0.07732  | down      | 24133.47 | 21685.46 | 18944.3  | 23771.83 | 21487.47 |
| VPA:Contr | 0.055719 | 0.054598 | down      | 21846.78 | 19636.24 | 20447.66 | 22360.23 | 19176.4  |
| VPA:Contr | 0.077883 | 0.036176 | down      | 15371.8  | 15635.54 | 14220.47 | 16039.57 | 15223.37 |
| VPA:Contr | 0.086486 | 0.083416 | down      | 26140.88 | 27403.55 | 29838.47 | 30714.76 | 24057.7  |
| VPA:Contr | 0.140829 | 0.129311 | down      | 6534.115 | 7841.483 | 6511.157 | 6394.151 | 5716.177 |
| VPA:Contr | 0.090146 | 0.087777 | down      | 4474.302 | 4999.835 | 3725.163 | 4754.574 | 4534.113 |
| VPA:Contr | 0.389418 | 3.10E-12 | down      | 1866.596 | 1866.596 | 1866.596 | 1866.596 | 1866.596 |
| VPA:Contr | 0.158413 | 0.131008 | down      | 2423.555 | 1693.596 | 2491.776 | 2581.511 | 2168.6   |
| VPA:Contr | 0.327498 | 2.58E-09 | up        | 7124.84  | 7124.84  | 7124.84  | 7124.84  | 7124.84  |
| VPA:Contr | 0.320978 | 0.198815 | down      | 16506.89 | 19780.15 | 15108.88 | 15724.04 | 25635.69 |
| VPA:Contr | 0.296117 | 0.222005 | down      | 11184.12 | 19939.89 | 11886.64 | 12793.84 | 11925.58 |
| VPA:Contr | 0.093442 | 0.053129 | up        | 1078.503 | 1076.353 | 1193.689 | 1013.038 | 1121.069 |
| VPA:Contr | 0.126708 | 0.101867 | down      | 8720.661 | 9485.53  | 8812.862 | 11583.23 | 9619.661 |
| VPA:Contr | 0.068136 | 0.061259 | down      | 5653.084 | 5427.553 | 4724.854 | 5750.574 | 5487.605 |
| VPA:Contr | 0.293815 | 1.74E-13 | up        | 74639.74 | 74639.74 | 74639.74 | 74639.74 | 74639.74 |
| VPA:Contr | 0.183637 | 0.088962 | up        | 1191.411 | 1401.257 | 1224.045 | 1030.848 | 1256.603 |
| VPA:Contr | 0.054797 | 0.053776 | down      | 8028.595 | 8223.557 | 7930.415 | 8857.015 | 7384.028 |
| VPA:Contr | 0.093223 | 0.066242 | down      | 4065.73  | 3726.3   | 3738.073 | 4429.262 | 3696.819 |
| VPA:Contr | 0.741938 | 3.10E-09 | up        | 1910.078 | 1910.078 | 1910.078 | 1910.078 | 1910.078 |
| VPA:Contr | 0.161056 | 0.152682 | down      | 6700.414 | 5141.508 | 5354.387 | 7601.395 | 5163.117 |
| VPA:Contr | 0.692665 | 2.76E-11 | up        | 13611.7  | 13611.7  | 13611.7  | 13611.7  | 13611.7  |
| VPA:Contr | 0.227234 | 5.01E-12 | down      | 3716.689 | 3716.689 | 3716.689 | 3716.689 | 3716.689 |
| VPA:Contr | 0.191547 | 0.197065 | down      | 1172.446 | 1079.101 | 1250.944 | 1279.282 | 1471.952 |
| VPA:Contr | 0.429105 | 1.66E-11 | up        | 1497.355 | 1497.355 | 1497.355 | 1497.355 | 1497.355 |
| VPA:Contr | 0.499735 | 0.211255 | up        | 775.8554 | 871.5176 | 644.8437 | 446.1957 | 908.635  |



|           |          |          |      |          |          |          |          |          |
|-----------|----------|----------|------|----------|----------|----------|----------|----------|
| VPA:Contr | 0.050659 | 0.050638 | down | 251497.2 | 255713.4 | 242197.7 | 272727.9 | 255322.8 |
| VPA:Contr | 0.064573 | 3.03E-12 | down | 81900.3  | 81900.3  | 81900.3  | 81900.3  | 81900.3  |
| VPA:Contr | 0.136074 | 0.070428 | down | 3575.976 | 3454.151 | 4134.422 | 3310.984 | 3642.773 |
| VPA:Contr | 0.211302 | 5.32E-12 | down | 1306.497 | 1306.497 | 1306.497 | 1306.497 | 1306.497 |
| VPA:Contr | 0.227071 | 0.162517 | down | 3108.187 | 3023.441 | 3304.657 | 4590.446 | 3095.082 |
| VPA:Contr | 0.182035 | 0.172193 | up   | 4673.403 | 3961.415 | 6216.213 | 4231.598 | 4516.112 |
| VPA:Contr | 0.138721 | 0.118991 | down | 1469.018 | 1500.347 | 1281.464 | 1103.709 | 1620.182 |
| VPA:Contr | 0.250384 | 2.49E-12 | up   | 1467.076 | 1467.076 | 1467.076 | 1467.076 | 1467.076 |
| VPA:Contr | 0.157823 | 0.11481  | down | 3396.755 | 2772.784 | 2631.79  | 3126.156 | 2444.932 |
| VPA:Contr | 0.279237 | 0.182154 | down | 1845.982 | 1785.944 | 1214.837 | 1413.4   | 2064.05  |
| VPA:Contr | 0.10937  | 0.046249 | up   | 9356.19  | 9751.521 | 9242.432 | 9715.286 | 10586.53 |
| VPA:Contr | 0.105894 | 0.014176 | up   | 4931.304 | 5001.084 | 4789.603 | 4997.218 | 4935.718 |
| VPA:Contr | 0.117793 | 0.11733  | up   | 2271.083 | 2583.93  | 1756.873 | 2013.436 | 2224.092 |
| VPA:Contr | 0.070522 | 0.051155 | down | 18538.58 | 16165.09 | 18005.35 | 18509.26 | 17527.95 |
| VPA:Contr | 0.107737 | 0.104078 | down | 6418.008 | 6275.913 | 5643.166 | 6546.212 | 6056.266 |
| VPA:Contr | 0.152863 | 0.140885 | down | 1689.547 | 1895.684 | 1370.925 | 1272.623 | 1835.721 |
| VPA:Contr | 0.28881  | 3.63E-11 | up   | 2809.487 | 2809.487 | 2809.487 | 2809.487 | 2809.487 |
| VPA:Contr | 0.153747 | 0.146205 | down | 8930.923 | 5709.601 | 8034.841 | 7979.117 | 7166.5   |
| VPA:Contr | 0.235303 | 0.13035  | up   | 1279.044 | 1625.01  | 1215.668 | 1346.134 | 1414.042 |
| VPA:Contr | 0.151027 | 5.05E-12 | down | 2952.555 | 2952.555 | 2952.555 | 2952.555 | 2952.555 |
| VPA:Contr | 0.100115 | 0.07943  | up   | 1550.331 | 1384.105 | 1229.113 | 1351.512 | 1543.873 |
| VPA:Contr | 0.297743 | 1.31E-11 | up   | 3672.675 | 3672.675 | 3672.675 | 3672.675 | 3672.675 |
| VPA:Contr | 0.317717 | 0.028518 | up   | 3262.406 | 3196.946 | 3190.253 | 3428.958 | 3135.959 |
| VPA:Contr | 0.129133 | 0.06214  | down | 1834.393 | 1842.788 | 2015.329 | 2074.677 | 2117.027 |
| VPA:Contr | 0.202432 | 0.114002 | down | 1419.953 | 1316.282 | 1482.842 | 1216.372 | 1735.699 |
| VPA:Contr | 0.155444 | 0.115853 | up   | 2334.361 | 2117.205 | 2191.176 | 2159.859 | 2898.797 |
| VPA:Contr | 0.060853 | 0.054014 | down | 15780.03 | 14707.49 | 16089.57 | 14746.04 | 17140.87 |
| VPA:Contr | 0.223595 | 1.32E-11 | up   | 7898.995 | 7898.995 | 7898.995 | 7898.995 | 7898.995 |
| VPA:Contr | 0.117932 | 0.117473 | down | 1013.654 | 909.9027 | 907.4904 | 1170.359 | 815.5678 |
| VPA:Contr | 0.272048 | 0.208746 | down | 13843.49 | 12448.45 | 12910.74 | 8054.924 | 15924.1  |
| VPA:Contr | 0.346385 | 0.02856  | up   | 1704.852 | 1796.932 | 1634.935 | 1753.923 | 1723.515 |
| VPA:Contr | 0.058797 | 0.056623 | down | 29292.66 | 28954.35 | 28336.84 | 33228.57 | 28556.14 |
| VPA:Contr | 0.076759 | 0.074114 | down | 9253.168 | 8429.762 | 10050.58 | 10638.01 | 9368.747 |
| VPA:Contr | 0.080577 | 0.062137 | up   | 2835.712 | 2470.694 | 2578.999 | 2499.333 | 2855.616 |
| VPA:Contr | 0.215141 | 0.179367 | down | 1232.274 | 1097.389 | 1785.106 | 1502.359 | 1118.529 |
| VPA:Contr | 0.112931 | 0.06762  | up   | 5410.327 | 5058.952 | 4901.499 | 5751.279 | 4741.168 |
| VPA:Contr | 0.087164 | 0.021009 | up   | 19880.1  | 20842.35 | 19425.8  | 20218.85 | 20116.89 |
| VPA:Contr | 0.141737 | 3.00E-12 | down | 8074.145 | 8074.145 | 8074.145 | 8074.145 | 8074.145 |
| VPA:Contr | 0.118966 | 0.060694 | down | 2622.033 | 2501.571 | 2296.573 | 2538.962 | 2813.403 |
| VPA:Contr | 0.066609 | 0.061565 | down | 16514.21 | 15647.37 | 18991.98 | 17037.94 | 17512.65 |
| VPA:Contr | 0.035984 | 0.022605 | down | 31111.45 | 30867.09 | 31280.98 | 32385.24 | 30026.29 |
| VPA:Contr | 0.118126 | 0.091399 | down | 10927.64 | 11933.3  | 10699.09 | 12912.18 | 9857.357 |
| VPA:Contr | 0.23562  | 0.232964 | down | 1852.685 | 1155.829 | 1546.635 | 1431.246 | 1034.561 |
| VPA:Contr | 0.237412 | 2.48E-11 | up   | 23024.07 | 23024.07 | 23024.07 | 23024.07 | 23024.07 |
| VPA:Contr | 0.185731 | 0.171082 | down | 3047.887 | 4623.087 | 3401.403 | 3550.604 | 3048.119 |
| VPA:Contr | 0.298662 | 1.87E-11 | down | 1371.9   | 1371.9   | 1371.9   | 1371.9   | 1371.9   |
| VPA:Contr | 0.030089 | 0.030042 | down | 1325401  | 1248102  | 1331478  | 1323478  | 1275682  |
| VPA:Contr | 0.038703 | 0.022257 | down | 342997.2 | 341605.3 | 330564.5 | 356693.5 | 340927   |
| VPA:Contr | 0.149454 | 4.29E-12 | up   | 12707.82 | 12707.82 | 12707.82 | 12707.82 | 12707.82 |
| VPA:Contr | 0.251312 | 1.25E-12 | up   | 26270.03 | 26270.03 | 26270.03 | 26270.03 | 26270.03 |
| VPA:Contr | 0.067815 | 1.47E-12 | down | 70952.63 | 70952.63 | 70952.63 | 70952.63 | 70952.63 |
| VPA:Contr | 0.083839 | 0.076183 | down | 8882.308 | 8144.615 | 7676.658 | 7721.979 | 7195.499 |
| VPA:Contr | 0.120117 | 0.092325 | down | 10970.38 | 13162.66 | 11264.07 | 9676.084 | 10936.57 |
| VPA:Contr | 0.067984 | 0.053712 | down | 6115.346 | 5965.012 | 5659.099 | 6249.318 | 5308.939 |
| VPA:Contr | 0.208329 | 0.113304 | down | 6398.647 | 6013.303 | 7373.326 | 5116.524 | 7012.126 |
| VPA:Contr | 0.258977 | 0.186309 | up   | 2611.396 | 3355.347 | 2688.485 | 1704.95  | 2940.695 |
| VPA:Contr | 0.224972 | 0.213597 | down | 1360.056 | 1320.696 | 1985.253 | 1310.821 | 980.4228 |
| VPA:Contr | 0.381272 | 3.14E-12 | up   | 4084.724 | 4084.724 | 4084.724 | 4084.724 | 4084.724 |

|           |          |          |      |          |          |          |          |          |
|-----------|----------|----------|------|----------|----------|----------|----------|----------|
| VPA:Contr | 0.441064 | 3.46E-08 | down | 1408.634 | 1408.634 | 1408.634 | 1408.634 | 1408.634 |
| VPA:Contr | 0.283921 | 0.017019 | down | 1519.164 | 1541.488 | 1586.851 | 1501.481 | 1540.173 |
| VPA:Contr | 0.209289 | 9.01E-12 | down | 1682.992 | 1682.992 | 1682.992 | 1682.992 | 1682.992 |
| VPA:Contr | 0.198971 | 4.31E-12 | up   | 883.2689 | 883.2689 | 883.2689 | 883.2689 | 883.2689 |
| VPA:Contr | 0.396186 | 4.38E-11 | down | 2343.112 | 2343.112 | 2343.112 | 2343.112 | 2343.112 |
| VPA:Contr | 0.231032 | 3.94E-12 | up   | 4996.521 | 4996.521 | 4996.521 | 4996.521 | 4996.521 |
| VPA:Contr | 0.135146 | 0.073786 | up   | 758.4641 | 967.7146 | 845.4132 | 857.7632 | 823.9595 |
| VPA:Contr | 0.254833 | 0.251478 | up   | 2587.021 | 1651.674 | 2430.685 | 2985.793 | 1359.989 |
| VPA:Contr | 0.036501 | 0.021298 | down | 147972.7 | 143757   | 146178.8 | 152198.8 | 142586.2 |
| VPA:Contr | 0.031647 | 0.017795 | down | 45455.59 | 43734.93 | 44292.32 | 45666.6  | 44315.7  |
| VPA:Contr | 0.032677 | 0.02626  | down | 204886.8 | 198457.9 | 214984.7 | 199788.1 | 202443.5 |
| VPA:Contr | 0.058446 | 0.052221 | down | 63759.34 | 58699.64 | 66939.84 | 57421.56 | 63309.46 |
| VPA:Contr | 0.158299 | 0.076362 | down | 1359.315 | 1225.318 | 1507.04  | 1511.891 | 1294.443 |
| VPA:Contr | 0.07984  | 1.93E-12 | up   | 11746.32 | 11746.32 | 11746.32 | 11746.32 | 11746.32 |
| VPA:Contr | 0.184351 | 0.161203 | down | 1522.568 | 938.2006 | 1138.99  | 1001.412 | 1234.902 |
| VPA:Contr | 0.218798 | 4.49E-12 | up   | 2135.228 | 2135.228 | 2135.228 | 2135.228 | 2135.228 |
| VPA:Contr | 0.191895 | 0.192957 | down | 3853.58  | 5179.294 | 5228.162 | 6248.606 | 3560.771 |
| VPA:Contr | 0.183334 | 0.182959 | down | 5020.273 | 5233.426 | 5989.633 | 6709.584 | 3613.45  |
| VPA:Contr | 0.250554 | 0.17864  | down | 2418.585 | 1852.451 | 3123.354 | 1952.89  | 2238.419 |
| VPA:Contr | 0.147505 | 2.30E-12 | down | 22241.8  | 22241.8  | 22241.8  | 22241.8  | 22241.8  |
| VPA:Contr | 0.112408 | 0.006677 | down | 1755.248 | 1736.196 | 1775.298 | 1747.474 | 1750.458 |
| VPA:Contr | 0.214291 | 0.18591  | up   | 2171.281 | 2343.146 | 1841.929 | 2103.499 | 3002.495 |
| VPA:Contr | 0.101327 | 0.063853 | up   | 1305.716 | 1213.388 | 1336.618 | 1167.672 | 1419.907 |
| VPA:Contr | 0.059715 | 0.037596 | up   | 33610.48 | 31288.24 | 30829.41 | 34353.69 | 32692.21 |
| VPA:Contr | 0.266131 | 0.203607 | down | 12764.19 | 10515.08 | 11368.77 | 9613.224 | 17253.34 |
| VPA:Contr | 0.051416 | 1.20E-12 | down | 24844.53 | 24844.53 | 24844.53 | 24844.53 | 24844.53 |
| VPA:Contr | 0.101434 | 0.090434 | down | 9571.398 | 7840.955 | 7771.903 | 8485.449 | 8324.576 |
| VPA:Contr | 0.196093 | 0.185456 | down | 3052.298 | 4014.214 | 4675.552 | 3037.614 | 3829.472 |
| VPA:Contr | 0.048364 | 6.73E-10 | down | 40343.27 | 40343.27 | 40343.27 | 40343.27 | 40343.27 |
| VPA:Contr | 0.039699 | 0.037192 | down | 14426.86 | 13248.93 | 14190.66 | 13184.05 | 13190.02 |
| VPA:Contr | 0.170076 | 0.124413 | up   | 4740.769 | 5000.955 | 5248.037 | 3979.97  | 5332.458 |
| VPA:Contr | 0.0998   | 0.068976 | down | 19587.79 | 22126.82 | 17921.52 | 18453.22 | 20380.24 |
| VPA:Contr | 0.117201 | 0.115956 | down | 7197.745 | 8259.416 | 6026.079 | 7259.043 | 8737.022 |
| VPA:Contr | 0.065567 | 9.96E-13 | up   | 27788.68 | 27788.68 | 27788.68 | 27788.68 | 27788.68 |
| VPA:Contr | 0.291328 | 5.87E-14 | up   | 4484.785 | 4484.785 | 4484.785 | 4484.785 | 4484.785 |
| VPA:Contr | 0.19221  | 1.73E-09 | up   | 2414.929 | 2414.929 | 2414.929 | 2414.929 | 2414.929 |
| VPA:Contr | 0.13151  | 0.120578 | down | 9070.722 | 8356.854 | 7960.665 | 8924.904 | 6533.535 |
| VPA:Contr | 0.076689 | 0.060469 | down | 3170.825 | 2842.22  | 3214.792 | 2929.031 | 2738.216 |
| VPA:Contr | 0.163058 | 0.163099 | up   | 3393.958 | 2257.951 | 2409.169 | 2686.323 | 3086.748 |
| VPA:Contr | 0.102001 | 0.071221 | down | 3202.277 | 3221.721 | 3841.109 | 3371.839 | 3115.787 |
| VPA:Contr | 0.293731 | 0.269675 | up   | 4002.824 | 4144.702 | 1521.324 | 3249.328 | 3061.919 |
| VPA:Contr | 0.390429 | 1.15E-11 | down | 10192.06 | 10192.06 | 10192.06 | 10192.06 | 10192.06 |
| VPA:Contr | 0.161634 | 0.15812  | down | 1702.598 | 2435.227 | 1863.214 | 1465.07  | 1904.635 |
| VPA:Contr | 0.048643 | 0.048389 | up   | 55602.9  | 48612.2  | 54022.82 | 55300.26 | 50951.87 |
| VPA:Contr | 0.066114 | 4.33E-12 | up   | 23865.58 | 23865.58 | 23865.58 | 23865.58 | 23865.58 |
| VPA:Contr | 0.127196 | 0.107543 | down | 1113.048 | 803.6622 | 887.2097 | 903.3983 | 845.2546 |
| VPA:Contr | 0.099871 | 0.056269 | up   | 4840.97  | 4182.337 | 4452.598 | 4501.145 | 4947.299 |
| VPA:Contr | 0.117472 | 1.42E-11 | up   | 6076.996 | 6076.996 | 6076.996 | 6076.996 | 6076.996 |
| VPA:Contr | 0.136422 | 0.039307 | down | 6329.154 | 6680.861 | 6091.63  | 6830.742 | 6241.274 |
| VPA:Contr | 0.115959 | 0.055992 | down | 3924.405 | 4276.172 | 3988.236 | 4636.284 | 4153.657 |
| VPA:Contr | 0.187271 | 0.173731 | down | 1436.612 | 1107.908 | 1592.537 | 1661.956 | 1202.627 |
| VPA:Contr | 0.167835 | 0.09454  | down | 8251.105 | 9223.179 | 8562.366 | 7117.327 | 9697.401 |
| VPA:Contr | 0.104599 | 0.101558 | down | 13972.15 | 10771.27 | 12879.99 | 12458.23 | 11291.12 |
| VPA:Contr | 0.159342 | 0.053539 | down | 1631.963 | 1524.392 | 1460.587 | 1722.633 | 1531.475 |
| VPA:Contr | 0.054336 | 0.044913 | up   | 42974.96 | 38724.08 | 41503.44 | 38117.24 | 42564.52 |
| VPA:Contr | 0.135028 | 0.132337 | up   | 1220.295 | 1461.54  | 1142.177 | 1309.305 | 1179.888 |
| VPA:Contr | 0.111186 | 0.059034 | down | 18141.37 | 18964.83 | 16195.88 | 17069.1  | 19061.03 |
| VPA:Contr | 0.238748 | 2.14E-11 | down | 1868.968 | 1868.968 | 1868.968 | 1868.968 | 1868.968 |

|           |          |          |      |          |          |          |          |          |
|-----------|----------|----------|------|----------|----------|----------|----------|----------|
| VPA:Contr | 0.199837 | 0.177568 | down | 2374.331 | 1503.223 | 2273.77  | 1634.101 | 1615.365 |
| VPA:Contr | 0.096621 | 0.081273 | up   | 4180.244 | 4174.904 | 4799.201 | 3646.106 | 4124.058 |
| VPA:Contr | 0.292337 | 0.270896 | up   | 863.8142 | 742.4552 | 1490.891 | 1301.603 | 1108.146 |
| VPA:Contr | 0.100506 | 1.07E-13 | up   | 18136.02 | 18136.02 | 18136.02 | 18136.02 | 18136.02 |
| VPA:Contr | 0.058647 | 0.045469 | up   | 13172.03 | 13720.41 | 14411.74 | 13976.45 | 15078.61 |
| VPA:Contr | 0.207733 | 0.204455 | up   | 10965.52 | 9304.775 | 15698.18 | 9579.214 | 11351.59 |
| VPA:Contr | 0.135367 | 0.132911 | up   | 829.1936 | 1118.354 | 802.2537 | 882.6926 | 1025.68  |
| VPA:Contr | 0.518745 | 0.115829 | up   | 9066.705 | 10128.77 | 7843.006 | 11194.03 | 8541.949 |
| VPA:Contr | 0.113264 | 0.108712 | down | 2525.049 | 2633.712 | 3163.589 | 2780.726 | 2215.288 |
| VPA:Contr | 0.355616 | 3.59E-11 | up   | 1038.682 | 1038.682 | 1038.682 | 1038.682 | 1038.682 |
| VPA:Contr | 0.434592 | 1.90E-11 | up   | 14386.65 | 14386.65 | 14386.65 | 14386.65 | 14386.65 |
| VPA:Contr | 0.190826 | 0.17428  | down | 5700.145 | 7219.955 | 4611.673 | 4706.776 | 4866.556 |
| VPA:Contr | 0.174915 | 0.086683 | up   | 1415.053 | 1203.737 | 1179.859 | 1506.082 | 1285.912 |
| VPA:Contr | 0.195005 | 0.170103 | down | 1154.8   | 1719.92  | 1902.757 | 1466.813 | 1874.495 |
| VPA:Contr | 0.130264 | 0.10826  | down | 13017.24 | 10046.94 | 11399.97 | 12156.94 | 9601.04  |
| VPA:Contr | 0.188826 | 0.13521  | down | 816.3884 | 653.9883 | 737.0744 | 870.9826 | 571.3377 |
| VPA:Contr | 0.128555 | 0.039302 | up   | 2803.761 | 2579.224 | 2937.43  | 2697.777 | 2739.13  |
| VPA:Contr | 0.08224  | 0.081819 | down | 11419.17 | 11477.22 | 11111.73 | 11957.81 | 9863.471 |
| VPA:Contr | 0.228559 | 0.084835 | up   | 16734.98 | 14517.35 | 19016.78 | 15400.07 | 16219.46 |
| VPA:Contr | 0.099319 | 0.0964   | up   | 7863.981 | 10147.12 | 9571.04  | 7804.638 | 9266.268 |
| VPA:Contr | 0.107826 | 0.049222 | down | 11185.08 | 11948.07 | 10467.12 | 12164.49 | 11152.83 |
| VPA:Contr | 0.206264 | 0.206834 | down | 6622.701 | 4015.943 | 7070.746 | 4884.589 | 5292.56  |
| VPA:Contr | 0.316508 | 1.31E-11 | down | 2707.335 | 2707.335 | 2707.335 | 2707.335 | 2707.335 |
| VPA:Contr | 0.19847  | 0.188559 | up   | 2227.892 | 3304.614 | 3529.294 | 3669.54  | 3966.256 |
| VPA:Contr | 0.215561 | 2.72E-10 | down | 2160.84  | 2160.84  | 2160.84  | 2160.84  | 2160.84  |
| VPA:Contr | 0.122656 | 0.079594 | down | 4587.017 | 5178.651 | 4298.036 | 5366.601 | 4473.374 |
| VPA:Contr | 0.17619  | 0.132136 | down | 7300.962 | 10549.51 | 8962.034 | 7220.391 | 8917.252 |
| VPA:Contr | 0.054287 | 0.038561 | down | 18985.12 | 17884.99 | 20157.05 | 18178.88 | 18583.19 |
| VPA:Contr | 0.135831 | 0.135854 | up   | 3278.628 | 3478.777 | 3219.571 | 4136.651 | 2868.686 |
| VPA:Contr | 0.086181 | 0.081342 | down | 10033.25 | 9708.999 | 10737.51 | 9156.311 | 11226.76 |
| VPA:Contr | 0.089636 | 0.088838 | down | 16363.3  | 14345.54 | 15274.12 | 18374.56 | 15114.26 |
| VPA:Contr | 0.040062 | 0.002785 | down | 51755.88 | 52036.38 | 51609.7  | 51976.84 | 51746.84 |
| VPA:Contr | 0.131485 | 0.049539 | up   | 12429.04 | 12811.89 | 14151.98 | 13268.41 | 12273.78 |
| VPA:Contr | 0.205331 | 0.12322  | down | 150893.7 | 129701   | 193700.8 | 163085.3 | 156183.1 |
| VPA:Contr | 0.167368 | 0.152005 | up   | 2583.612 | 3960.903 | 2600.027 | 3353.635 | 3106.211 |
| VPA:Contr | 0.069687 | 4.18E-12 | down | 25712.32 | 25712.32 | 25712.32 | 25712.32 | 25712.32 |
| VPA:Contr | 0.131539 | 0.088517 | up   | 6348.611 | 8139.405 | 6637.706 | 6470.395 | 7242.316 |
| VPA:Contr | 0.209656 | 0.123364 | down | 72381.86 | 61265.39 | 83598.6  | 84242.35 | 86365.03 |
| VPA:Contr | 0.173588 | 0.027433 | down | 2237.343 | 2336.479 | 2134.295 | 2291.819 | 2262.375 |
| VPA:Contr | 0.19692  | 0.099717 | down | 2026.52  | 1494.413 | 1976.053 | 1672.518 | 1795.218 |
| VPA:Contr | 0.040895 | 5.58E-13 | down | 167451.8 | 167451.8 | 167451.8 | 167451.8 | 167451.8 |
| VPA:Contr | 0.044104 | 0.028045 | down | 71646.54 | 71474.31 | 76443.56 | 69970.96 | 72335.41 |
| VPA:Contr | 0.083814 | 0.018937 | down | 20861.21 | 20023.36 | 20457.45 | 20022.31 | 21059.61 |
| VPA:Contr | 0.193981 | 0.194382 | up   | 8949.742 | 9990.449 | 6195.584 | 6764.137 | 10481.36 |
| VPA:Contr | 0.129985 | 0.130985 | down | 23570.19 | 21975.07 | 22175.69 | 20344.49 | 18506.22 |
| VPA:Contr | 0.129677 | 0.119556 | down | 11227.42 | 8687.554 | 9840.849 | 8634.202 | 9901.693 |
| VPA:Contr | 0.193346 | 0.187532 | down | 2548.603 | 2889.405 | 3050.028 | 2190.09  | 2964.895 |
| VPA:Contr | 0.045547 | 0.039024 | down | 352696   | 329688.3 | 376849.8 | 348984.4 | 351278.5 |
| VPA:Contr | 0.175814 | 9.87E-13 | down | 6920.734 | 6920.734 | 6920.734 | 6920.734 | 6920.734 |
| VPA:Contr | 0.047022 | 0.046319 | down | 166405.5 | 146672.9 | 162171.2 | 167542   | 158002.9 |
| VPA:Contr | 0.079596 | 0.063579 | down | 44400.28 | 42593.8  | 44827.03 | 39101.46 | 48183.5  |
| VPA:Contr | 0.043299 | 0.01871  | down | 274730   | 285912.2 | 276631.4 | 268523.2 | 279012.1 |
| VPA:Contr | 0.113547 | 1.13E-12 | up   | 1302.811 | 1302.811 | 1302.811 | 1302.811 | 1302.811 |
| VPA:Contr | 0.093293 | 0.064272 | up   | 2560.108 | 2329.835 | 2302.689 | 2500.143 | 2105.153 |
| VPA:Contr | 0.182234 | 2.08E-12 | up   | 3082.531 | 3082.531 | 3082.531 | 3082.531 | 3082.531 |
| VPA:Contr | 0.187505 | 0.105776 | up   | 763.1598 | 927.0998 | 939.8796 | 710.8127 | 937.4014 |
| VPA:Contr | 0.330458 | 3.85E-12 | up   | 2702.238 | 2702.238 | 2702.238 | 2702.238 | 2702.238 |
| VPA:Contr | 0.150938 | 0.140728 | up   | 21786.5  | 14049.69 | 17590.58 | 16047.9  | 19241.62 |

|           |          |          |      |          |          |          |          |          |
|-----------|----------|----------|------|----------|----------|----------|----------|----------|
| VPA:Contr | 0.023158 | 0.008748 | down | 919887.9 | 922386.4 | 903242.8 | 929892.9 | 915850.5 |
| VPA:Contr | 0.118495 | 0.105064 | down | 45883.62 | 40930.19 | 39947.36 | 43053.65 | 41517.44 |
| VPA:Contr | 0.032786 | 1.71E-10 | down | 392194.8 | 392194.8 | 392194.8 | 392194.8 | 392194.8 |
| VPA:Contr | 0.066814 | 0.04585  | up   | 4359.805 | 3844.327 | 4293.199 | 4456.857 | 4303.678 |
| VPA:Contr | 0.192885 | 0.121153 | up   | 1230.87  | 988.769  | 1231.891 | 983.7083 | 1183.772 |
| VPA:Contr | 0.035938 | 0.032134 | down | 201351.1 | 202513.1 | 207225.7 | 188015.7 | 202790.2 |
| VPA:Contr | 0.032875 | 0.019431 | down | 95259.42 | 94784.69 | 98864.95 | 92544.5  | 95654.12 |
| VPA:Contr | 0.018262 | 0.011974 | down | 327498.9 | 328600.4 | 323270.6 | 335816.9 | 331504.6 |
| VPA:Contr | 0.029191 | 0.009049 | down | 145110.1 | 146711.3 | 145056.1 | 147521.1 | 144253   |
| VPA:Contr | 0.120784 | 0.058881 | down | 41339.01 | 42107.04 | 43063.21 | 40190.26 | 42699.15 |
| VPA:Contr | 0.261895 | 0.184019 | down | 9332.28  | 10636.24 | 11980.55 | 6424.674 | 10968.64 |
| VPA:Contr | 0.147387 | 0.133373 | up   | 3191.546 | 3807.869 | 3465.922 | 3302.916 | 4205.107 |
| VPA:Contr | 0.168418 | 0.119202 | down | 11031.17 | 9987.976 | 13310.56 | 12149.72 | 9922.809 |
| VPA:Contr | 0.100493 | 0.007774 | down | 9204.912 | 9160.292 | 9348.465 | 9114.892 | 9216.488 |
| VPA:Contr | 0.134167 | 0.134312 | up   | 6324.902 | 6515.907 | 5098.833 | 5430.274 | 7577.312 |
| VPA:Contr | 0.074363 | 0.028716 | down | 25481.45 | 25322.81 | 24859.17 | 26943.42 | 24669.9  |
| VPA:Contr | 0.379522 | 0.241657 | up   | 3377.759 | 1737.378 | 3055.826 | 3887.223 | 2562     |
| VPA:Contr | 0.193137 | 0.050816 | down | 13951.75 | 12415.01 | 14417.48 | 14166.89 | 13014.23 |
| VPA:Contr | 0.125835 | 0.1262   | down | 38664.44 | 49963.59 | 43709.86 | 33290.13 | 40096.97 |
| VPA:Contr | 0.110155 | 0.039689 | up   | 2079.082 | 2265.204 | 2066.62  | 2008.236 | 2045.739 |
| VPA:Contr | 0.164573 | 0.151434 | up   | 4315.695 | 5889.829 | 4102.778 | 5938.175 | 4495.826 |
| VPA:Contr | 0.020097 | 0.020097 | down | 954671.9 | 911382.4 | 928774.5 | 940622.3 | 927929.9 |
| VPA:Contr | 0.032045 | 0.030545 | down | 420671   | 443009.7 | 423351.5 | 440915.8 | 455294.1 |
| VPA:Contr | 0.163173 | 0.138674 | up   | 6054.59  | 8504.238 | 6792.641 | 6042.262 | 6826.681 |
| VPA:Contr | 0.067042 | 0.064134 | down | 30317.82 | 34453.26 | 35825.85 | 30067.46 | 32747.1  |
| VPA:Contr | 0.25058  | 0.252133 | down | 25494.72 | 19641.74 | 16085.02 | 16719.65 | 16704.87 |
| VPA:Contr | 0.103217 | 9.01E-12 | down | 74160.17 | 74160.17 | 74160.17 | 74160.17 | 74160.17 |
| VPA:Contr | 0.014958 | 0.014529 | down | 666306.9 | 642311   | 660080.2 | 650762.5 | 651058.9 |
| VPA:Contr | 0.095196 | 0.014113 | down | 199848.3 | 195602.6 | 194527.2 | 202828.3 | 196589.4 |
| VPA:Contr | 0.030557 | 0.028433 | down | 313479.9 | 306656.7 | 292571.8 | 320976.6 | 311031.2 |
| VPA:Contr | 0.042586 | 0.023551 | down | 85064.49 | 92242.98 | 88322.08 | 88622.66 | 88627.27 |
| VPA:Contr | 0.230114 | 0.229654 | down | 28723.09 | 24130.13 | 29030.6  | 40158.09 | 21867.71 |
| VPA:Contr | 0.100061 | 0.093512 | down | 26183.32 | 28634.67 | 22609.15 | 26023.85 | 28892.47 |
| VPA:Contr | 0.109647 | 0.059926 | down | 14158.71 | 12935.98 | 12507.81 | 14680.32 | 12604.01 |
| VPA:Contr | 0.078476 | 0.035853 | down | 9825.762 | 9878.858 | 10360.66 | 9191.191 | 10070.31 |
| VPA:Contr | 0.087928 | 0.065702 | down | 4449.028 | 4264.077 | 3980.884 | 4880.659 | 4664.605 |
| VPA:Contr | 0.308011 | 0.293727 | up   | 1102.725 | 2193.35  | 1625.53  | 1011.656 | 2151.654 |
| VPA:Contr | 0.087403 | 0.068994 | down | 2727.587 | 2484.549 | 2936.315 | 2980.034 | 2864.335 |
| VPA:Contr | 0.312913 | 0.291049 | down | 4274.472 | 3857.759 | 4876.337 | 7949.379 | 4008.985 |
| VPA:Contr | 0.210299 | 0.166115 | down | 8676.153 | 12981.82 | 9799.665 | 9545.273 | 10975.22 |
| VPA:Contr | 0.160191 | 0.089035 | down | 9718.686 | 11270.52 | 9679.29  | 9135.079 | 8528.377 |
| VPA:Contr | 0.168743 | 0.161349 | up   | 3601.145 | 5386.031 | 4243.949 | 5521.82  | 5554.991 |
| VPA:Contr | 0.113325 | 5.70E-12 | down | 4408.577 | 4408.577 | 4408.577 | 4408.577 | 4408.577 |
| VPA:Contr | 0.10868  | 0.107844 | down | 18517.23 | 20216.29 | 24598.84 | 18011.67 | 19231.3  |
| VPA:Contr | 0.0291   | 0.008885 | down | 371325.8 | 369658.8 | 375801.2 | 365269.9 | 373753.6 |
| VPA:Contr | 0.105679 | 0.105499 | down | 16473.43 | 13689.74 | 15699.89 | 18005.7  | 14116.81 |
| VPA:Contr | 0.123212 | 0.122041 | up   | 1461.808 | 1222.769 | 1495.597 | 1429.53  | 1501.719 |
| VPA:Contr | 0.040307 | 2.52E-10 | down | 184070.9 | 184070.9 | 184070.9 | 184070.9 | 184070.9 |
| VPA:Contr | 0.086032 | 0.084593 | down | 8928.846 | 11420.3  | 10048.61 | 9819.609 | 10608.71 |
| VPA:Contr | 0.062531 | 7.44E-13 | down | 22231.2  | 22231.2  | 22231.2  | 22231.2  | 22231.2  |
| VPA:Contr | 0.165836 | 0.158061 | down | 11724.7  | 8875.601 | 8431.002 | 8998.264 | 7293.591 |
| VPA:Contr | 0.200907 | 5.41E-12 | up   | 10317.22 | 10317.22 | 10317.22 | 10317.22 | 10317.22 |
| VPA:Contr | 0.079886 | 0.065525 | down | 72564.73 | 66618.34 | 69135.89 | 79143.09 | 65017.04 |
| VPA:Contr | 0.053711 | 0.050136 | down | 202881.6 | 194276.3 | 221284.6 | 213986.6 | 192461.5 |
| VPA:Contr | 0.093841 | 0.054099 | up   | 7433.757 | 8127.663 | 8179.311 | 7495.629 | 8225.732 |
| VPA:Contr | 0.059312 | 0.041561 | down | 106470.9 | 101754.6 | 115149.8 | 107219.6 | 102049.3 |
| VPA:Contr | 0.04107  | 0.036084 | down | 9714.668 | 10244.98 | 10613.77 | 10083.48 | 10811.04 |
| VPA:Contr | 0.156172 | 0.132344 | down | 38828.37 | 40877.85 | 51421.87 | 34567.95 | 47599.13 |

|           |          |          |      |          |          |          |          |          |
|-----------|----------|----------|------|----------|----------|----------|----------|----------|
| VPA:Contr | 0.351387 | 0.191787 | down | 9626.351 | 7081.215 | 12912.28 | 8550.149 | 8624.318 |
| VPA:Contr | 0.059345 | 0.046777 | down | 13038.34 | 12135.51 | 13714.73 | 13607.03 | 13864.76 |
| VPA:Contr | 0.130775 | 7.47E-12 | down | 10468.34 | 10468.34 | 10468.34 | 10468.34 | 10468.34 |
| VPA:Contr | 0.232572 | 0.172582 | down | 78634.46 | 66670.37 | 85360.95 | 69392.13 | 47607.2  |
| VPA:Contr | 0.08021  | 1.01E-12 | down | 4417214  | 4417214  | 4417214  | 4417214  | 4417214  |
| VPA:Contr | 0.13301  | 0.119656 | down | 1915392  | 1830858  | 1766938  | 2459747  | 1824014  |
| VPA:Contr | 0.105312 | 0.089734 | down | 5587837  | 5817656  | 5633947  | 7109751  | 5706420  |
| VPA:Contr | 0.090119 | 0.077401 | down | 2334164  | 2727601  | 2404875  | 2833110  | 2807380  |
| VPA:Contr | 0.081464 | 0.081532 | down | 973143   | 821680.8 | 1004339  | 845911.3 | 840665.2 |
| VPA:Contr | 0.048773 | 2.80E-12 | down | 56148.32 | 56148.32 | 56148.32 | 56148.32 | 56148.32 |
| VPA:Contr | 0.074321 | 0.074167 | down | 484481.7 | 427017.9 | 491296.9 | 410892.4 | 419172.8 |
| VPA:Contr | 0.123606 | 0.042529 | down | 25794.63 | 27785.6  | 24065.18 | 26328.05 | 26617.97 |
| VPA:Contr | 0.073419 | 0.070132 | down | 154069.4 | 132370.3 | 140541   | 129884.2 | 125802.7 |
| VPA:Contr | 0.038474 | 1.95E-09 | down | 1684768  | 1684768  | 1684768  | 1684768  | 1684768  |
| VPA:Contr | 0.141979 | 0.028307 | down | 19739.33 | 19037.98 | 18608.01 | 20321.82 | 19107.4  |
| VPA:Contr | 0.045156 | 0.031271 | down | 815929.8 | 818507   | 782884.4 | 856663.1 | 795458.9 |
| VPA:Contr | 0.043101 | 0.038019 | down | 237885.7 | 238562.5 | 228679.9 | 232305.8 | 227675.3 |
| VPA:Contr | 0.04513  | 0.040807 | down | 105890.6 | 93715.19 | 100736.3 | 100749.7 | 100345.6 |
| VPA:Contr | 0.071148 | 0.057102 | down | 25235.08 | 25502.11 | 29195.93 | 24493.76 | 26368.87 |
| VPA:Contr | 0.065021 | 0.060023 | down | 22264.82 | 23839.55 | 23390.74 | 20076.59 | 22136.01 |
| VPA:Contr | 0.159588 | 0.158739 | down | 7560.58  | 7903.226 | 7189.129 | 7707.56  | 10937.61 |
| VPA:Contr | 0.043552 | 0.037854 | down | 57212.25 | 53005.71 | 57072.64 | 51844.65 | 53457.24 |
| VPA:Contr | 0.15818  | 0.143227 | down | 33723.07 | 30780.01 | 38174.58 | 46414.24 | 32818.51 |
| VPA:Contr | 0.185666 | 0.171478 | up   | 948.3768 | 877.8503 | 1367.392 | 843.8499 | 1076.26  |
| VPA:Contr | 0.266966 | 0.222509 | down | 45704.88 | 78002.32 | 46039.81 | 47664.61 | 44803.58 |
| VPA:Contr | 0.067052 | 0.047131 | down | 5178.248 | 4559.304 | 4689.243 | 4683.668 | 4954.095 |
| VPA:Contr | 0.253485 | 0.222127 | down | 102875.7 | 106423.2 | 115248.4 | 98164.51 | 173058.4 |
| VPA:Contr | 0.204488 | 0.188836 | down | 54176.48 | 57545.55 | 59637.19 | 88387.57 | 56299    |
| VPA:Contr | 0.040263 | 0.03897  | down | 37211.16 | 37778.76 | 39652.22 | 35299.44 | 36828.72 |
| VPA:Contr | 0.119713 | 0.10434  | down | 17314.54 | 12818.15 | 17374.69 | 14555.89 | 14805.33 |
| VPA:Contr | 0.099977 | 0.099215 | down | 15151.21 | 15115.67 | 18133.51 | 13216.16 | 15998.31 |
| VPA:Contr | 0.086529 | 0.046861 | down | 8728.947 | 8459.565 | 9335.135 | 8941.398 | 8120.093 |
| VPA:Contr | 0.157445 | 0.036326 | down | 18752.99 | 17914.48 | 20124.82 | 18970.84 | 18319.87 |
| VPA:Contr | 0.034218 | 0.007275 | down | 76255.11 | 75550.3  | 77305.37 | 75762.5  | 76126.28 |
| VPA:Contr | 0.138414 | 0.110423 | down | 55659.28 | 38338.23 | 48996.9  | 50526.57 | 46579.34 |
| VPA:Contr | 0.072976 | 0.043192 | down | 45373.46 | 40394.09 | 40292.11 | 42789.71 | 40673.04 |
| VPA:Contr | 0.035157 | 9.38E-13 | up   | 90473.4  | 90473.4  | 90473.4  | 90473.4  | 90473.4  |
| VPA:Contr | 0.158836 | 0.154823 | down | 25660.12 | 26931.74 | 26669.93 | 25846.21 | 16141.89 |
| VPA:Contr | 0.149841 | 0.14521  | up   | 1112.754 | 1044.428 | 1232.147 | 859.6859 | 1356.775 |
| VPA:Contr | 0.097752 | 0.091574 | down | 13679.55 | 14255.72 | 11381.57 | 14496.81 | 13724.34 |
| VPA:Contr | 0.142807 | 0.134342 | down | 9868.437 | 7199.502 | 10434.5  | 10237.21 | 8501.76  |
| VPA:Contr | 0.079657 | 0.047745 | down | 17408.49 | 16349.41 | 16520.87 | 15198.39 | 17559.25 |
| VPA:Contr | 0.161144 | 0.157516 | down | 7780.537 | 10417.35 | 7400.141 | 9586.454 | 6616.158 |
| VPA:Contr | 0.258587 | 0.237514 | up   | 8366.856 | 6367.934 | 8182.768 | 6831.849 | 12367.94 |
| VPA:Contr | 0.244995 | 0.173484 | up   | 2807.351 | 2606.261 | 4067.925 | 2948.319 | 2484.622 |
| VPA:Contr | 0.039775 | 0.007973 | down | 54456.9  | 53512.18 | 54887.51 | 53934.05 | 53988.68 |
| VPA:Contr | 0.239632 | 3.11E-12 | up   | 9036.252 | 9036.252 | 9036.252 | 9036.252 | 9036.252 |
| VPA:Contr | 0.085258 | 0.0459   | down | 16499.83 | 15909.58 | 16913.82 | 17828.54 | 15421.05 |
| VPA:Contr | 0.079834 | 0.07518  | down | 11909.43 | 10545.61 | 12200.41 | 11553.46 | 12963.56 |
| VPA:Contr | 0.096993 | 0.081269 | up   | 7719.318 | 7303.55  | 7466.21  | 6065.96  | 7913.193 |
| VPA:Contr | 0.247446 | 0.160118 | up   | 3252.593 | 3690.668 | 2548.652 | 2406.227 | 3573.57  |
| VPA:Contr | 0.074123 | 0.061114 | up   | 28624.2  | 32211.86 | 32798.91 | 27898.47 | 31988.48 |
| VPA:Contr | 0.120984 | 0.116224 | up   | 14151.68 | 10987.36 | 12167.69 | 11551.99 | 15082.61 |
| VPA:Contr | 0.165696 | 0.122174 | up   | 2914.406 | 2953.457 | 2374.907 | 3138.567 | 2210.224 |
| VPA:Contr | 0.044395 | 1.12E-12 | down | 74326.06 | 74326.06 | 74326.06 | 74326.06 | 74326.06 |
| VPA:Contr | 0.03984  | 0.039665 | up   | 1213738  | 1276598  | 1176852  | 1322160  | 1249173  |
| VPA:Contr | 0.185035 | 6.14E-10 | up   | 2158.918 | 2158.918 | 2158.918 | 2158.918 | 2158.918 |
| VPA:Contr | 0.099584 | 0.079872 | up   | 8728.017 | 9721.135 | 9898.411 | 11220.17 | 9262.604 |

|           |          |          |      |          |          |          |          |          |
|-----------|----------|----------|------|----------|----------|----------|----------|----------|
| VPA:Contr | 0.06162  | 0.059447 | down | 47351.66 | 45449.89 | 41984.18 | 45183.43 | 41766.52 |
| VPA:Contr | 0.114068 | 0.100784 | up   | 53128.99 | 49753.39 | 43882.18 | 60885.21 | 51857.05 |
| VPA:Contr | 0.080899 | 0.050158 | up   | 4125.733 | 4277.006 | 3867.746 | 3867.207 | 3728.587 |
| VPA:Contr | 0.143851 | 0.135529 | up   | 6035.412 | 5875.968 | 5092.726 | 5245.19  | 7395.154 |
| VPA:Contr | 0.259789 | 0.074278 | down | 2249.832 | 2476.798 | 1947.3   | 2423.733 | 2275.207 |
| VPA:Contr | 0.095995 | 1.08E-10 | up   | 10162.27 | 10162.27 | 10162.27 | 10162.27 | 10162.27 |
| VPA:Contr | 0.238944 | 7.19E-12 | up   | 1480.305 | 1480.305 | 1480.305 | 1480.305 | 1480.305 |
| VPA:Contr | 0.229205 | 0.214408 | up   | 4591.456 | 5398.53  | 3489.413 | 6734.078 | 4143.366 |
| VPA:Contr | 0.238661 | 0.196795 | up   | 7545.903 | 7071.361 | 10830.62 | 5917.067 | 7106.67  |
| VPA:Contr | 0.201742 | 0.181682 | down | 5036.69  | 6657.437 | 5506.135 | 6940.11  | 8330.126 |
| VPA:Contr | 0.28528  | 0.266144 | down | 14732.12 | 8552.893 | 17769.81 | 10632.4  | 9110.016 |
| VPA:Contr | 0.319185 | 0.10542  | up   | 1623.295 | 1892.965 | 1389.835 | 1526.392 | 1847.309 |
| VPA:Contr | 0.132716 | 0.129155 | up   | 9231.602 | 8926.841 | 9574.145 | 6635.791 | 7454.973 |
| VPA:Contr | 0.271241 | 0.242029 | up   | 1561.392 | 2171.713 | 1188.909 | 1231.225 | 1927.526 |
| VPA:Contr | 0.397341 | 1.78E-12 | up   | 4394.273 | 4394.273 | 4394.273 | 4394.273 | 4394.273 |
| VPA:Contr | 0.154755 | 0.141482 | up   | 2483.788 | 3000.422 | 2621.542 | 2443.612 | 3291.999 |
| VPA:Contr | 0.2289   | 0.214694 | up   | 3605.566 | 1805.378 | 3076.516 | 3775.042 | 3038.98  |
| VPA:Contr | 0.148444 | 0.102669 | up   | 4885.011 | 5526.505 | 3950.016 | 5028.514 | 5388.415 |
| VPA:Contr | 0.261138 | 0.082487 | up   | 1537.1   | 1545.495 | 1271.755 | 1689.562 | 1475.026 |
| VPA:Contr | 0.173337 | 0.136354 | up   | 6288.023 | 6253.529 | 5389.228 | 7809.439 | 5343.343 |
| VPA:Contr | 0.201146 | 0.197923 | up   | 2124.193 | 1372.096 | 1703.432 | 1123.364 | 1485.287 |
| VPA:Contr | 0.075903 | 0.049326 | up   | 4522.954 | 5200.481 | 4999.794 | 4615.557 | 5049.949 |
| VPA:Contr | 0.239576 | 7.47E-12 | down | 1149.083 | 1149.083 | 1149.083 | 1149.083 | 1149.083 |
| VPA:Contr | 0.254439 | 0.028866 | down | 1737.245 | 1851.135 | 1681.337 | 1781.127 | 1776.083 |
| VPA:Contr | 0.184737 | 0.170209 | down | 5572.286 | 3602.648 | 4249.259 | 4340.26  | 4763.315 |
| VPA:Contr | 0.176201 | 0.169833 | down | 3813.735 | 2255.489 | 2570.947 | 3288.895 | 2828.357 |
| VPA:Contr | 0.198865 | 0.192757 | up   | 791.0406 | 961.2011 | 773.4612 | 1287.095 | 964.3233 |
| VPA:Contr | 0.110368 | 4.92E-12 | down | 7121.777 | 7121.777 | 7121.777 | 7121.777 | 7121.777 |
| VPA:Contr | 0.085257 | 9.32E-12 | down | 2808.738 | 2808.738 | 2808.738 | 2808.738 | 2808.738 |
| VPA:Contr | 0.234055 | 0.181816 | up   | 5038.28  | 8320.166 | 5913.017 | 5480.149 | 5771.45  |
| VPA:Contr | 0.071627 | 0.066925 | up   | 3758.557 | 4201.458 | 4027.541 | 4136.659 | 4461.215 |
| VPA:Contr | 0.072138 | 0.0642   | down | 8958.93  | 9494.784 | 9972.877 | 9987.357 | 8455.289 |
| VPA:Contr | 0.159079 | 2.47E-12 | down | 2360.827 | 2360.827 | 2360.827 | 2360.827 | 2360.827 |
| VPA:Contr | 0.174366 | 1.11E-12 | down | 3180.203 | 3180.203 | 3180.203 | 3180.203 | 3180.203 |
| VPA:Contr | 0.198529 | 0.050638 | down | 3528.633 | 3108.518 | 3659.396 | 3475.03  | 3317.626 |
| VPA:Contr | 0.18269  | 0.181322 | down | 2946.582 | 1688.582 | 2117.273 | 2059.8   | 2305.512 |

| QC_12    | QC_16    | Control_9 | Control_10 | Control_11 | no_13    | no_14    | VPA_6    | VPA_7    |
|----------|----------|-----------|------------|------------|----------|----------|----------|----------|
| 3821.764 | 3764.151 | 16.6765   | 9.943367   | 695.355    | 759.4344 | 10.73343 | 15691.46 | 16665.24 |
| 2433.185 | 2510.562 | 2971.464  | 2303.091   | 2524.783   | 4526.137 | 1724.658 | 1323.278 | 1233.798 |
| 1876.435 | 1912.324 | 1720.627  | 2191.961   | 1865.946   | 2017.097 | 14.66741 | 3612.12  | 2778.342 |
| 1189.248 | 1194.48  | 6473.009  | 7187.893   | 6518.489   | 2073.734 | 3109.602 | 4138.803 | 2872.781 |
| 3446.332 | 3446.332 | 6108.987  | 7176.287   | 7684.812   | 5572.399 | 5799.87  | 4194.171 | 3920.937 |
| 2140.549 | 1760.276 | 822.549   | 744.0922   | 1178.014   | 860.5965 | 934.4078 | 7027.797 | 6330.3   |
| 1941.707 | 1621.024 | 436.1757  | 315.7821   | 760.987    | 420.4039 | 11.98486 | 7158.15  | 5750.946 |
| 1878.168 | 1878.168 | 2906.046  | 1697.373   | 2582.788   | 3031.023 | 2730.861 | 346.8282 | 428.0561 |
| 1177.292 | 1308.749 | 5245.409  | 2997.608   | 3934.446   | 1960.671 | 2010.79  | 364.3031 | 727.6952 |
| 935.9381 | 1193.17  | 106.4855  | 174.4175   | 98.36347   | 15.34947 | 113.8449 | 4829.593 | 4918.65  |
| 2181.174 | 1749.909 | 2356.986  | 3447.766   | 2458.015   | 3011.624 | 1981.124 | 1867.397 | 1417.159 |
| 2255.736 | 2239.156 | 1272.948  | 1371.112   | 1547.674   | 2449.96  | 1580.597 | 2145.377 | 3095.636 |
| 1723.678 | 2202.893 | 1169.045  | 1208.719   | 1358.49    | 2098.183 | 1926.789 | 2816.701 | 2454.67  |
| 7678.6   | 7665.028 | 4099.521  | 5367.18    | 5587.539   | 6960.725 | 6589.188 | 8143.461 | 8166.72  |
| 1349.411 | 1478.218 | 293.2915  | 312.8258   | 538.3518   | 790.9703 | 1069.586 | 2605.712 | 6474.261 |
| 696.0772 | 696.1485 | 810.1794  | 1065.621   | 406.7695   | 861.71   | 368.8064 | 174.0788 | 155.5495 |
| 2943.672 | 2962.076 | 4885.315  | 7202.9     | 5554.535   | 4359.502 | 2633.095 | 2648.671 | 1620.057 |
| 2477.076 | 2477.076 | 4772.474  | 4840.641   | 5730.979   | 5386.15  | 3609.079 | 2628.148 | 2279.084 |
| 1952.974 | 1924.554 | 2353.054  | 2586.965   | 3312.865   | 2390.566 | 1937.832 | 1806.676 | 1818.786 |
| 2453.364 | 2453.364 | 1943.692  | 2254.444   | 957.3075   | 2086.738 | 1231.171 | 232.5599 | 462.8833 |
| 673.4187 | 1359.552 | 3392.039  | 1436.553   | 1187.133   | 909.1964 | 1265.744 | 253.4283 | 515.7073 |
| 10129.77 | 10129.77 | 4688.598  | 3509.962   | 5699.089   | 8292.421 | 13012.72 | 10537.86 | 11122.97 |
| 2955.282 | 3914.162 | 3812.8    | 3529.045   | 3168.97    | 5809.944 | 1012.785 | 1581.812 | 1466.788 |
| 626.0394 | 969.44   | 2036.08   | 867.1997   | 1151.03    | 1494.685 | 1100.483 | 102.1482 | 186.5268 |
| 51335.27 | 53855.44 | 95565.04  | 57774.21   | 68134.4    | 70190.1  | 48912.42 | 40727.71 | 22419.81 |
| 50145.17 | 48073.69 | 89378.6   | 56633.21   | 68719.04   | 61658.34 | 41974.8  | 33854.22 | 23206.38 |
| 33869.17 | 34140.47 | 46480.06  | 33838.25   | 40165.54   | 47318.75 | 36976.11 | 24555.61 | 21999.01 |
| 9934.948 | 10343.66 | 8538.935  | 10703.71   | 10754.39   | 10446.11 | 7080.95  | 5862.136 | 6923.093 |
| 6240.803 | 6662.292 | 6319.535  | 4752.244   | 16432.64   | 3472.595 | 17787.85 | 780.5563 | 2628.148 |
| 5637.766 | 4273.727 | 7019.611  | 5428.125   | 4666.44    | 5217.777 | 3380.609 | 2931.66  | 3608.562 |
| 6453.846 | 5605.181 | 7239.278  | 9430.91    | 7571.376   | 5708.602 | 5183.991 | 3700.075 | 4378.143 |
| 9685.238 | 8167.411 | 16773.64  | 15068.93   | 14114.71   | 10880.71 | 9987.499 | 10436.46 | 7830.739 |
| 22223.39 | 22058.63 | 42878.55  | 20059.87   | 39736.94   | 31234.01 | 25593.98 | 10290.26 | 6428.444 |
| 21051.77 | 20698.82 | 39659.29  | 17692.5    | 35456.18   | 26870.88 | 26622.01 | 10950.25 | 7382.694 |
| 15278.89 | 15280.6  | 23325.38  | 11798.06   | 25509.68   | 17862.54 | 19638    | 5973.873 | 6229.427 |
| 26323.73 | 28411.38 | 44724.6   | 28832.92   | 50166.09   | 31770    | 36173.1  | 17903.02 | 19645.35 |
| 8034.014 | 6107.811 | 14881.76  | 10553.84   | 8620.676   | 10608.5  | 7636.09  | 6692.231 | 4534.098 |
| 4607.544 | 4410.164 | 5934.929  | 5836.854   | 7402.292   | 6970.609 | 4970.063 | 2551.898 | 3270.344 |
| 1866.596 | 1866.596 | 4784.882  | 2737.578   | 6240.91    | 2573.256 | 3570.916 | 1107.815 | 611.5849 |
| 2323.779 | 2158.216 | 4395.046  | 2744.687   | 2985.787   | 1703.981 | 1727.11  | 2152.29  | 2084.178 |
| 7124.84  | 7124.84  | 1710.237  | 2949.581   | 2706.924   | 4197.772 | 2698.089 | 4578.311 | 5665.23  |
| 16754.4  | 17871.83 | 40307.2   | 60254.03   | 36208.17   | 37019.66 | 31266.7  | 16233.56 | 23269.12 |
| 12523.23 | 14103.43 | 56582.99  | 60146.36   | 34967.13   | 27801.88 | 24118.02 | 17490.25 | 19812.31 |
| 1051.435 | 1119.708 | 609.2127  | 721.6719   | 644.583    | 1571.036 | 1232.361 | 1271.982 | 848.8902 |
| 9006.807 | 9566.658 | 13756.47  | 14977.36   | 18994.34   | 8126.075 | 23394.63 | 10463.51 | 7655.651 |
| 5476.946 | 5349.39  | 8637.528  | 13854.56   | 15177.25   | 7020.375 | 6105.578 | 6100.13  | 6032.519 |
| 74639.74 | 74639.74 | 59758.23  | 59860.1    | 110058.3   | 46840.46 | 50446.06 | 147067.4 | 144519.2 |
| 1241.912 | 1223.822 | 1431.8    | 1398.499   | 1257.114   | 614.1637 | 710.6469 | 1940.133 | 2463.687 |
| 8083.471 | 8139.813 | 9695.05   | 12609.81   | 7790.274   | 10803.5  | 7955.418 | 4867.465 | 6425.141 |
| 3863.394 | 3963.331 | 5578.85   | 5011.292   | 4029.98    | 4960.771 | 2479.11  | 2685.614 | 3125.349 |
| 1910.078 | 1910.078 | 653.5676  | 769.8813   | 413.2454   | 1685.791 | 1721.345 | 1491.622 | 3285.145 |
| 6290.094 | 5778.385 | 8876.153  | 7633.17    | 8325.417   | 6989.753 | 6746.278 | 2932.133 | 3244.85  |
| 13611.7  | 13611.7  | 2260.131  | 1264.27    | 2647.158   | 4905.257 | 7649.051 | 6227.901 | 9627.612 |
| 3716.689 | 3716.689 | 3948.18   | 4435.124   | 3772.329   | 7165.558 | 5195.718 | 2648.98  | 2510.496 |
| 803.8273 | 1513.629 | 2068.527  | 2332.604   | 1697.452   | 1502.429 | 1355.557 | 850.1476 | 1134.908 |
| 1497.355 | 1497.355 | 509.1271  | 423.8136   | 458.8288   | 1047.081 | 1202.336 | 1700.273 | 1094.807 |
| 729.9208 | 719.2284 | 454.7655  | 692.5167   | 441.7284   | 567.5647 | 517.9711 | 1210.599 | 902.8331 |

|          |          |          |          |          |          |          |          |          |
|----------|----------|----------|----------|----------|----------|----------|----------|----------|
| 235082.5 | 265570.4 | 1289420  | 1038017  | 613716.2 | 243853.5 | 277051   | 118817   | 183536.7 |
| 81900.3  | 81900.3  | 310090.5 | 253174   | 158284.2 | 73168.96 | 85757.52 | 35784.6  | 56889.29 |
| 3610.71  | 3616.843 | 5449.135 | 5234.094 | 7238.04  | 4610.489 | 4503.911 | 2989.989 | 1903.483 |
| 1306.497 | 1306.497 | 1739.7   | 2036.32  | 1640.239 | 2055.406 | 2003.928 | 1033.968 | 1068.252 |
| 3143.438 | 3385.636 | 3520.642 | 2823.518 | 3459.292 | 3465.284 | 3624.988 | 2095.812 | 2089.291 |
| 3937.119 | 5153.556 | 2082.317 | 3470.287 | 3064.216 | 2985.49  | 4468.023 | 4965.473 | 4505.513 |
| 1387.789 | 1395.024 | 3539.837 | 1830.392 | 2535.701 | 1450.48  | 3015.845 | 951.8946 | 1175.505 |
| 1467.076 | 1467.076 | 442.4527 | 472.7245 | 180.7612 | 1907.892 | 892.8635 | 2886.588 | 2186.032 |
| 3170.358 | 2831.983 | 2889.065 | 3058.46  | 2471.195 | 3319.16  | 2176.124 | 1536.779 | 1646.603 |
| 1425.647 | 1775.611 | 3447.843 | 3782.993 | 2771.165 | 1908.684 | 588.4692 | 1799.1   | 1804.462 |
| 9402.662 | 9670.682 | 5465.545 | 4864.215 | 4416.551 | 9668.74  | 11605.57 | 7530.327 | 12247.32 |
| 4930.238 | 4929.963 | 2524.076 | 2158.067 | 2984.282 | 6536.536 | 5365.325 | 3672.598 | 5152.521 |
| 2286.667 | 2138.233 | 114.4471 | 56.52258 | 11.5351  | 7.962969 | 12.43496 | 389.9706 | 2554.734 |
| 18650.56 | 17159.41 | 33872.45 | 22911.86 | 20915.02 | 17049.54 | 19363.94 | 14393.45 | 12187.24 |
| 7499.618 | 5549.482 | 10229.38 | 8508.47  | 8355.83  | 7011.807 | 7260.15  | 6017.602 | 3887.131 |
| 1605.708 | 1623.319 | 1625.559 | 932.8755 | 2119.129 | 1324.845 | 3452.707 | 505.7509 | 543.7575 |
| 2809.487 | 2809.487 | 1151.884 | 641.3744 | 1900.802 | 1395.5   | 2705.959 | 3753.705 | 7798.854 |
| 6556.295 | 8177.854 | 9103.903 | 8522.485 | 10224.51 | 9436.134 | 9034.064 | 6781.439 | 5863.752 |
| 1653.653 | 1222.184 | 521.6826 | 657.778  | 769.9766 | 921.478  | 17.62631 | 3468.701 | 4150.497 |
| 2952.555 | 2952.555 | 6204.226 | 5361.697 | 4641.236 | 4454.179 | 4302.078 | 3464.579 | 3684.955 |
| 1385.259 | 1423.831 | 1184.122 | 1078.666 | 869.3545 | 1097.466 | 1509.924 | 1819.562 | 1658.738 |
| 3672.675 | 3672.675 | 479.8009 | 782.6565 | 2150.522 | 1014.029 | 649.7579 | 12018.7  | 11352.91 |
| 3244.186 | 3242.628 | 2136.677 | 3006.037 | 2083.734 | 1876.008 | 1985.529 | 8834.042 | 4804.092 |
| 1826.406 | 1982.962 | 3324.76  | 2939.509 | 2280.309 | 1975.119 | 2618.88  | 1871.884 | 1667.793 |
| 1379.456 | 1404.118 | 3875.29  | 4649.976 | 1793.59  | 2980.346 | 3354.28  | 1135.375 | 580.5434 |
| 2211.429 | 2286.179 | 1176.231 | 1615.695 | 1705.48  | 886.6218 | 1386.119 | 4157.364 | 3588.926 |
| 15276.35 | 15634.64 | 28272.01 | 29058.74 | 34071.28 | 16943.42 | 16262.09 | 18557.41 | 16025.51 |
| 7898.995 | 7898.995 | 4234.38  | 4037.923 | 3829.2   | 8313.737 | 7961.531 | 7265.33  | 6545.395 |
| 1024.466 | 934.8587 | 1244.336 | 1486.734 | 1356.057 | 1621.086 | 1048.708 | 944.9652 | 838.5688 |
| 15272.95 | 11034.76 | 21216.17 | 15047.45 | 22842.67 | 28250.68 | 18357.33 | 6834.741 | 11698.28 |
| 1726.254 | 1719.878 | 779.7416 | 427.3212 | 817.385  | 1018.243 | 2233.494 | 1908.863 | 1547.227 |
| 30132.83 | 29064.83 | 60731.01 | 43874.49 | 34232.35 | 34370.38 | 31219.18 | 9952.05  | 11585.52 |
| 9121.26  | 9510.939 | 16958.24 | 12445.74 | 10769.01 | 11482.79 | 9642.733 | 3239.417 | 4692.941 |
| 2506.522 | 2720.481 | 888.5142 | 1237.915 | 1656.351 | 1684.158 | 1845.793 | 9893.987 | 7832.888 |
| 1315.625 | 1311.626 | 2513.8   | 2739.3   | 1483.083 | 1711.715 | 1729.04  | 637.8256 | 639.6873 |
| 5437.793 | 5071.134 | 3518.361 | 3601.134 | 3811.14  | 3446.254 | 4167.993 | 7815.72  | 7552.232 |
| 20133.65 | 20080.12 | 2172.526 | 2307.179 | 13277.13 | 19045.16 | 9079.818 | 19844.74 | 72642.3  |
| 8074.145 | 8074.145 | 11321.06 | 12428.01 | 7854.926 | 10851.26 | 8386.839 | 7805.877 | 5315.906 |
| 2507.665 | 2533.484 | 3653.968 | 3501.818 | 2564.143 | 2485.789 | 2474.633 | 1955.1   | 2144.145 |
| 16452.84 | 17148.97 | 24368.7  | 16798.78 | 15668.55 | 22059.51 | 14733.76 | 9559.466 | 11068.73 |
| 30912.92 | 31324.66 | 63526.53 | 40282.47 | 40130.34 | 38789.68 | 31727.55 | 11122.23 | 14429.82 |
| 12112.15 | 10856.15 | 19424.03 | 12282.68 | 13244.51 | 13308.44 | 9115.34  | 4095.287 | 5101.048 |
| 1913.575 | 1243.452 | 1678.109 | 1848.962 | 1273.038 | 1890.51  | 911.6205 | 1121.342 | 903.6434 |
| 23024.07 | 23024.07 | 6021.847 | 8195.442 | 14745.38 | 10869.57 | 11927.83 | 17683.4  | 40997.99 |
| 4232.681 | 3198.258 | 4253.153 | 2861.274 | 5242.71  | 2935.299 | 2173.246 | 1001.64  | 1533.095 |
| 1371.9   | 1371.9   | 3760.412 | 5806.285 | 3319.729 | 5172.628 | 3599.288 | 851.193  | 1326.654 |
| 1249725  | 1333895  | 2570958  | 1607711  | 1738402  | 1688761  | 1331863  | 364369.2 | 587033.2 |
| 341692.7 | 341830.7 | 592983.6 | 388572   | 431728.7 | 446039.9 | 332744.1 | 97107.09 | 146785.1 |
| 12707.82 | 12707.82 | 8921.821 | 7776.853 | 7630.844 | 13300.72 | 12155.96 | 11829.59 | 14038.76 |
| 26270.03 | 26270.03 | 870.0033 | 1309.059 | 6607.984 | 9445.991 | 8801.935 | 8566.412 | 51094.82 |
| 70952.63 | 70952.63 | 141371.8 | 87532.61 | 95454.22 | 89122.37 | 63891.64 | 27484.38 | 41701.25 |
| 8761.966 | 7801.873 | 8163.57  | 7719.809 | 8541.77  | 8530.831 | 6158.395 | 5487.6   | 4283.06  |
| 11676.41 | 11195.17 | 16709.97 | 12054.66 | 15179.29 | 11991.71 | 18565.48 | 6054.366 | 3002.207 |
| 6043.406 | 5876.526 | 10458.31 | 6712.466 | 9494.313 | 6203.517 | 7958.237 | 3395.662 | 5717.526 |
| 6339.245 | 6313.772 | 7310.353 | 5523.665 | 5917.25  | 6109.525 | 4834.603 | 2387.76  | 3181.174 |
| 2695.252 | 2655.994 | 881.886  | 1262.362 | 2378.494 | 1242.396 | 1555.865 | 2694.296 | 4852.321 |
| 1443.547 | 1397.117 | 3052.618 | 1732.128 | 2485.143 | 1204.262 | 1551.417 | 1406.235 | 915.7353 |
| 4084.724 | 4084.724 | 1487.803 | 1490.23  | 1975.838 | 2156.253 | 2390.712 | 4394.048 | 3465.678 |



|          |          |          |          |          |          |          |          |          |
|----------|----------|----------|----------|----------|----------|----------|----------|----------|
| 1408.634 | 1408.634 | 5091.16  | 3606.417 | 3854.609 | 2533.436 | 3616.489 | 1666.399 | 2677.412 |
| 1534.018 | 1539.497 | 4131.75  | 2553.143 | 2768.053 | 2431.63  | 2425.395 | 1401.803 | 900.243  |
| 1682.992 | 1682.992 | 1892.82  | 2425.288 | 2085.175 | 2107.374 | 2526.122 | 980.7853 | 586.8346 |
| 883.2689 | 883.2689 | 326.0452 | 430.5075 | 509.2175 | 695.6499 | 828.8439 | 1323.411 | 798.5887 |
| 2343.112 | 2343.112 | 1294.872 | 1850.373 | 1725.925 | 2250.112 | 1768.814 | 697.3527 | 586.7923 |
| 4996.521 | 4996.521 | 2646.878 | 2946.515 | 3348.935 | 3673.595 | 3501.284 | 4752.638 | 6074.958 |
| 868.2093 | 832.4304 | 271.8873 | 312.1181 | 509.4138 | 812.2062 | 951.4483 | 568.532  | 850.0132 |
| 2122.99  | 2261.696 | 2189.134 | 2274.928 | 1810.219 | 1879.842 | 2595.48  | 3682.544 | 3749.821 |
| 145844.9 | 147145.2 | 285168   | 221248.9 | 192546.4 | 182775.5 | 134018.3 | 45393.49 | 62426.98 |
| 45599.49 | 44187.21 | 80130.39 | 60631.1  | 60586.5  | 53516.07 | 41152.29 | 14622.57 | 19267.03 |
| 203916.9 | 204455   | 391777.4 | 235578.4 | 355497.7 | 232815.7 | 328555.4 | 132350.3 | 155477.6 |
| 60909.84 | 62769.7  | 110639   | 73927.24 | 108818   | 71564.19 | 91450    | 44443.48 | 47065.24 |
| 1347.09  | 1375.863 | 1627.967 | 1921.882 | 2618.127 | 1733.365 | 1575.743 | 979.5934 | 850.6678 |
| 11746.32 | 11746.32 | 5345.375 | 7659.377 | 12082.38 | 8401.204 | 14017.52 | 14566.38 | 21841.39 |
| 1146.46  | 1194.32  | 1773.355 | 1640.88  | 2173.819 | 1186.8   | 1816.312 | 786.2368 | 667.8165 |
| 2135.228 | 2135.228 | 1013.354 | 1008.579 | 1214.703 | 874.3302 | 1950.898 | 2108.68  | 1852.416 |
| 4347.037 | 4927.596 | 6903.66  | 5363.608 | 5939.503 | 6562.597 | 2928.755 | 3661.675 | 2293.194 |
| 5872.944 | 5047.878 | 7269.779 | 6679.205 | 6996.548 | 6339.275 | 4702.049 | 3278.175 | 2998.37  |
| 2246.925 | 2318.485 | 3579.955 | 4096.568 | 3505.031 | 2777.41  | 2688.669 | 2506.023 | 1990.803 |
| 22241.8  | 22241.8  | 23467.02 | 47796.57 | 26020.94 | 31034.89 | 28948.88 | 15843.21 | 6037.219 |
| 1752.492 | 1752.944 | 3145.693 | 3962.256 | 3245.684 | 3086.176 | 3745.541 | 1253.955 | 770.7689 |
| 1774.685 | 2472.961 | 956.6474 | 1483.639 | 1914.191 | 2831.473 | 2983.067 | 2845.363 | 3784.897 |
| 1283.071 | 1270.248 | 794.2572 | 849.8635 | 1117.848 | 1364.643 | 1368.946 | 1804.082 | 1630.911 |
| 32552.3  | 32387.12 | 5746.931 | 11724.01 | 25143.16 | 22344.8  | 17645.91 | 30543.71 | 133730.7 |
| 11889.5  | 11516.2  | 19514.85 | 20227    | 13997.18 | 13855.75 | 11853.52 | 9566.901 | 9539.476 |
| 24844.53 | 24844.53 | 49863.25 | 36455.91 | 41812.4  | 26791.41 | 35924.17 | 15698.85 | 16142.3  |
| 9527.001 | 7916.615 | 15962.37 | 12337.37 | 14966.29 | 9338.606 | 11291.31 | 5259.14  | 5156.942 |
| 4561.675 | 3169.283 | 5044.787 | 2850.998 | 5958.333 | 4742.102 | 5580.298 | 2315.8   | 1079.722 |
| 40343.27 | 40343.27 | 71707.64 | 41197.27 | 69340.28 | 40950.26 | 56578.32 | 28976.8  | 9229.348 |
| 13942.16 | 13713.23 | 23158.89 | 15542.89 | 25648.72 | 14456.12 | 18427.69 | 9655.888 | 4613.482 |
| 4020.748 | 5390.077 | 3011.122 | 3311.171 | 3010.973 | 5214.051 | 5741.23  | 5860.135 | 5509.53  |
| 19839.85 | 19723.6  | 33835.05 | 25467.9  | 29533.92 | 21948.54 | 31305.99 | 13384.74 | 13817.44 |
| 7374.153 | 7278.105 | 11811.41 | 9108.981 | 13221.63 | 7984.785 | 8808.095 | 6047.688 | 6971.068 |
| 27788.68 | 27788.68 | 21252.69 | 16860.77 | 30071.52 | 23291.08 | 12360.06 | 31990.37 | 56945.15 |
| 4484.785 | 4484.785 | 3112.778 | 3272.39  | 2865.223 | 3178.064 | 3427.705 | 5100.633 | 6786.819 |
| 2414.929 | 2414.929 | 1767.981 | 1251.518 | 1973.78  | 2882.234 | 3297.189 | 4029.691 | 2413.189 |
| 9557.264 | 7817.529 | 16501.21 | 17936.43 | 17363.63 | 11530.81 | 13060.42 | 11774.3  | 10123.36 |
| 3146.126 | 2952.926 | 4828.641 | 4247.048 | 5359.005 | 4463.592 | 3835.612 | 2761.202 | 1913.074 |
| 2283.678 | 3049.683 | 2171.955 | 2651.687 | 2227.201 | 2500.056 | 2960.412 | 3403.76  | 4008.112 |
| 3279.907 | 3381.137 | 6098.065 | 5318.3   | 5126.62  | 3846.839 | 5194.157 | 2013.408 | 2241.197 |
| 3482.039 | 3002.974 | 3156.249 | 2645.448 | 2342.859 | 3197.733 | 3192.468 | 4731.308 | 5058.811 |
| 10192.06 | 10192.06 | 42543.86 | 53625.81 | 94527.26 | 57395.66 | 37979.89 | 12242.41 | 19375.15 |
| 1784.671 | 1941.919 | 3343.021 | 2446.793 | 2750.592 | 2615.806 | 2202.837 | 1474.296 | 1914.12  |
| 54464.81 | 52119.92 | 38999.86 | 40541.05 | 64188.93 | 33906.1  | 37326.48 | 90730.34 | 73531.6  |
| 23865.58 | 23865.58 | 20883.76 | 21697.15 | 21989.84 | 28047.96 | 18881.88 | 27693.56 | 36472.53 |
| 946.0188 | 920.5849 | 3180.609 | 2417.808 | 1429.627 | 701.91   | 1161.001 | 583.962  | 334.102  |
| 4649.331 | 4480.271 | 1465.544 | 1314.493 | 1872.033 | 5165.886 | 2618.294 | 4792.896 | 4390.168 |
| 6076.996 | 6076.996 | 7338.31  | 5393.633 | 6326.271 | 6526.395 | 6222.025 | 9022.264 | 10734.39 |
| 6430.177 | 6431.766 | 11259.45 | 10509.9  | 11940.65 | 11758.05 | 6946.583 | 5244.734 | 4859.594 |
| 4092.355 | 4163.512 | 7360.012 | 4795.659 | 6307.353 | 5241.129 | 2980.693 | 917.2572 | 1236.274 |
| 1104.88  | 1573.049 | 2044.809 | 2401.289 | 1574.705 | 1504.322 | 1132.754 | 1328.285 | 1078.096 |
| 8517.242 | 8471.363 | 7459.171 | 8903.344 | 9764.845 | 13491.91 | 8461.953 | 3725.353 | 3434.657 |
| 13938.74 | 11629.6  | 14089.75 | 17015.95 | 18044.7  | 18959.26 | 11943.47 | 9768.838 | 6915.026 |
| 1572.975 | 1571.472 | 3157.78  | 2926.908 | 2794.169 | 1644.861 | 2132.578 | 1701.629 | 966.0397 |
| 40364.04 | 41090.95 | 22252.35 | 42735.83 | 56287.66 | 15071.78 | 36256.94 | 88307.31 | 195663.8 |
| 1568.37  | 1123.117 | 446.3162 | 640.4008 | 893.8891 | 781.2978 | 588.3922 | 2847.102 | 2043.034 |
| 17242.27 | 18235.61 | 20784.11 | 13670.93 | 25281.89 | 25022.52 | 19874.52 | 10977.77 | 5748.906 |
| 1868.968 | 1868.968 | 1958.338 | 2507.014 | 2747.788 | 1066.894 | 2312.807 | 1306.143 | 1740.42  |

|          |          |          |          |          |          |          |          |          |
|----------|----------|----------|----------|----------|----------|----------|----------|----------|
| 1984.72  | 1895.394 | 3716.078 | 2858.795 | 2249.218 | 1938.847 | 2058.036 | 1843.866 | 1484.993 |
| 4349.416 | 4132.97  | 2726.112 | 2722.414 | 3633.589 | 4155.008 | 3927.845 | 4333.713 | 4414.258 |
| 749.0695 | 1181.381 | 468.4645 | 369.6961 | 466.6123 | 559.9188 | 627.1082 | 1224.83  | 1298.352 |
| 18136.02 | 18136.02 | 10373.02 | 10281.58 | 14299.61 | 18025.18 | 17987.13 | 21537.45 | 17919.48 |
| 13426.42 | 14028.78 | 10356.6  | 8911.37  | 12146.58 | 8742.182 | 15014.2  | 15871.49 | 25928.03 |
| 13491.35 | 9890.592 | 5703.214 | 6118.463 | 8071.92  | 9729.651 | 8984.108 | 13877.92 | 11436.95 |
| 1040.298 | 844.8289 | 712.6334 | 464.8715 | 568.0183 | 1193.078 | 891.1166 | 1075.777 | 1075.64  |
| 9282.341 | 9298.733 | 4506.224 | 6689.433 | 12019.1  | 4043.134 | 5731.338 | 21686.38 | 31583.84 |
| 2808.942 | 2607.347 | 2649.997 | 2870.878 | 4294.375 | 4842.834 | 2891.627 | 1456.915 | 1172.735 |
| 1038.682 | 1038.682 | 705.9086 | 512.9627 | 653.4171 | 1561.028 | 564.796  | 909.7875 | 1091.117 |
| 14386.65 | 14386.65 | 8504.143 | 7839.647 | 6820.863 | 8147.342 | 10579.58 | 30163.96 | 19805.32 |
| 6309.476 | 5217.2   | 6910.353 | 6066.378 | 9246.012 | 5791.878 | 4968.401 | 4829.735 | 2783.9   |
| 1312.944 | 1307.602 | 588.5456 | 862.1866 | 826.1205 | 1098.292 | 836.9623 | 1111.499 | 1918.988 |
| 1397.417 | 1592.673 | 2015.977 | 2608.259 | 2114.248 | 1308.175 | 1680.264 | 1178.895 | 1310.901 |
| 12236.49 | 11042.09 | 17943.68 | 18520.95 | 11673.02 | 13186.06 | 9841.526 | 7726.212 | 9828.44  |
| 761.0991 | 730.292  | 1635.588 | 1731.428 | 1231.797 | 872.5202 | 982.207  | 545.3028 | 678.1856 |
| 2741.819 | 2753.636 | 1264.918 | 1419.167 | 2806.259 | 2972.6   | 3723.113 | 3505.377 | 4500.933 |
| 12719.58 | 10566.38 | 10344.18 | 16586.09 | 11865.32 | 15894.46 | 8127.376 | 5228.172 | 7518.621 |
| 16237.83 | 16358.19 | 11013.01 | 11896.63 | 11996.26 | 22394.94 | 14970.35 | 18058.52 | 24356.6  |
| 8820.422 | 8857.26  | 4238.545 | 3559.124 | 5749.312 | 5450.767 | 9804.739 | 8913.757 | 11288.32 |
| 11493.02 | 11278.95 | 9408.093 | 10665.04 | 9052.149 | 14078.7  | 9351.511 | 5432.797 | 6026.855 |
| 6805.054 | 4917.604 | 6190.907 | 5764.208 | 5102.221 | 6419.477 | 4354.768 | 3020.021 | 2277.588 |
| 2707.335 | 2707.335 | 2745.831 | 2809.186 | 1991.013 | 2860.484 | 4344.078 | 1177.583 | 1847.774 |
| 2609.022 | 3303.415 | 1784.862 | 198.4572 | 220.0062 | 63293.24 | 230.5455 | 4105.245 | 20359.96 |
| 2160.84  | 2160.84  | 2851.298 | 2149.052 | 2445.409 | 2642.12  | 3448.743 | 1413.35  | 749.059  |
| 4755.314 | 4774.423 | 6927.777 | 6866.195 | 6902.431 | 7804.087 | 3402.466 | 4347.472 | 3886.585 |
| 8361.754 | 8569.644 | 11506.69 | 16550.72 | 10642.38 | 16653.68 | 7537.594 | 8178.948 | 6951.308 |
| 18727.26 | 18800.36 | 21199.78 | 24723.6  | 22701.72 | 28948.73 | 23078.29 | 13680.26 | 16195.17 |
| 2879.235 | 3738.819 | 1167.695 | 719.187  | 1682.631 | 1119.919 | 2244.562 | 7754.764 | 7362.432 |
| 9092.276 | 10648.22 | 11142.05 | 22144.47 | 11636.9  | 12631.21 | 9769.431 | 5580.832 | 7628.881 |
| 14566.89 | 16491.8  | 21957.44 | 19823.2  | 18435.66 | 24242.45 | 26429.85 | 11991.84 | 9006.872 |
| 51829.42 | 51830.05 | 56954.46 | 70125.53 | 56176.45 | 72387.16 | 42162.57 | 23955.84 | 35277.85 |
| 13359.89 | 12730.66 | 8105.674 | 6304.95  | 10943.16 | 11876.11 | 8427.883 | 14536.69 | 26466.94 |
| 148027.8 | 158360.5 | 204010.8 | 221852.9 | 164877.5 | 195076   | 147260   | 81395.33 | 60720.41 |
| 3128.1   | 2989.85  | 1541.612 | 175.601  | 200.6729 | 62375.09 | 237.7036 | 4650.59  | 16105.62 |
| 25712.32 | 25712.32 | 30998.99 | 35658.56 | 38787.05 | 39671.6  | 23655.08 | 15458.2  | 18470.64 |
| 7202.28  | 6761.897 | 4467.775 | 3207.452 | 5331.825 | 4345.678 | 3758.255 | 9099.059 | 10857.55 |
| 67952.62 | 77385.46 | 90850.2  | 99675.56 | 85747.21 | 87573.3  | 72000.77 | 42213.12 | 30500.81 |
| 2252.639 | 2250.04  | 2378.727 | 2393.462 | 1522.235 | 2216.494 | 1846.747 | 1043.05  | 1341.117 |
| 1785.443 | 1803.509 | 3415.129 | 3295.408 | 1810.954 | 1897.207 | 936.9046 | 916.3493 | 1308.607 |
| 167451.8 | 167451.8 | 211133   | 242895.8 | 186024.1 | 240619.6 | 135189.3 | 80179.9  | 103769.5 |
| 73258.05 | 71818.69 | 91548.8  | 109382.4 | 86819.21 | 116846.4 | 61438.91 | 39005.4  | 50425.31 |
| 20431.35 | 20470.36 | 25834.51 | 23270.66 | 22276.46 | 28686.69 | 15352.48 | 8707.986 | 11853.53 |
| 7413.404 | 8934.772 | 4035.169 | 5837.688 | 6202.423 | 316.6401 | 182.0545 | 19155.64 | 8961.729 |
| 27053.76 | 19475.2  | 38838    | 38960.44 | 24863.48 | 34679.36 | 21280.24 | 14712.31 | 9735.586 |
| 11463.14 | 8886.493 | 18308.06 | 15404.63 | 9610.268 | 15545.09 | 11756.25 | 5674.303 | 5889.018 |
| 3700.568 | 2244.631 | 3711.178 | 3533.718 | 3383.132 | 3170.414 | 2713.257 | 2326.261 | 1350.941 |
| 350076.7 | 350737.1 | 505889.6 | 648331.6 | 346905.1 | 511597.4 | 362729.6 | 247581.4 | 197535.9 |
| 6920.734 | 6920.734 | 6264.993 | 5608.895 | 7675.696 | 9012.234 | 9513.604 | 3522.878 | 3769.872 |
| 165768.7 | 156164.5 | 239707.5 | 284425.8 | 159798.8 | 225502.4 | 164006.1 | 123981.9 | 88204.21 |
| 44889.11 | 42699.41 | 62472.06 | 69835.92 | 40590.81 | 61043.16 | 42497.58 | 32244.97 | 23634.56 |
| 276898.1 | 277802.5 | 368819.5 | 451527.2 | 286336   | 383492.6 | 280054.9 | 267012.5 | 155046.4 |
| 1302.811 | 1302.811 | 781.4365 | 427.6591 | 515.8483 | 561.343  | 514.7296 | 4364.955 | 4903.861 |
| 2473.735 | 2361.28  | 941.5701 | 864.9429 | 1565.12  | 936.6156 | 1488.383 | 7966.242 | 7066.945 |
| 3082.531 | 3082.531 | 1418.221 | 1644.897 | 2872.122 | 4495.595 | 3557.456 | 5400.921 | 3992.915 |
| 840.9123 | 842.5293 | 176.2509 | 208.0758 | 298.5828 | 264.1455 | 393.6321 | 2035.142 | 1849.691 |
| 2702.238 | 2702.238 | 2089.859 | 1804.924 | 1485.566 | 1712.668 | 1255.794 | 2986.27  | 3811.974 |
| 16504.13 | 18409.05 | 14404.4  | 9598.475 | 13842.76 | 23993.21 | 9787.483 | 18401.62 | 23103.9  |

|          |          |          |          |          |          |          |          |          |
|----------|----------|----------|----------|----------|----------|----------|----------|----------|
| 919050.3 | 917775.3 | 1243208  | 1100068  | 775718.9 | 1343270  | 688483.3 | 376027.2 | 438791.2 |
| 51590.12 | 38047.43 | 54530.98 | 59576.94 | 46514.02 | 69850.58 | 42826.38 | 24816.37 | 31388.02 |
| 392194.8 | 392194.8 | 490635.3 | 417504.8 | 311816.8 | 540855.9 | 291921.5 | 160136.4 | 184512.9 |
| 4200.501 | 4220.85  | 418.6197 | 986.2347 | 2307.683 | 1759.329 | 799.2731 | 12560.3  | 10677.66 |
| 947.4817 | 1243.797 | 567.8887 | 477.4868 | 911.4289 | 844.7324 | 1143.608 | 1450.209 | 934.3485 |
| 206292.7 | 197978.8 | 335656.9 | 239859.4 | 196107.6 | 321784.9 | 174421.6 | 112421   | 112323.3 |
| 95407.67 | 95547.07 | 144105.4 | 106787.3 | 102300.4 | 142468.9 | 69916.24 | 52520.98 | 66353.14 |
| 326755.2 | 329298.7 | 520334.7 | 413042.9 | 373838.5 | 512651.8 | 322153.2 | 193481.5 | 256645.5 |
| 147340.6 | 144867.2 | 231900.8 | 168152.9 | 174369.6 | 223284.6 | 117173.9 | 95145.41 | 106520.8 |
| 37155.42 | 44862.32 | 52861.5  | 43675.93 | 41465.02 | 54185.64 | 26050.48 | 22185.1  | 27923.62 |
| 8906.985 | 10312.78 | 12844.77 | 18948.38 | 10380.34 | 10394.12 | 7847.253 | 8735.723 | 5998.607 |
| 2844.224 | 3931.037 | 462.565  | 155.1525 | 1191.712 | 1680.766 | 2053.865 | 4818.871 | 18032.38 |
| 12653.62 | 10444.17 | 12413.08 | 12209.6  | 12884.03 | 16865.62 | 11950.02 | 8168.671 | 7974.09  |
| 9211.016 | 9209.581 | 15691.41 | 15605.26 | 22220.33 | 14004.22 | 6943.107 | 10573.99 | 6860.095 |
| 6575.829 | 5771.714 | 5035.85  | 3856.45  | 5134.162 | 1151.663 | 606.5765 | 11197.32 | 8718.584 |
| 25439.05 | 25452.34 | 61604.97 | 54680.97 | 32214.25 | 26803.58 | 34951.89 | 28534.22 | 19077.53 |
| 3274.803 | 2516.168 | 1803.929 | 2088.557 | 1639.472 | 3351.545 | 3526.013 | 3978.537 | 3555.501 |
| 13573.97 | 13580.03 | 12912.81 | 14843.35 | 11803.09 | 16650.25 | 9598.554 | 9793.776 | 8955.315 |
| 44394.3  | 40098.88 | 31029.28 | 45749.79 | 33606.68 | 50499.5  | 31934.63 | 21055.13 | 21833.41 |
| 2138.067 | 2095.957 | 754.1241 | 652.7208 | 1572.946 | 2199.389 | 2887.317 | 2691.797 | 3148.415 |
| 5243.836 | 4642.235 | 4898.217 | 6297.604 | 6506.545 | 7062.159 | 7847.402 | 9821.559 | 9039.292 |
| 962402.1 | 917622.6 | 1424279  | 969298   | 1102428  | 1186863  | 947180.8 | 558980.2 | 689132.3 |
| 421172.5 | 438913.4 | 602458.8 | 448448.6 | 495286   | 551871.5 | 432005.2 | 259934.3 | 315149.9 |
| 5881.223 | 7470.923 | 4013.071 | 5450.082 | 2083.359 | 60.539   | 98.63368 | 18001.1  | 8764.097 |
| 31833.43 | 33011.32 | 32992.49 | 27301.34 | 41417.64 | 34059.3  | 51358.77 | 19935.77 | 17543.3  |
| 28262.58 | 16119.45 | 29986.53 | 25895.18 | 29444.71 | 19438.95 | 19108.58 | 10507.28 | 8152.966 |
| 74160.17 | 74160.17 | 133576.1 | 79021.43 | 77725.29 | 139585.8 | 58709.96 | 37497.29 | 46588.42 |
| 667365   | 648448.9 | 691276.9 | 686737.7 | 943555.6 | 818347.8 | 493220.8 | 428837   | 554965.9 |
| 198332.4 | 197505.2 | 235733.4 | 172914.4 | 184181   | 261146.5 | 139960.5 | 88749.84 | 111515.8 |
| 312197.2 | 305864.7 | 311553.7 | 319388.9 | 448901.1 | 383747.6 | 236292.9 | 202690.8 | 250488.7 |
| 88074.49 | 88450.69 | 122403.9 | 99004.07 | 107026.7 | 144741.6 | 73191.71 | 49139.34 | 60729.99 |
| 36037.36 | 24393.19 | 33795.55 | 42232.14 | 44265.75 | 36303.96 | 19316.96 | 16107.73 | 17499.52 |
| 23531.46 | 27923.82 | 28233.74 | 32455.78 | 31980.79 | 36746.77 | 22497.16 | 23040.71 | 18733.4  |
| 13489.35 | 13409.95 | 19929.73 | 17531.27 | 17934.2  | 39986.54 | 16019.76 | 11414.53 | 8476.417 |
| 9800.028 | 9915.199 | 16905.33 | 11422.23 | 12105.32 | 13339.92 | 20008.29 | 5083.91  | 7121.115 |
| 4291.899 | 4421.025 | 5812.72  | 5691.743 | 6998.259 | 8666.008 | 4143.479 | 1760.802 | 2333.968 |
| 1696.417 | 1367.989 | 186.472  | 382.0593 | 1150.38  | 713.8953 | 382.6806 | 4716.219 | 3837.529 |
| 2553.165 | 2863.045 | 4652.488 | 3458.498 | 3575.165 | 5381.963 | 2541.286 | 1264.341 | 1048.49  |
| 4209.082 | 4894.707 | 7707.87  | 7015.225 | 6206.509 | 5637.646 | 4199.549 | 5213.054 | 3664.898 |
| 12685.43 | 8944.621 | 26891.2  | 23513.35 | 12379.26 | 339.1695 | 441.2028 | 11893.28 | 4372.925 |
| 10334.65 | 9678.35  | 12857.73 | 14624.62 | 17112.2  | 15051.53 | 10448.85 | 9901.904 | 7410.831 |
| 4204.028 | 4730.409 | 2237.766 | 2232.787 | 3907.287 | 1706.082 | 59.869   | 9730.068 | 7505.997 |
| 4408.577 | 4408.577 | 7539.134 | 6421.269 | 6131.553 | 5852.54  | 9995.616 | 1929.875 | 3532.502 |
| 19641    | 20277.43 | 29481.54 | 15882.95 | 34695.61 | 32382.79 | 24391.1  | 8969.095 | 12670.9  |
| 371127.6 | 371113.1 | 489915.3 | 296075.8 | 445700.3 | 456968.2 | 365894.5 | 201626   | 278460.4 |
| 17352.67 | 14572.78 | 18801.55 | 17790.76 | 25286.98 | 25233.01 | 11900.55 | 13608.67 | 12236.08 |
| 1116.358 | 1600.607 | 667.344  | 720.8079 | 1159.874 | 2099.04  | 1365.292 | 1873.575 | 1538.081 |
| 184070.9 | 184070.9 | 244453.6 | 146367.3 | 204841.9 | 217713.3 | 174221.5 | 97898.45 | 131125.7 |
| 9232.82  | 10497.75 | 12037.28 | 12372.05 | 15268.41 | 16751.97 | 8167.582 | 6785.382 | 5769.818 |
| 22231.2  | 22231.2  | 30851.9  | 30312.77 | 28620.8  | 25269.71 | 22495.56 | 22846.29 | 18590.15 |
| 10632.4  | 8891.349 | 12776.62 | 13820.73 | 16324.63 | 14165.72 | 7093.338 | 5934.245 | 6918.535 |
| 10317.22 | 10317.22 | 4024.586 | 4800.121 | 4093.449 | 5960.133 | 7913.206 | 6951.272 | 6854.248 |
| 69347.74 | 71249.41 | 102504.8 | 78859.18 | 104783.9 | 101245.1 | 67100.68 | 48427.02 | 48217.57 |
| 207817.9 | 203014.6 | 368407.8 | 347349.9 | 271914   | 315167.8 | 200916.7 | 165450   | 184370.5 |
| 7260.96  | 8178.648 | 761.0563 | 969.9512 | 3858.152 | 4706.002 | 3828.374 | 6254.128 | 18582.94 |
| 106725.9 | 106591   | 205333.8 | 174268.5 | 141757.5 | 179127.3 | 95633.28 | 85499.51 | 98607.43 |
| 10007.45 | 10247.69 | 27610.1  | 45722.67 | 56819.32 | 16615.71 | 17855.09 | 20355.75 | 13248.54 |
| 43473.98 | 40509.29 | 73944.23 | 48763.68 | 56341.63 | 43698.08 | 39177.93 | 39129.53 | 29143.59 |

|          |          |          |          |          |          |          |          |          |
|----------|----------|----------|----------|----------|----------|----------|----------|----------|
| 9160.207 | 9207.906 | 20275.56 | 18088.4  | 12666.11 | 12336.07 | 6220.821 | 8782.049 | 10192.07 |
| 12702.26 | 13273.69 | 20410.57 | 14803.95 | 10123.04 | 7515.451 | 22200.3  | 3109.053 | 6647.752 |
| 10468.34 | 10468.34 | 13097.14 | 16300.69 | 20626.23 | 12583.4  | 13305.16 | 4803.65  | 6942.633 |
| 78684.78 | 69121.56 | 112913.1 | 93640.66 | 69794.24 | 75450.35 | 158704   | 27479.28 | 42365.76 |
| 4417214  | 4417214  | 6601394  | 3523584  | 5488792  | 5110414  | 4932970  | 2267909  | 1424631  |
| 1932296  | 1913086  | 3249186  | 1690273  | 2704061  | 2498075  | 2291474  | 982365.6 | 759928.3 |
| 5729407  | 5930357  | 7001112  | 5962726  | 8804345  | 6663894  | 6919480  | 4227600  | 4745009  |
| 2459059  | 2599139  | 3007998  | 2590863  | 3775835  | 2845201  | 3041931  | 1918046  | 2074992  |
| 958942.3 | 880769   | 1293063  | 1320929  | 1017369  | 1317750  | 908228.6 | 680598.9 | 591282.6 |
| 56148.32 | 56148.32 | 90396.68 | 82862.46 | 72400.86 | 77574.42 | 52367.87 | 54117.28 | 49431.32 |
| 476912.7 | 441962   | 640503   | 623998.4 | 498497   | 639197.9 | 471642.3 | 341175.9 | 306644.4 |
| 26078.82 | 26072.2  | 39965.22 | 38886.32 | 30965.8  | 26802.38 | 30894.28 | 23910.32 | 18957.12 |
| 144973.3 | 136980.5 | 186350   | 192590.9 | 148259.8 | 189003.8 | 144563   | 109018.5 | 104878.8 |
| 1684768  | 1684768  | 2317679  | 2002034  | 1954778  | 2066250  | 1556604  | 1596005  | 1201064  |
| 19359.93 | 19349.6  | 28679.16 | 29319.21 | 23956.43 | 29617.96 | 22210.03 | 19520.08 | 11827.21 |
| 837612   | 799936.6 | 1163698  | 1015432  | 973439   | 984217.4 | 757481.5 | 800956.9 | 607864.4 |
| 251240.9 | 225359.7 | 333111.6 | 327827.4 | 294716.6 | 293767.6 | 204768.1 | 247316.1 | 192968.6 |
| 104874.1 | 97889.19 | 120752.4 | 72168.77 | 131446.6 | 142869.1 | 81891.36 | 57231.56 | 44514.46 |
| 26020.94 | 26037.44 | 26573.44 | 23628.51 | 26626.47 | 27770.22 | 24626.18 | 16879.25 | 17176.58 |
| 23854.2  | 21830.87 | 32941.88 | 19866.61 | 31294.7  | 23870.45 | 21917.91 | 13740.64 | 14988.73 |
| 7349.523 | 8079.548 | 16246.96 | 12775.86 | 9920.475 | 16759.11 | 7082.026 | 3206.198 | 4849.271 |
| 55798.83 | 54569.16 | 88726.54 | 78969.44 | 55376.46 | 77342.38 | 53261.09 | 37708.12 | 46659.45 |
| 34111.61 | 35831.08 | 52215.76 | 45157.94 | 35579.41 | 50316.77 | 47970.47 | 22662.05 | 26234.57 |
| 991.3103 | 994.1729 | 31.59456 | 34.60161 | 21.93471 | 23.47909 | 37.12896 | 3110.357 | 5976.283 |
| 52871.52 | 52955.84 | 98238.57 | 55242.55 | 96434.54 | 79549.83 | 59362.79 | 51501.15 | 25131.32 |
| 4617.612 | 4955.377 | 7731.257 | 2800.384 | 7145.178 | 5728.047 | 12077.71 | 1517.819 | 2245.506 |
| 103985.4 | 113037.2 | 95354.25 | 145320.9 | 133485.7 | 103950.6 | 121707.5 | 70367.83 | 50130.35 |
| 58379.55 | 61233.18 | 58256.15 | 86902.49 | 70291.17 | 60345.7  | 70677.16 | 39950.89 | 28842.63 |
| 38954.7  | 36721.32 | 62982.88 | 24350.37 | 42611.38 | 43477.76 | 79177.74 | 10068.23 | 20577.85 |
| 15110.61 | 15662.95 | 23873.59 | 16705.82 | 20125.24 | 19819.55 | 16913.06 | 14429.65 | 13414.37 |
| 14456.36 | 16101    | 28506.53 | 22816.06 | 17249.11 | 11783.93 | 23243.61 | 15115.04 | 8772.13  |
| 9087.544 | 8565.989 | 12615.67 | 8630.667 | 11186.91 | 8790.906 | 8357.862 | 7932.066 | 6338.413 |
| 18787.29 | 18790.54 | 18766.04 | 15815.97 | 18573.66 | 21575.84 | 15082.01 | 10159.17 | 11082.64 |
| 76190.75 | 76205.98 | 87827.81 | 98157.15 | 84658.52 | 94244.26 | 74799.24 | 63231.08 | 51979.83 |
| 50440.68 | 46466.6  | 64041.61 | 37609.79 | 52959.93 | 64470.43 | 44410.21 | 27472.92 | 19273.26 |
| 42729.96 | 42032.58 | 47818.14 | 55584.22 | 44095.88 | 56618.71 | 40584.46 | 33434.32 | 30134.04 |
| 90473.4  | 90473.4  | 74778.07 | 60908.98 | 73371.99 | 68397.88 | 95844.19 | 86812.34 | 131354.1 |
| 26412.12 | 24735.48 | 22220.06 | 32432.15 | 28731.15 | 33648.31 | 21421.43 | 17419.6  | 20870.25 |
| 1004.643 | 1150.651 | 44.19793 | 51.64239 | 20.56515 | 21.03809 | 21.95334 | 2765.087 | 5665.088 |
| 15035.53 | 12571.57 | 23015.26 | 18942.58 | 15552.88 | 20726.47 | 12320.37 | 10947.04 | 13842.9  |
| 10361.82 | 8468.033 | 14636.89 | 11637.96 | 11359.21 | 13036.55 | 10614.55 | 7460.425 | 7820.789 |
| 16292.24 | 16856.8  | 18050    | 21266.12 | 18550.05 | 27323.15 | 15729.05 | 13374.31 | 7625.926 |
| 7930.079 | 8789.617 | 9171.472 | 6909.386 | 10160.45 | 13508.58 | 5063.762 | 3847.511 | 3788.243 |
| 7880.036 | 7685.353 | 3367.179 | 2700.486 | 4947.592 | 5790.025 | 10050.68 | 7167.986 | 9316.744 |
| 2983.601 | 2943.413 | 874.5887 | 214.7382 | 22.27787 | 66.89397 | 499.6479 | 18924.77 | 16761.77 |
| 54192.74 | 54182.42 | 86939.03 | 44575.87 | 93430.7  | 106914.4 | 59068.26 | 19204.4  | 24345.65 |
| 9036.252 | 9036.252 | 5198.933 | 4158.493 | 5386.258 | 3975.153 | 4972.065 | 8556.215 | 12058.63 |
| 16526.11 | 16510.44 | 33212.56 | 17580.41 | 26972.52 | 28740.99 | 12821.64 | 8952.044 | 8562.322 |
| 10636.81 | 12234.98 | 18805.17 | 13624.77 | 14036.81 | 18547.72 | 10200.11 | 7001.133 | 5232.801 |
| 7417.806 | 7271.619 | 3019.566 | 2799.582 | 5925.535 | 7682.943 | 7088.886 | 9552.908 | 13491.67 |
| 3387.202 | 2933.194 | 1503.34  | 164.1286 | 178.6559 | 49553    | 177.2288 | 3865.23  | 17354.15 |
| 31162.4  | 30087.41 | 8815.441 | 12508.58 | 25387.1  | 23075.64 | 24640.32 | 26542.11 | 60898.94 |
| 13431.74 | 12056.32 | 3810.631 | 6809.829 | 7591.076 | 16143.56 | 16783.55 | 17526.81 | 19109.13 |
| 2895.759 | 2712.437 | 2113.817 | 914.882  | 1889.049 | 4528.588 | 1937.331 | 3674.658 | 5380.296 |
| 74326.06 | 74326.06 | 122604   | 57156.78 | 112220.7 | 153040.6 | 75068.35 | 24529.07 | 27544.15 |
| 1203143  | 1261414  | 651996.5 | 810147.3 | 1314187  | 791838.4 | 789566.8 | 1414624  | 2550174  |
| 2158.918 | 2158.918 | 1028.061 | 1106.736 | 1291.611 | 1507.271 | 1885.699 | 1891.446 | 1562.332 |
| 9362.941 | 9696.083 | 3620.446 | 4629.753 | 5675.357 | 10507.66 | 10269.12 | 10704.48 | 14584.99 |

|          |          |          |          |          |          |          |          |          |
|----------|----------|----------|----------|----------|----------|----------|----------|----------|
| 48674.28 | 42987.25 | 73841.31 | 37518.2  | 70606.39 | 92786.1  | 40621.73 | 15429.92 | 18832.03 |
| 48575.85 | 52679.08 | 26832.17 | 31310.9  | 52227.83 | 30330.71 | 34904.04 | 59108.96 | 90132.26 |
| 4197.184 | 3958.182 | 1884.548 | 209.4648 | 231.8141 | 66560.78 | 242.3701 | 4649.716 | 18536.64 |
| 5252.462 | 6097.358 | 2077.058 | 2839.107 | 2969.473 | 6063.141 | 5117.871 | 4122.386 | 4121.71  |
| 2271.812 | 2263.506 | 3972.121 | 3227.52  | 3038.816 | 4297.207 | 2804.047 | 1467.838 | 2069.351 |
| 10162.27 | 10162.27 | 5399.672 | 5925.378 | 8083.656 | 9786.99  | 10425.27 | 10508.56 | 12004.27 |
| 1480.305 | 1480.305 | 215.0393 | 185.7672 | 295.3385 | 333.4443 | 648.2744 | 927.8721 | 5455.146 |
| 4472.004 | 4912.383 | 1577.334 | 1250.788 | 3022.374 | 2013.348 | 5049.413 | 4068.751 | 5894.042 |
| 7740.295 | 7644.588 | 4687.271 | 4381.681 | 6408.414 | 5623.791 | 6445.779 | 7649.972 | 8716.525 |
| 5302.099 | 6423.256 | 11381.35 | 5023.297 | 7235.716 | 10272.27 | 6013.357 | 2501.897 | 3336.41  |
| 11903.33 | 12445.17 | 20884    | 10798.29 | 27266.71 | 21153.07 | 10611.49 | 5427.541 | 5866.626 |
| 1638.019 | 1641.787 | 445.35   | 379.8969 | 959.5875 | 927.8235 | 772.3428 | 5488.761 | 6061.109 |
| 9362.369 | 8291.464 | 2157.033 | 1764.594 | 5415.873 | 6965.23  | 7535.696 | 6561.561 | 14069.02 |
| 2004.42  | 1379.486 | 253.6921 | 252.9572 | 576.5644 | 937.5572 | 1302.13  | 1803.041 | 7489.555 |
| 4394.273 | 4394.273 | 2377.072 | 2470.992 | 4284.616 | 7044.265 | 3737.425 | 7278.376 | 7374.523 |
| 2213.738 | 3015.991 | 1774.05  | 202.8813 | 231.3258 | 70400.31 | 263.7473 | 2782.257 | 19869.11 |
| 3254.802 | 2697.016 | 1652.942 | 187.5092 | 213.3092 | 65730.92 | 248.9814 | 2567.04  | 15689.17 |
| 4881.629 | 4895.751 | 4256.573 | 2900.953 | 5787.248 | 723.0423 | 18473.07 | 7459.02  | 9395.845 |
| 1500.362 | 1494.692 | 274.9098 | 293.8694 | 481.7815 | 463.9696 | 537.0763 | 4242.446 | 4604.283 |
| 6731.413 | 5899.68  | 2206.49  | 1857.365 | 4719.102 | 5027.888 | 5429.081 | 6742.87  | 8916.334 |
| 1710.79  | 1565.105 | 139.1422 | 281.8471 | 158.6465 | 330.7068 | 501.2948 | 4652.926 | 5544.211 |
| 4831.209 | 4844.273 | 4128.927 | 3323.71  | 4943.762 | 2856.992 | 4501.838 | 5983.282 | 8945.441 |
| 1149.083 | 1149.083 | 2458.373 | 2274.865 | 3301.283 | 5109.793 | 2139.731 | 404.5192 | 706.9678 |
| 1764.937 | 1763.231 | 1618.194 | 1489.415 | 1398.012 | 2815.162 | 1732.849 | 436.6595 | 738.3191 |
| 3548.36  | 5174.514 | 5459.513 | 6296.374 | 6571.701 | 5414.393 | 3856.261 | 3972.772 | 2435.083 |
| 3023.401 | 2895.827 | 3958.878 | 4390.809 | 3276.19  | 4099.193 | 2610.302 | 2214.093 | 2101.976 |
| 790.4464 | 970.0111 | 98.09178 | 203.7149 | 117.1185 | 89.89943 | 120.2685 | 4886.324 | 3698.692 |
| 7121.777 | 7121.777 | 9660.207 | 9344.963 | 9802.859 | 10554.91 | 8289.28  | 5522.757 | 6024.676 |
| 2808.738 | 2808.738 | 3094.569 | 3663.507 | 2284.658 | 3666.393 | 2672.233 | 2051.579 | 1504.268 |
| 5370.151 | 6521.181 | 39.18537 | 84.43257 | 10.05087 | 538.3629 | 9.895275 | 43280.95 | 28382.85 |
| 3690.79  | 4239.36  | 45.73615 | 95.59361 | 74.33027 | 757.8977 | 746.762  | 18575.93 | 15491.2  |
| 8851.712 | 9731.044 | 14570.2  | 10380.7  | 10953.18 | 8926.74  | 10087.09 | 7087.142 | 4833.264 |
| 2360.827 | 2360.827 | 2620.501 | 3857.236 | 3454.84  | 4409.979 | 2707.838 | 1554.476 | 1221.565 |
| 3180.203 | 3180.203 | 6594.042 | 6714.509 | 8131.595 | 5653.389 | 3612.935 | 1471.573 | 2773.504 |
| 3413.583 | 3415.945 | 7389.379 | 9482.168 | 5001.238 | 6134.527 | 3003.869 | 3968.495 | 3320.57  |
| 2564.375 | 2049.382 | 3751.18  | 3389.715 | 2074.307 | 3160.933 | 2113.512 | 1201.175 | 720.9281 |

| VPA_8    | no_15    | IsAnnotate | NumberM | RankMS2ic | RankMS2li | RankMS2h | RankMS2k | RankMS2p |
|----------|----------|------------|---------|-----------|-----------|----------|----------|----------|
| 815.876  | 11.45197 | 0          | 0       | -         | -         | -        | -        | -        |
| 1360.628 | 2912.413 | 0          | 0       | -         | -         | -        | -        | -        |
| 3829.101 | 1786.17  | 1          | 0       | -         | -         | -        | -        | -        |
| 3843.932 | 1256.334 | 1          | 0       | -         | -         | -        | -        | -        |
| 5627.456 | 3795.558 | 0          | 0       | -         | -         | -        | -        | -        |
| 2038.219 | 1145.227 | 0          | 0       | -         | -         | -        | -        | -        |
| 1753.443 | 570.6018 | 0          | 0       | -         | -         | -        | -        | -        |
| 821.5001 | 3733.728 | 0          | 0       | -         | -         | -        | -        | -        |
| 1118.299 | 4366.797 | 0          | 0       | -         | -         | -        | -        | -        |
| 629.7229 | 93.12334 | 1          | 0       | -         | -         | -        | -        | -        |
| 1434.202 | 2380.318 | 0          | 0       | -         | -         | -        | -        | -        |
| 2734.496 | 993.1383 | 1          | 0       | -         | -         | -        | -        | -        |
| 2692.828 | 1791.157 | 0          | 0       | -         | -         | -        | -        | -        |
| 8003.232 | 7181.32  | 1          | 0       | -         | -         | -        | -        | -        |
| 1227.954 | 1217.818 | 0          | 0       | -         | -         | -        | -        | -        |
| 103.7459 | 587.0502 | 0          | 0       | -         | -         | -        | -        | -        |
| 2803.044 | 3640.087 | 0          | 0       | -         | -         | -        | -        | -        |
| 2027.652 | 3059.074 | 0          | 0       | -         | -         | -        | -        | -        |
| 1355.417 | 2025.429 | 0          | 0       | -         | -         | -        | -        | -        |
| 431.0315 | 4004.91  | 0          | 0       | -         | -         | -        | -        | -        |
| 579.2825 | 3531.185 | 0          | 0       | -         | -         | -        | -        | -        |
| 7464.008 | 20369.8  | 0          | 0       | -         | -         | -        | -        | -        |
| 2038.615 | 8481.837 | 0          | 0       | -         | -         | -        | -        | -        |
| 158.8326 | 1981.95  | 0          | 0       | -         | -         | -        | -        | -        |
| 25827.42 | 72426.99 | 1          | 0       | -         | -         | -        | -        | -        |
| 27132.96 | 71832.25 | 0          | 0       | -         | -         | -        | -        | -        |
| 21843.74 | 41831.54 | 0          | 0       | -         | -         | -        | -        | -        |
| 5702.011 | 12575.06 | 0          | 0       | -         | -         | -        | -        | -        |
| 1925.199 | 15897.13 | 0          | 0       | -         | -         | -        | -        | -        |
| 3944.834 | 5082.063 | 0          | 0       | -         | -         | -        | -        | -        |
| 3962.075 | 6783.727 | 0          | 0       | -         | -         | -        | -        | -        |
| 7395.876 | 14419.08 | 0          | 0       | -         | -         | -        | -        | -        |
| 6433.214 | 26476.21 | 0          | 0       | -         | -         | -        | -        | -        |
| 8068.055 | 23504.86 | 0          | 0       | -         | -         | -        | -        | -        |
| 6226.037 | 20675.71 | 0          | 0       | -         | -         | -        | -        | -        |
| 19637.88 | 24191.53 | 0          | 0       | -         | -         | -        | -        | -        |
| 4455.623 | 13322.7  | 1          | 0       | -         | -         | -        | -        | -        |
| 4263.137 | 5060.611 | 0          | 0       | -         | -         | -        | -        | -        |
| 1794.027 | 1483.875 | 0          | 0       | -         | -         | -        | -        | -        |
| 1392.042 | 4787.997 | 0          | 0       | -         | -         | -        | -        | -        |
| 3700.905 | 5231.695 | 0          | 0       | -         | -         | -        | -        | -        |
| 20896.99 | 29058.59 | 1          | 0       | -         | -         | -        | -        | -        |
| 28153.42 | 31566.01 | 1          | 0       | -         | -         | -        | -        | -        |
| 994.3652 | 1175.062 | 0          | 0       | -         | -         | -        | -        | -        |
| 10955.16 | 10571.48 | 1          | 0       | -         | -         | -        | -        | -        |
| 5107.767 | 6274.267 | 1          | 0       | -         | -         | -        | -        | -        |
| 248360.1 | 13857.4  | 1          | 0       | -         | -         | -        | -        | -        |
| 2780.115 | 617.705  | 0          | 0       | -         | -         | -        | -        | -        |
| 5990.417 | 11219.58 | 0          | 0       | -         | -         | -        | -        | -        |
| 3041.891 | 4538.896 | 0          | 0       | -         | -         | -        | -        | -        |
| 3405.928 | 1853.336 | 1          | 0       | -         | -         | -        | -        | -        |
| 5274.546 | 7932.738 | 1          | 0       | -         | -         | -        | -        | -        |
| 4284.085 | 14646.27 | 0          | 0       | -         | -         | -        | -        | -        |
| 2382.776 | 4633.304 | 1          | 0       | -         | -         | -        | -        | -        |
| 1375.343 | 1805.701 | 0          | 0       | -         | -         | -        | -        | -        |
| 2200.515 | 707.4364 | 0          | 0       | -         | -         | -        | -        | -        |
| 1220.173 | 627.2621 | 0          | 0       | -         | -         | -        | -        | -        |

|          |          |   |   |                                   |   |   |   |           |
|----------|----------|---|---|-----------------------------------|---|---|---|-----------|
| 81064.6  | 288745   | 1 | 0 | -                                 | - | - | - | -         |
| 21865.76 | 90859.79 | 0 | 0 | -                                 | - | - | - | -         |
| 2382.859 | 4953.891 | 1 | 0 | -                                 | - | - | - | -         |
| 1126.112 | 1430.343 | 0 | 0 | -                                 | - | - | - | -         |
| 2103.372 | 3355.672 | 1 | 0 | -                                 | - | - | - | -         |
| 5734.586 | 2792.14  | 0 | 0 | -                                 | - | - | - | -         |
| 776.5753 | 1938.03  | 1 | 0 | -                                 | - | - | - | -         |
| 3021.478 | 1174.642 | 1 | 0 | -                                 | - | - | - | -         |
| 2211.943 | 3393.756 | 0 | 0 | -                                 | - | - | - | -         |
| 2618.962 | 1587.081 | 0 | 0 | -                                 | - | - | - | -         |
| 10265.19 | 8061.409 | 0 | 0 | -                                 | - | - | - | -         |
| 5987.331 | 3691.047 | 0 | 0 | -                                 | - | - | - | -         |
| 11910    | 3.98966  | 0 | 0 | -                                 | - | - | - | -         |
| 12532.2  | 29700.68 | 1 | 0 | -                                 | - | - | - | -         |
| 5629.622 | 10588.53 | 1 | 0 | -                                 | - | - | - | -         |
| 667.8162 | 3123.459 | 1 | 0 | -                                 | - | - | - | -         |
| 6536.822 | 1504.084 | 0 | 0 | -                                 | - | - | - | -         |
| 4831.837 | 10847.59 | 1 | 1 | Carnitine(1-                      | - | - | - | -         |
| 3242.226 | 1004.552 | 0 | 0 | -                                 | - | - | - | -         |
| 2580.623 | 5999.49  | 1 | 0 | -                                 | - | - | - | -         |
| 1387.745 | 1019.872 | 0 | 0 | -                                 | - | - | - | -         |
| 3554.886 | 1102.57  | 0 | 0 | -                                 | - | - | - | -         |
| 5969.054 | 1372.864 | 0 | 0 | -                                 | - | - | - | -         |
| 1920.981 | 2586.336 | 0 | 0 | -                                 | - | - | - | -         |
| 794.3309 | 2002.32  | 0 | 0 | -                                 | - | - | - | -         |
| 2105.145 | 2155.764 | 0 | 0 | -                                 | - | - | - | -         |
| 15942.58 | 16291.76 | 1 | 0 | -                                 | - | - | - | -         |
| 5089.604 | 6680.28  | 0 | 0 | -                                 | - | - | - | -         |
| 911.1667 | 988.9497 | 0 | 0 | -                                 | - | - | - | -         |
| 10366.74 | 37603.16 | 1 | 1 | PC(O-16:1 LMGP0107-               | - | - | - | 10814552  |
| 1444.082 | 633.7156 | 1 | 0 | -                                 | - | - | - | -         |
| 23452.08 | 63237.62 | 1 | 0 | -                                 | - | - | - | -         |
| 7492.994 | 15852.35 | 0 | 0 | -                                 | - | - | - | -         |
| 2534.19  | 1149.734 | 0 | 0 | -                                 | - | - | - | -         |
| 1096.004 | 1314.257 | 1 | 0 | -                                 | - | - | - | -         |
| 4980.536 | 5242.366 | 1 | 0 | -                                 | - | - | - | -         |
| 31296.85 | 11900.36 | 0 | 0 | -                                 | - | - | - | -         |
| 5437.911 | 13005.34 | 0 | 0 | -                                 | - | - | - | -         |
| 1641.625 | 3162.768 | 0 | 0 | -                                 | - | - | - | -         |
| 10787.28 | 36379.26 | 1 | 1 | PC(O-16:1 LMGP0107-               | - | - | - | 10814552  |
| 24124.71 | 80830.99 | 1 | 1 | PC(O-16:1 LMGP0107-               | - | - | - | 10814552  |
| 9087.404 | 25058.93 | 1 | 0 | -                                 | - | - | - | -         |
| 871.5883 | 1400.682 | 0 | 0 | -                                 | - | - | - | -         |
| 42743.5  | 18507.49 | 1 | 0 | -                                 | - | - | - | -         |
| 2454.852 | 8176.022 | 0 | 0 | -                                 | - | - | - | -         |
| 1914.684 | 3860.323 | 0 | 0 | -                                 | - | - | - | -         |
| 968651.1 | 3462420  | 1 | 1 | PC(18:2/0:1 LMGP0105 HMDB103-     | - | - | - | 11005824  |
| 243712.6 | 905098   | 1 | 0 | -                                 | - | - | - | -         |
| 13029.03 | 16724.49 | 1 | 2 | PC(P-16:0, LMGP0103 -; HMDB02 -;- | - | - | - | 24779387; |
| 35176.31 | 7223.341 | 0 | 0 | -                                 | - | - | - | -         |
| 54966.15 | 174678.2 | 1 | 1 | PC(P-16:0, LMGP0103 -             | - | - | - | 24779387  |
| 5052.82  | 8789.767 | 0 | 0 | -                                 | - | - | - | -         |
| 7170.897 | 20143.49 | 1 | 1 | PE(22:6/0:(-                      | - | - | - | -         |
| 4389.359 | 8064.494 | 1 | 0 | -                                 | - | - | - | -         |
| 2786.809 | 11571.68 | 1 | 0 | -                                 | - | - | - | -         |
| 5113.789 | 378.8238 | 0 | 0 | -                                 | - | - | - | -         |
| 1181.658 | 2660.403 | 0 | 0 | -                                 | - | - | - | -         |
| 3544.64  | 2901.947 | 0 | 0 | -                                 | - | - | - | -         |

|          |          |   |   |             |          |         |        |          |           |           |
|----------|----------|---|---|-------------|----------|---------|--------|----------|-----------|-----------|
| 2325.404 | 1772.333 | 0 | 0 | -           | -        | -       | -      | -        |           |           |
| 1648.063 | 2262.607 | 1 | 0 | -           | -        | -       | -      | -        |           |           |
| 987.655  | 1703.578 | 1 | 0 | -           | -        | -       | -      | -        |           |           |
| 656.2098 | 1024.984 | 0 | 0 | -           | -        | -       | -      | -        |           |           |
| 976.6452 | 2353.543 | 0 | 0 | -           | -        | -       | -      | -        |           |           |
| 4248.331 | 4152.922 | 0 | 0 | -           | -        | -       | -      | -        |           |           |
| 906.1486 | 585.6293 | 0 | 0 | -           | -        | -       | -      | -        |           |           |
| 2804.951 | 3405.763 | 1 | 0 | -           | -        | -       | -      | -        |           |           |
| 112632.1 | 282047.4 | 1 | 1 | PC(18:2/0:1 | LMGP0105 | HMDB103 | -      | 11005824 |           |           |
| 32942.7  | 83548.41 | 1 | 0 | -           | -        | -       | -      | -        |           |           |
| 138755.7 | 269810.7 | 1 | 3 | PC(P-16:0:1 | LMGP0103 | -;      | HMDB10 | -;       | -;        | 24779387; |
| 51791.98 | 89982.16 | 0 | 0 | -           | -        | -       | -      | -        |           |           |
| 1206.17  | 2357.606 | 1 | 0 | -           | -        | -       | -      | -        |           |           |
| 22321.61 | 3823.015 | 0 | 0 | -           | -        | -       | -      | -        |           |           |
| 832.6423 | 1677.987 | 1 | 0 | -           | -        | -       | -      | -        |           |           |
| 1647.947 | 3563.392 | 1 | 3 | PC(P-18:0:1 | LMGP0103 | -;      | -;     | -;       | 24779389; |           |
| 3082.931 | 4824.284 | 0 | 0 | -           | -        | -       | -      | -        |           |           |
| 4440.746 | 7733.283 | 1 | 0 | -           | -        | -       | -      | -        |           |           |
| 2838.924 | 2519.503 | 0 | 0 | -           | -        | -       | -      | -        |           |           |
| 10096.31 | 27720.88 | 0 | 0 | -           | -        | -       | -      | -        |           |           |
| 1720.02  | 2291.2   | 1 | 0 | -           | -        | -       | -      | -        |           |           |
| 2852.963 | 990.7257 | 0 | 0 | -           | -        | -       | -      | -        |           |           |
| 1381.334 | 1111.861 | 0 | 0 | -           | -        | -       | -      | -        |           |           |
| 92065.19 | 6459.068 | 0 | 0 | -           | -        | -       | -      | -        |           |           |
| 9538.218 | 11430.5  | 0 | 0 | -           | -        | -       | -      | -        |           |           |
| 16200.12 | 28989.66 | 1 | 1 | PC(20:4/0:1 | LMGP0105 | HMDB103 | -      | 24779476 |           |           |
| 5585.138 | 10353.53 | 0 | 0 | -           | -        | -       | -      | -        |           |           |
| 2013.154 | 4245.541 | 1 | 0 | -           | -        | -       | -      | -        |           |           |
| 19672.79 | 64779.95 | 1 | 1 | PC(22:6/0:1 | LMGP0105 | HMDB104 | -      | 10415542 |           |           |
| 8005.452 | 21991.76 | 1 | 0 | -           | -        | -       | -      | -        |           |           |
| 4660.497 | 4383.04  | 0 | 0 | -           | -        | -       | -      | -        |           |           |
| 20086.1  | 28697.4  | 1 | 1 | PC(22:5/0:1 | -        | -       | -      | -        |           |           |
| 8565.8   | 10409.54 | 0 | 0 | -           | -        | -       | -      | -        |           |           |
| 63879.19 | 18766.38 | 1 | 0 | -           | -        | -       | -      | -        |           |           |
| 5345.466 | 3930.659 | 0 | 0 | -           | -        | -       | -      | -        |           |           |
| 2727.918 | 3109.684 | 0 | 0 | -           | -        | -       | -      | -        |           |           |
| 11559.27 | 12493.01 | 0 | 0 | -           | -        | -       | -      | -        |           |           |
| 2853.57  | 4333.732 | 1 | 0 | -           | -        | -       | -      | -        |           |           |
| 4583.417 | 867.5572 | 1 | 0 | -           | -        | -       | -      | -        |           |           |
| 3479.794 | 4805.105 | 1 | 0 | -           | -        | -       | -      | -        |           |           |
| 3427.38  | 1777.234 | 1 | 0 | -           | -        | -       | -      | -        |           |           |
| 27337.87 | 13461.14 | 1 | 0 | -           | -        | -       | -      | -        |           |           |
| 1456.954 | 2391.144 | 0 | 0 | -           | -        | -       | -      | -        |           |           |
| 150938   | 11375.42 | 1 | 0 | -           | -        | -       | -      | -        |           |           |
| 35146.86 | 25426.25 | 1 | 0 | -           | -        | -       | -      | -        |           |           |
| 386.067  | 1434.113 | 0 | 0 | -           | -        | -       | -      | -        |           |           |
| 4408.705 | 2703.935 | 0 | 0 | -           | -        | -       | -      | -        |           |           |
| 15651.59 | 6407.782 | 1 | 0 | -           | -        | -       | -      | -        |           |           |
| 4361.051 | 9540.616 | 0 | 0 | -           | -        | -       | -      | -        |           |           |
| 3001.963 | 13035.46 | 0 | 0 | -           | -        | -       | -      | -        |           |           |
| 1206.488 | 1305.569 | 0 | 0 | -           | -        | -       | -      | -        |           |           |
| 3154.672 | 14759.31 | 1 | 0 | -           | -        | -       | -      | -        |           |           |
| 7392.83  | 24654.35 | 0 | 0 | -           | -        | -       | -      | -        |           |           |
| 1511.241 | 2118.802 | 0 | 0 | -           | -        | -       | -      | -        |           |           |
| 408487.8 | 18000.14 | 0 | 0 | -           | -        | -       | -      | -        |           |           |
| 1392.144 | 1194.307 | 0 | 0 | -           | -        | -       | -      | -        |           |           |
| 9308.624 | 40466.5  | 1 | 0 | -           | -        | -       | -      | -        |           |           |
| 1648.142 | 1968.293 | 1 | 0 | -           | -        | -       | -      | -        |           |           |



|          |          |   |    |                             |                 |                 |            |   |
|----------|----------|---|----|-----------------------------|-----------------|-----------------|------------|---|
| 1777.683 | 1923.206 | 1 | 0  | -                           | -               | -               | -          | - |
| 5105.953 | 4690.268 | 0 | 0  | -                           | -               | -               | -          | - |
| 1722.605 | 423.1475 | 1 | 0  | -                           | -               | -               | -          | - |
| 16246.17 | 20499.13 | 0 | 0  | -                           | -               | -               | -          | - |
| 17418.1  | 8343.657 | 0 | 0  | -                           | -               | -               | -          | - |
| 8977.924 | 6681.014 | 0 | 0  | -                           | -               | -               | -          | - |
| 863.0022 | 1006.111 | 1 | 0  | -                           | -               | -               | -          | - |
| 19237.73 | 3279.263 | 0 | 0  | -                           | -               | -               | -          | - |
| 1403.598 | 4182.519 | 0 | 0  | -                           | -               | -               | -          | - |
| 1106.835 | 1403.171 | 0 | 0  | -                           | -               | -               | -          | - |
| 16067.13 | 19691.31 | 0 | 0  | -                           | -               | -               | -          | - |
| 3925.083 | 4269.912 | 0 | 0  | -                           | -               | -               | -          | - |
| 1389.649 | 1533.021 | 0 | 0  | -                           | -               | -               | -          | - |
| 1442.876 | 1676.121 | 0 | 0  | -                           | -               | -               | -          | - |
| 8468.134 | 16778.91 | 0 | 0  | -                           | -               | -               | -          | - |
| 1009.008 | 1389.118 | 1 | 0  | -                           | -               | -               | -          | - |
| 5285.13  | 1854.823 | 0 | 0  | -                           | -               | -               | -          | - |
| 5272.542 | 16225.97 | 1 | 0  | -                           | -               | -               | -          | - |
| 19373.54 | 15956.24 | 1 | 0  | -                           | -               | -               | -          | - |
| 7679.541 | 6570.052 | 0 | 0  | -                           | -               | -               | -          | - |
| 6742.911 | 19175.42 | 1 | 0  | -                           | -               | -               | -          | - |
| 3317.448 | 7112.02  | 0 | 0  | -                           | -               | -               | -          | - |
| 1271.113 | 3734.222 | 1 | 0  | -                           | -               | -               | -          | - |
| 74126.84 | 62846.92 | 0 | 0  | -                           | -               | -               | -          | - |
| 809.0812 | 2809.711 | 0 | 0  | -                           | -               | -               | -          | - |
| 4503.306 | 6742.184 | 0 | 0  | -                           | -               | -               | -          | - |
| 5592.521 | 13872.02 | 0 | 0  | -                           | -               | -               | -          | - |
| 14755.33 | 22133.34 | 1 | 1  | SM(d17:1/                   | -               | -               | -          | - |
| 2911.522 | 1660.884 | 0 | 0  | -                           | -               | -               | -          | - |
| 5413.501 | 12321.29 | 0 | 0  | -                           | -               | -               | -          | - |
| 8030.367 | 25232.88 | 1 | 0  | -                           | -               | -               | -          | - |
| 36270.15 | 75490.03 | 1 | 3  | PC(P-20:0/LMGP0103          | -;-;-           | -;-;-           | 52923976;! |   |
| 19524.81 | 6531.464 | 1 | 10 | PE(18:1/16 LMGP0201HMDB090! | -;-;-;-;-;-;-;- | -;-;-;-;-;-;-;- | 9546802;9! |   |
| 66479.19 | 267495.2 | 1 | 3  | PC(P-20:0/LMGP0103          | -;-;-           | -;-;-           | 52923976;! |   |
| 62917.23 | 224.1412 | 0 | 0  | -                           | -               | -               | -          | - |
| 20229.8  | 43924.47 | 1 | 0  | -                           | -               | -               | -          | - |
| 7380.648 | 2456.047 | 0 | 0  | -                           | -               | -               | -          | - |
| 34435.23 | 136523.9 | 1 | 0  | -                           | -               | -               | -          | - |
| 752.3666 | 3269.292 | 0 | 0  | -                           | -               | -               | -          | - |
| 1239.012 | 2265.006 | 0 | 0  | -                           | -               | -               | -          | - |
| 114025   | 259056.3 | 1 | 0  | -                           | -               | -               | -          | - |
| 49940.47 | 118293.2 | 1 | 0  | -                           | -               | -               | -          | - |
| 13052.29 | 31941.45 | 0 | 0  | -                           | -               | -               | -          | - |
| 10286.74 | 190.5577 | 0 | 0  | -                           | -               | -               | -          | - |
| 11650.55 | 43677.7  | 1 | 0  | -                           | -               | -               | -          | - |
| 5801.241 | 18574.58 | 0 | 0  | -                           | -               | -               | -          | - |
| 1721.217 | 2568.402 | 1 | 0  | -                           | -               | -               | -          | - |
| 217834.8 | 398954   | 1 | 1  | SM(d18:1/                   | -               | -               | -          | - |
| 2712.474 | 10678.92 | 0 | 0  | -                           | -               | -               | -          | - |
| 105678.2 | 192989.3 | 0 | 0  | -                           | -               | -               | -          | - |
| 26043.86 | 45893.09 | 1 | 4  | SM(d18:1/ LMSP0301          | -;-;-;-         | -;-;-;-         | 6453725;-; |   |
| 154203.1 | 339854.6 | 1 | 0  | -                           | -               | -               | -          | - |
| 2756.511 | 563.5321 | 1 | 0  | -                           | -               | -               | -          | - |
| 4728.95  | 780.5129 | 1 | 0  | -                           | -               | -               | -          | - |
| 3905.192 | 6213.954 | 0 | 0  | -                           | -               | -               | -          | - |
| 535.1177 | 162.2811 | 0 | 0  | -                           | -               | -               | -          | - |
| 4393.134 | 1687.35  | 0 | 0  | -                           | -               | -               | -          | - |
| 24203.22 | 8363.544 | 1 | 0  | -                           | -               | -               | -          | - |





|          |          |   |     |   |   |   |   |
|----------|----------|---|-----|---|---|---|---|
| 25828.19 | 65999.8  | 1 | 0 - | - | - | - | - |
| 96366.28 | 11753.04 | 0 | 0 - | - | - | - | - |
| 78077.74 | 66250.32 | 0 | 0 - | - | - | - | - |
| 4550.535 | 5940.832 | 1 | 0 - | - | - | - | - |
| 1884.779 | 2584.1   | 1 | 0 - | - | - | - | - |
| 16812.12 | 6026.917 | 1 | 0 - | - | - | - | - |
| 2100.846 | 171.1403 | 0 | 0 - | - | - | - | - |
| 5317.727 | 3131.205 | 0 | 0 - | - | - | - | - |
| 8019.356 | 2978.8   | 1 | 0 - | - | - | - | - |
| 3934.791 | 12110.1  | 1 | 0 - | - | - | - | - |
| 8339.557 | 23145.85 | 1 | 0 - | - | - | - | - |
| 2199.757 | 2035.516 | 0 | 0 - | - | - | - | - |
| 8725.156 | 11893.41 | 0 | 0 - | - | - | - | - |
| 3300.36  | 2241.853 | 0 | 0 - | - | - | - | - |
| 5678.154 | 5334.949 | 1 | 0 - | - | - | - | - |
| 71634.59 | 73948.49 | 0 | 0 - | - | - | - | - |
| 67678.81 | 71106.27 | 0 | 0 - | - | - | - | - |
| 9712.408 | 14648.01 | 1 | 0 - | - | - | - | - |
| 1247.303 | 943.8098 | 0 | 0 - | - | - | - | - |
| 11203.87 | 4611.734 | 1 | 0 - | - | - | - | - |
| 1109.253 | 591.0704 | 1 | 0 - | - | - | - | - |
| 6708.017 | 1980.702 | 0 | 0 - | - | - | - | - |
| 621.7287 | 2248.915 | 0 | 0 - | - | - | - | - |
| 396.4087 | 4110.22  | 0 | 0 - | - | - | - | - |
| 2794.134 | 6851.292 | 0 | 0 - | - | - | - | - |
| 2504.736 | 4509.833 | 1 | 0 - | - | - | - | - |
| 604.0736 | 24.27005 | 1 | 0 - | - | - | - | - |
| 5751.975 | 12871.15 | 1 | 0 - | - | - | - | - |
| 1763.216 | 5680.336 | 1 | 0 - | - | - | - | - |
| 646.4985 | 97.46564 | 0 | 0 - | - | - | - | - |
| 948.3826 | 687.0029 | 0 | 0 - | - | - | - | - |
| 4594.776 | 10704.35 | 0 | 0 - | - | - | - | - |
| 1468.572 | 4008.363 | 0 | 0 - | - | - | - | - |
| 2807.717 | 3938.313 | 1 | 0 - | - | - | - | - |
| 2713.631 | 8583.206 | 1 | 0 - | - | - | - | - |
| 526.0254 | 3865.799 | 0 | 0 - | - | - | - | - |



|             |              |                |          |              |           |                |
|-------------|--------------|----------------|----------|--------------|-----------|----------------|
| -           | -            | 7 (5Z,7E)-9,1  | LMST0302 | Fatty amid   | level 3   | Multiple class |
| -           | -            | 0              | -        | -            | -         | -              |
| -           | -            | 2 24-nor-3a    | LMST0406 | Bile acids   | α level 2 | Unique class   |
| -           | -            | 0              | -        | -            | -         | -              |
| -           | -            | 4 (E,E)-3,7,1: | LMFA0701 | Fatty ester: | level 3   | Multiple class |
| -           | -            | 0              | -        | -            | -         | -              |
| -           | -            | 11 -;(2R,5E,12 | LMPR0105 | Bile acids   | α level 3 | Multiple class |
| -           | -            | 2 2-hydroxy    | LMFA0500 | Fatty Acids  | ε level 3 | Multiple class |
| -           | -            | 0              | -        | -            | -         | -              |
| -           | -            | 0              | -        | -            | -         | -              |
| -           | -            | 0              | -        | -            | -         | -              |
| -           | -            | 0              | -        | -            | -         | -              |
| -           | -            | 0              | -        | -            | -         | -              |
| -           | -            | 9 O-9Z,12Z-    | LMFA0707 | Bile acids   | α level 3 | Multiple class |
| -           | -            | 1 2R,5,7,8-te  | LMPR0202 | Quinones     | δ level 1 | Unique lipid   |
| -           | -            | 4 (4S,5aS,5b   | LMPR0105 | Isoprenoid   | level 3   | Multiple class |
| -           | -            | 0              | -        | -            | -         | -              |
| 1 unique li | Fatty ester: | 0              | -        | -            | -         | -              |
| -           | -            | 0              | -        | -            | -         | -              |
| -           | -            | 4 25-methyl    | LMFA0102 | Fatty Acids  | ε level 2 | Unique class   |
| -           | -            | 0              | -        | -            | -         | -              |
| -           | -            | 0              | -        | -            | -         | -              |
| -           | -            | 0              | -        | -            | -         | -              |
| -           | -            | 0              | -        | -            | -         | -              |
| -           | -            | 0              | -        | -            | -         | -              |
| -           | -            | 0              | -        | -            | -         | -              |
| -           | -            | 10 3-oxo-18-   | LMST0116 | Fatty ester: | level 3   | Multiple class |
| -           | -            | 0              | -        | -            | -         | -              |
| -           | -            | 0              | -        | -            | -         | -              |
| 1 unique li | Glyceroph    | 5 1-(11Z-he    | LMGP0106 | Glyceroph    | level 2   | Unique class   |
| -           | -            | 2 2beta,5alp   | LMST0103 | Bile acids   | α level 3 | Multiple class |
| -           | -            | 13 1-(4Z,7Z,1  | LMGP1005 | Flavonoids   | level 3   | Multiple class |
| -           | -            | 0              | -        | -            | -         | -              |
| -           | -            | 0              | -        | -            | -         | -              |
| -           | -            | 6 -;5,7,4'-Tri | LMPK0400 | Flavonoids   | level 3   | Multiple class |
| -           | -            | 1 1-O-alpha    | LMFA1301 | Fatty acyl   | ζ level 1 | Unique lipid   |
| -           | -            | 0              | -        | -            | -         | -              |
| -           | -            | 0              | -        | -            | -         | -              |
| -           | -            | 0              | -        | -            | -         | -              |
| 1 unique li | Glyceroph    | 6 1-(11Z-he    | LMGP0106 | Fatty Acids  | ε level 3 | Multiple class |
| 1 unique li | Glyceroph    | 6 1-(11Z-he    | LMGP0106 | Fatty Acids  | ε level 3 | Multiple class |
| -           | -            | 5 (5Z,7E)-(1   | LMST0302 | Bile acids   | α level 3 | Multiple class |
| -           | -            | 0              | -        | -            | -         | -              |
| -           | -            | 1 11R-(pent:   | LMFA0701 | Fatty ester: | level 1   | Unique lipid   |
| -           | -            | 0              | -        | -            | -         | -              |
| -           | -            | 0              | -        | -            | -         | -              |
| 1 unique li | Glyceroph    | 2 1-(2E,4E-c   | LMGP0105 | Glyceroph    | level 2   | Unique class   |
| -           | -            | 6 -;(22R)-1a   | LMST0101 | Isoprenoid   | level 3   | Multiple class |
| 2 unique li | Glyceroph    | 10 (2-{{(2R)-2 | LMGP0105 | Glyceroph    | level 2   | Unique class   |
| -           | -            | 0              | -        | -            | -         | -              |
| 1 unique li | Glyceroph    | 0              | -        | -            | -         | -              |
| -           | -            | 0              | -        | -            | -         | -              |
| 1 unique li | Glyceroph    | 8 (2-aminoe    | LMGP0205 | Glyceroph    | level 2   | Unique class   |
| -           | -            | 3 (2-{{(2R)-2  | LMGP0105 | Glyceroph    | level 2   | Unique class   |
| -           | -            | 4 1-nonadec    | LMGP0405 | Glyceroph    | level 3   | Multiple class |
| -           | -            | 0              | -        | -            | -         | -              |
| -           | -            | 0              | -        | -            | -         | -              |
| -           | -            | 0              | -        | -            | -         | -              |

|             |            |    |                      |              |         |                |
|-------------|------------|----|----------------------|--------------|---------|----------------|
| -           | -          | 0  | -                    | -            | -       | -              |
| -           | -          | 1  | 11R-(pent: LMFA0701  | Fatty ester: | level 1 | Unique lipid   |
| -           | -          | 3  | 19Z,22Z,25 LMFA0103  | Fatty Acids: | level 3 | Multiple class |
| -           | -          | 0  | -                    | -            | -       | -              |
| -           | -          | 0  | -                    | -            | -       | -              |
| -           | -          | 0  | -                    | -            | -       | -              |
| -           | -          | 0  | -                    | -            | -       | -              |
| -           | -          | 1  | 1-(1Z-eicc LMGP0407  | Glyceroph:   | level 1 | Unique lipid   |
| 1 unique li | Glyceroph: | 3  | 1-(5Z,8Z,1 LMGP0105  | Glyceroph:   | level 2 | Unique class   |
| -           | -          | 5  | -(22R)-1a LMST0101   | Glyceroph:   | level 3 | Multiple class |
| 2 unique li | Glyceroph: | 13 | (2-{{(2R)-2 LMGP0105 | Glyceroph:   | level 2 | Unique class   |
| -           | -          | 0  | -                    | -            | -       | -              |
| -           | -          | 2  | (2-aminoe LMGP0205   | Glyceroph:   | level 2 | Unique class   |
| -           | -          | 0  | -                    | -            | -       | -              |
| -           | -          | 1  | 1-(4Z,7Z,1 LMGP0105  | Glyceroph:   | level 1 | Unique lipid   |
| 2 unique li | Glyceroph: | 1  | (5Z,7E)-(15 LMST0302 | Secosteroid: | level 1 | Unique lipid   |
| -           | -          | 0  | -                    | -            | -       | -              |
| -           | -          | 1  | 1-(11Z,14 LMGP0405   | Glyceroph:   | level 1 | Unique lipid   |
| -           | -          | 0  | -                    | -            | -       | -              |
| -           | -          | 0  | -                    | -            | -       | -              |
| -           | -          | 3  | N-(dodeca LMSP0205   | Ceramides    | level 2 | Unique class   |
| -           | -          | 0  | -                    | -            | -       | -              |
| -           | -          | 0  | -                    | -            | -       | -              |
| -           | -          | 0  | -                    | -            | -       | -              |
| -           | -          | 0  | -                    | -            | -       | -              |
| 1 unique li | Glyceroph: | 3  | (2-{{(2R)-2 LMGP0105 | Glyceroph:   | level 2 | Unique class   |
| -           | -          | 0  | -                    | -            | -       | -              |
| -           | -          | 1  | 1-(4Z,7Z,1 LMGP0105  | Glyceroph:   | level 1 | Unique lipid   |
| 1 unique li | Glyceroph: | 3  | 1-(4Z,7Z,1 LMGP0105  | Glyceroph:   | level 2 | Unique class   |
| -           | -          | 4  | (-)-6beta,1 LMPR0106 | Isoprenoid   | level 3 | Multiple class |
| -           | -          | 0  | -                    | -            | -       | -              |
| 1 unique li | Glyceroph: | 4  | (2-{{(2R)-3 LMGP0105 | Glyceroph:   | level 2 | Unique class   |
| -           | -          | 0  | -                    | -            | -       | -              |
| -           | -          | 1  | (3S,4R,9R,1 LMFA0500 | Fatty alcoh: | level 1 | Unique lipid   |
| -           | -          | 0  | -                    | -            | -       | -              |
| -           | -          | 0  | -                    | -            | -       | -              |
| -           | -          | 0  | -                    | -            | -       | -              |
| -           | -          | 4  | N-(2-hydr LMSP0201   | Ceramides    | level 2 | Unique class   |
| -           | -          | 2  | -;1-trideca LMPR0400 | Diradylglyc: | level 3 | Multiple class |
| -           | -          | 2  | (2-{{(2R)-3 LMGP0105 | Glyceroph:   | level 2 | Unique class   |
| -           | -          | 3  | -;-;- LMPK1211       | Flavonoids   | level 2 | Unique class   |
| -           | -          | 1  | 2S,4S,6S,8 LMFA0102  | Fatty Acids: | level 1 | Unique lipid   |
| -           | -          | 0  | -                    | -            | -       | -              |
| -           | -          | 2  | 1-(14-met LMGL0207   | Diradylglyc: | level 2 | Unique class   |
| -           | -          | 3  | docosanyl LMFA0701   | Fatty ester: | level 2 | Unique class   |
| -           | -          | 0  | -                    | -            | -       | -              |
| -           | -          | 0  | -                    | -            | -       | -              |
| -           | -          | 4  | 13,17-Dim LMFA1100   | Hydrocarb    | level 2 | Unique class   |
| -           | -          | 0  | -                    | -            | -       | -              |
| -           | -          | 0  | -                    | -            | -       | -              |
| -           | -          | 0  | -                    | -            | -       | -              |
| -           | -          | 2  | N-(docosa LMSP0000   | Other Sphi   | level 3 | Multiple class |
| -           | -          | 0  | -                    | -            | -       | -              |
| -           | -          | 0  | -                    | -            | -       | -              |
| -           | -          | 0  | -                    | -            | -       | -              |
| -           | -          | 0  | -                    | -            | -       | -              |
| -           | -          | 1  | 1-(8-[3]-la LMGL0203 | Diradylglyc: | level 1 | Unique lipid   |
| -           | -          | 1  | N-(hexade LMSP0501   | Neutral gly  | level 1 | Unique lipid   |

|             |           |                                                           |
|-------------|-----------|-----------------------------------------------------------|
| -           | -         | 1 (22R)-2bet LMST0101 Sterols [ST level 1 Unique lipid    |
| -           | -         | 0 - - - -                                                 |
| -           | -         | 2 -;1,3-dioct LMGL0000 Diradylglyc level 3 Multiple class |
| -           | -         | 0 - - - -                                                 |
| -           | -         | 0 - - - -                                                 |
| -           | -         | 0 - - - -                                                 |
| -           | -         | 3 1-(9Z,12Z, LMGL0201 Diradylglyc level 2 Unique class    |
| -           | -         | 0 - - - -                                                 |
| -           | -         | 0 - - - -                                                 |
| -           | -         | 0 - - - -                                                 |
| -           | -         | 0 - - - -                                                 |
| -           | -         | 0 - - - -                                                 |
| -           | -         | 0 - - - -                                                 |
| -           | -         | 0 - - - -                                                 |
| -           | -         | 0 - - - -                                                 |
| -           | -         | 6 1-dodecar LMGP0401 Glyceroph level 2 Unique class       |
| -           | -         | 0 - - - -                                                 |
| -           | -         | 12 1-tetradec LMGP0102 Glyceroph level 3 Multiple class   |
| -           | -         | 6 1-(8Z,11Z, LMGL0201 Diradylglyc level 2 Unique class    |
| -           | -         | 0 - - - -                                                 |
| -           | -         | 13 1-(1Z-hex LMGP1003 Diradylglyc level 3 Multiple class  |
| -           | -         | 0 - - - -                                                 |
| -           | -         | 3 1-eicosyl- LMGP1002 Glyceroph level 2 Unique class      |
| -           | -         | 0 - - - -                                                 |
| -           | -         | 0 - - - -                                                 |
| -           | -         | 0 - - - -                                                 |
| -           | -         | 0 - - - -                                                 |
| 1 unique li | Phosphos  | 7 N-(15Z-te LMSP0302 Phosphos level 3 Multiple class      |
| -           | -         | 0 - - - -                                                 |
| -           | -         | 0 - - - -                                                 |
| -           | -         | 4 N-(2-hydr LMSP0302 Glyceroph level 3 Multiple class     |
| 2 unique li | Glyceroph | 17 1-tetradec LMGP0102 Glyceroph level 3 Multiple class   |
| 2 unique li | Glyceroph | 46 1-hexadec LMGP0101 Glyceroph level 3 Multiple class    |
| 2 unique li | Glyceroph | 17 1-tetradec LMGP0102 Glyceroph level 3 Multiple class   |
| -           | -         | 0 - - - -                                                 |
| -           | -         | 2 2-methyl- LMPR0201 Quinones level 3 Multiple class      |
| -           | -         | 0 - - - -                                                 |
| -           | -         | 2 2-methyl- LMPR0201 Quinones level 3 Multiple class      |
| -           | -         | 0 - - - -                                                 |
| -           | -         | 0 - - - -                                                 |
| -           | -         | 13 1-tetradec LMGP0102 Glyceroph level 3 Multiple class   |
| -           | -         | 2 cholest-5- LMST0102 Fatty acyl level 3 Multiple class   |
| -           | -         | 0 - - - -                                                 |
| -           | -         | 0 - - - -                                                 |
| -           | -         | 3 N-(9Z-oct LMSP0301 Phosphos level 3 Multiple class      |
| -           | -         | 0 - - - -                                                 |
| -           | -         | 1 1-(13Z,16z LMGP0605 Glyceroph level 1 Unique lipid      |
| 1 unique li | Phosphos  | 10 N-(9Z-oct LMSP0301 Phosphos level 3 Multiple class     |
| -           | -         | 0 - - - -                                                 |
| -           | -         | 0 - - - -                                                 |
| 2 unique li | Phosphos  | 6 1-eicosyl- LMGP1002 Diradylglyc level 3 Multiple class  |
| -           | -         | 1 1,2-didode LMGL0301 Triradylgly level 1 Unique lipid    |
| -           | -         | 23 1-tridecan LMGP0101 Glyceroph level 3 Multiple class   |
| -           | -         | 6 1,2-didode LMGL0301 Triradylgly level 2 Unique class    |
| -           | -         | 0 - - - -                                                 |
| -           | -         | 0 - - - -                                                 |
| -           | -         | 0 - - - -                                                 |
| -           | -         | 25 1-octadec LMGP1002 Glyceroph level 3 Multiple class    |



|                       |                                                            |
|-----------------------|------------------------------------------------------------|
| 1 unique li Glyceroph | 18 1-(9Z,12Z- LMGP0109 Glyceroph level 3 Multiple class    |
| 1 unique li Glyceroph | 18 1-(9Z,12Z- LMGP0109 Glyceroph level 3 Multiple class    |
| - -                   | 1 N-(2R-hyc LMSP0501 Neutral gly level 1 Unique lipid      |
| - -                   | 20 1,2-didodec LMGL0301 Neutral gly level 3 Multiple class |
| - -                   | 0 - - - -                                                  |
| 2 unique li Glyceroph | 17 1-(9Z-oct LMGP0109 Glyceroph level 3 Multiple class     |
| - -                   | 1 N-(2-hydr LMSP0501 Neutral gly level 1 Unique lipid      |
| 2 unique li Glyceroph | 15 1-hexadec LMGP0102 Glyceroph level 3 Multiple class     |
| - -                   | 0 - - - -                                                  |
| - -                   | 0 - - - -                                                  |
| - -                   | 2 -,N-(9Z-o LMPR0201 Phosphos level 3 Multiple class       |
| - -                   | 0 - - - -                                                  |
| - -                   | 11 1-hexadec LMGP0102 Glyceroph level 3 Multiple class     |
| - -                   | 11 1-hexadec LMGP0102 Glyceroph level 3 Multiple class     |
| - -                   | 16 1,2-didodec LMGL0301 Triradylgly level 2 Unique class   |
| - -                   | 0 - - - -                                                  |
| - -                   | 5 N-(tricosal LMSP0301 Phosphos level 2 Unique class       |
| - -                   | 9 1-eicosyl- LMGP1002 Diradylgly level 3 Multiple class    |
| - -                   | 14 1-(1Z-hex LMGP0103 Glyceroph level 3 Multiple class     |
| - -                   | 0 - - - -                                                  |
| - -                   | 0 - - - -                                                  |
| - -                   | 27 1-hexadec LMGP0102 Glyceroph level 3 Multiple class     |
| - -                   | 2 1-hexadec LMGP0202 Glyceroph level 2 Unique class        |
| - -                   | 1 3,7,11,15,1 LMPR0301 Polyprenol level 1 Unique lipid     |
| - -                   | 19 1-(5Z,8Z,1 LMGP1001 Glyceroph level 3 Multiple class    |
| - -                   | 13 1-(9Z-pen LMGP0201 Glyceroph level 3 Multiple class     |
| - -                   | 0 - - - -                                                  |
| 2 unique li Glyceroph | 42 1-tridecan LMGP0101 Glyceroph level 3 Multiple class    |
| 2 unique li Glyceroph | 13 1-(9Z-oct LMGP0109 Glyceroph level 3 Multiple class     |
| - -                   | 28 1-hexadec LMGP0101 Glyceroph level 3 Multiple class     |
| - -                   | 8 1-(1Z-oct LMGP0103 Glyceroph level 3 Multiple class      |
| 2 unique li Glyceroph | 0 - - - -                                                  |
| - -                   | 1 1-(6-[3]-la LMGP0104 Glyceroph level 1 Unique lipid      |
| - -                   | 0 - - - -                                                  |
| - -                   | 14 1-eicosyl- LMGP1002 Glyceroph level 3 Multiple class    |
| - -                   | 0 - - - -                                                  |
| - -                   | 19 1,2-ditride LMGL0301 Triradylgly level 2 Unique class   |
| - -                   | 0 - - - -                                                  |
| - -                   | 3 N-(pentac LMSP0301 Phosphos level 2 Unique class         |
| - -                   | 16 1-dodecar LMGP0401 Glyceroph level 2 Unique class       |
| 2 unique li unknow    | 3 N-(docosa LMSP0501 Neutral gly level 2 Unique class      |
| - -                   | 27 1,2-ditetra LMGL0301 Triradylgly level 2 Unique class   |
| - -                   | 9 1,2-di-(4Z LMGP1001 Glyceroph level 3 Multiple class     |
| 2 unique li Glyceroph | 48 1-pentade LMGP0101 Glyceroph level 3 Multiple class     |
| 2 unique li Glyceroph | 20 1-hexadec LMGP0102 Glyceroph level 3 Multiple class     |
| - -                   | 0 - - - -                                                  |
| - -                   | 24 1-pentade LMGP0101 Glyceroph level 3 Multiple class     |
| - -                   | 9 1-pentade LMGP0401 Glyceroph level 3 Multiple class      |
| - -                   | 6 1-tetradec LMGP0102 Glyceroph level 3 Multiple class     |
| - -                   | 0 - - - -                                                  |
| - -                   | 0 - - - -                                                  |
| - -                   | 32 1-(5Z,8Z,1 LMGL0501 Glyceroph level 3 Multiple class    |
| 2 unique li Glyceroph | 7 1-tetradec LMGP0102 Glyceroph level 3 Multiple class     |
| 2 unique li Phosphos  | 2 N-(15Z-te LMSP0301 Phosphos level 2 Unique class         |
| - -                   | 58 1-dodecar LMGL0301 Neutral gly level 3 Multiple class   |
| - -                   | 13 1-dodecar LMGL0301 Triradylgly level 2 Unique class     |
| - -                   | 0 - - - -                                                  |
| 2 unique li Phosphos  | 0 - - - -                                                  |

|   |           |    |                      |              |         |                |
|---|-----------|----|----------------------|--------------|---------|----------------|
| - | -         | 3  | N-(15Z)-te LMSP0301  | Phosphosφ    | level 2 | Unique class   |
| - | -         | 8  | 1-(1Z)-eicc LMGP1003 | Glycerophφ   | level 3 | Multiple class |
| - | -         | 0  | -                    | -            | -       | -              |
| 2 | unique li | 50 | 1-(9Z)-hex LMGP0101  | Glycerophφ   | level 3 | Multiple class |
| 2 | unique li | 62 | N-(dodeca LMSP0501   | Glycerophφ   | level 3 | Multiple class |
| - | -         | 15 | 1-(1Z)-eicc LMGP1003 | Glycerophφ   | level 3 | Multiple class |
| 2 | unique li | 62 | 1-hexadec LMGP0101   | Glycerophφ   | level 3 | Multiple class |
| - | -         | 7  | 1-eicosyl- LMGP1002  | Glycerophφ   | level 3 | Multiple class |
| - | -         | 2  | N-(15Z)-te LMSP0301  | Phosphosφ    | level 2 | Unique class   |
| - | -         | 1  | N-(docosa LMSP0301   | Phosphosφ    | level 1 | Unique lipid   |
| - | -         | 14 | 1-dodecar LMGL0301   | Triradylgly  | level 2 | Unique class   |
| - | -         | 0  | -                    | -            | -       | -              |
| 2 | unique li | 0  | -                    | -            | -       | -              |
| 2 | unique li | 4  | N-(15Z)-te LMSP0301  | Neutral gly  | level 3 | Multiple class |
| - | -         | 3  | 1-(1Z)-eicc LMGP0103 | Glycerophφ   | level 3 | Multiple class |
| - | -         | 24 | 1,2-ditride LMGL0301 | Triradylgly  | level 2 | Unique class   |
| 2 | unique li | 0  | -                    | -            | -       | -              |
| 1 | unique li | 15 | 1-(1Z)-octa LMGP0103 | Glycerophφ   | level 2 | Unique class   |
| - | -         | 11 | 1-heptade LMGP0401   | Glycerophφ   | level 3 | Multiple class |
| 2 | unique li | 42 | 1-heptade LMGP0101   | Glycerophφ   | level 3 | Multiple class |
| - | -         | 2  | N-(tricosai LMSP0501 | Neutral gly  | level 2 | Unique class   |
| 2 | unique li | 2  | N-(15Z)-te LMSP0301  | Phosphosφ    | level 2 | Unique class   |
| 2 | unique li | 4  | 1-eicosyl- LMGP0402  | Glycerophφ   | level 3 | Multiple class |
| - | -         | 0  | -                    | -            | -       | -              |
| 1 | unique li | 18 | 1-octadec LMGP0102   | Glycerophφ   | level 3 | Multiple class |
| - | -         | 2  | 1-(4Z,7Z,1 LMGP0201  | Glycerophφ   | level 2 | Unique class   |
| 2 | unique li | 40 | 1-(6Z,9Z,1 LMGP0101  | Glycerophφ   | level 3 | Multiple class |
| - | -         | 3  | 1-(5Z,8Z,1 LMGP0201  | Glycerophφ   | level 2 | Unique class   |
| - | -         | 5  | 1-(8Z,11Z, LMGP0201  | Glycerophφ   | level 3 | Multiple class |
| - | -         | 3  | 1-(1Z)-eicc LMGP0103 | Glycerophφ   | level 3 | Multiple class |
| 2 | unique li | 38 | 1-(11Z)-oc LMGP0101  | Glycerophφ   | level 3 | Multiple class |
| - | -         | 3  | 3-O-(6'-O LMST0101   | Sterols [ST  | level 2 | Unique class   |
| 2 | unique li | 3  | 1-(2E,6E-φ LMGP0104  | Glycerophφ   | level 3 | Multiple class |
| - | -         | 1  | N-(15Z)-te LMSP0301  | Phosphosφ    | level 1 | Unique lipid   |
| 2 | unique li | 24 | N-(tetradec LMSP0501 | Glycerophφ   | level 3 | Multiple class |
| - | -         | 8  | 1-eicosyl- LMGP0302  | Glycerophφ   | level 3 | Multiple class |
| - | -         | 8  | 1-(9Z)-hep LMGP0101  | Glycerophφ   | level 3 | Multiple class |
| 2 | unique li | 59 | 1-eicosyl- LMGP0402  | Glycerophφ   | level 3 | Multiple class |
| - | -         | 0  | -                    | -            | -       | -              |
| - | -         | 1  | N-(tetraco LMSP0301  | Phosphosφ    | level 1 | Unique lipid   |
| - | -         | 32 | 1-(3-hydr LMGP0404   | Glycerophφ   | level 3 | Multiple class |
| - | -         | 0  | -                    | -            | -       | -              |
| - | -         | 7  | 1-nonadec LMGP0401   | Glycerophφ   | level 3 | Multiple class |
| - | -         | 0  | -                    | -            | -       | -              |
| - | -         | 2  | Acetyl-Co LMFA0705   | Fatty ester: | level 2 | Unique class   |
| 1 | unique li | 10 | 1-eicosyl- LMGP0102  | Glycerophφ   | level 2 | Unique class   |
| - | -         | 23 | 1-octadec LMGP0101   | Glycerophφ   | level 3 | Multiple class |
| - | -         | 1  | 3-O-(6'-O LMST0103   | Sterols [ST  | level 1 | Unique lipid   |
| - | -         | 1  | 3-O-(6'-O LMST0103   | Sterols [ST  | level 1 | Unique lipid   |
| - | -         | 22 | 1-eicosyl- LMGP0402  | Glycerophφ   | level 3 | Multiple class |
| - | -         | 0  | -                    | -            | -       | -              |
| - | -         | 0  | -                    | -            | -       | -              |
| 2 | unique li | 0  | -                    | -            | -       | -              |
| - | -         | 0  | -                    | -            | -       | -              |
| - | -         | 7  | 1-tetracos LMGP0102  | Glycerophφ   | level 2 | Unique class   |
| 2 | unique li | 51 | 1-heptade LMGL0301   | Triradylgly  | level 2 | Unique class   |
| - | -         | 0  | -                    | -            | -       | -              |
| - | -         | 0  | -                    | -            | -       | -              |

|   |   |     |            |          |             |         |                |
|---|---|-----|------------|----------|-------------|---------|----------------|
| - | - | 3   | 1-heneico: | LMGP0401 | Glyceroph   | level 3 | Multiple class |
| - | - | 0   | -          | -        | -           | -       | -              |
| - | - | 0   | -          | -        | -           | -       | -              |
| - | - | 1   | 1-(1Z-eicc | LMGP0303 | Glyceroph   | level 1 | Unique lipid   |
| - | - | 10  | 1,2-diocta | LMGP0601 | Glyceroph   | level 3 | Multiple class |
| - | - | 66  | 1,2-di-(9Z | LMGL0301 | Glyceroph   | level 3 | Multiple class |
| - | - | 0   | -          | -        | -           | -       | -              |
| - | - | 0   | -          | -        | -           | -       | -              |
| - | - | 2   | 1-(11Z-do  | LMGP0101 | Glyceroph   | level 2 | Unique class   |
| - | - | 6   | 1-heneico: | LMGP0401 | Glyceroph   | level 3 | Multiple class |
| - | - | 1   | 1-(13Z,16Z | LMGP0102 | Glyceroph   | level 1 | Unique lipid   |
| - | - | 0   | -          | -        | -           | -       | -              |
| - | - | 0   | -          | -        | -           | -       | -              |
| - | - | 0   | -          | -        | -           | -       | -              |
| - | - | 4   | N-tetracos | LMSP0602 | Acidic glyc | level 3 | Multiple class |
| - | - | 0   | -          | -        | -           | -       | -              |
| - | - | 0   | -          | -        | -           | -       | -              |
| - | - | 32  | 1-(9Z,12Z, | LMGL0301 | Sterols [ST | level 3 | Multiple class |
| - | - | 0   | -          | -        | -           | -       | -              |
| - | - | 114 | 1-(9Z,12Z, | LMGL0301 | Triradylgly | level 2 | Unique class   |
| - | - | 5   | 1-nonader  | LMGP0601 | Glyceroph   | level 2 | Unique class   |
| - | - | 0   | -          | -        | -           | -       | -              |
| - | - | 0   | -          | -        | -           | -       | -              |
| - | - | 0   | -          | -        | -           | -       | -              |
| - | - | 0   | -          | -        | -           | -       | -              |
| - | - | 4   | N-(hexaco  | LMSP0303 | Phosphosç   | level 2 | Unique class   |
| - | - | 2   | -;-        | LMPK1211 | Flavonoids  | level 2 | Unique class   |
| - | - | 1   | 2-O-hexac  | LMSL0300 | Acyltrehalc | level 1 | Unique lipid   |
| - | - | 6   | N-(15Z-te  | LMSP0501 | Isoprenoid  | level 3 | Multiple class |
| - | - | 0   | -          | -        | -           | -       | -              |
| - | - | 0   | -          | -        | -           | -       | -              |
| - | - | 0   | -          | -        | -           | -       | -              |
| - | - | 0   | -          | -        | -           | -       | -              |
| - | - | 2   | -;-        | LMPR0107 | Isoprenoid  | level 2 | Unique class   |
| - | - | 4   | N-(docosa  | LMSP0501 | Neutral gly | level 2 | Unique class   |
| - | - | 0   | -          | -        | -           | -       | -              |
